# Supplementary material
Source: publisher figshare collection journal article supplement (https://frontiersin.figshare.com/ndownloader/files/21913386)
Supplement: Supplementary file [file 21913386]

## *Supplementary Material for*

# **Organocatalytic enantioselective conjugate addition of nitromethane to benzylidene-2-benzoyl acetate: Asymmetric synthesis of ABT – 627, an endothelin receptor antagonist**

**Saumen Hajra<sup>\*1</sup>, Sk Mohammad Aziz<sup>2,3</sup>, Bibekananda Jana<sup>1,2</sup>, Sunit Hazra<sup>2,4</sup>**

<sup>1</sup>Centre of Biomedical Research, Sanjay Gandhi Post-Graduate Institute of Medical Sciences Campus, Raebareli Road, Lucknow 226014, India

<sup>2</sup>Department of Chemistry, Indian Institute of Technology Kharagpur, Kharagpur 721302, India

<sup>3</sup>Present address: Department of Chemistry, Narajole Raj College, Narajole, West Midnapore 721211, India

<sup>4</sup>Present address: Department of Applied Chemistry, Graduate School of Engineering, Osaka University, Suita, Osaka – 5650871, Japan

## **Table of Contents**

| <b>List of contents</b>                  | <b>Page</b> |
|------------------------------------------|-------------|
| Title, authors' name, address and tables | S1          |
| NMR copies of compounds                  | S2-S19      |
| HPLC copies of compounds                 | S20-S35     |

# <sup>1</sup>H NMR and <sup>13</sup>C NMR Spectra of all Compounds:

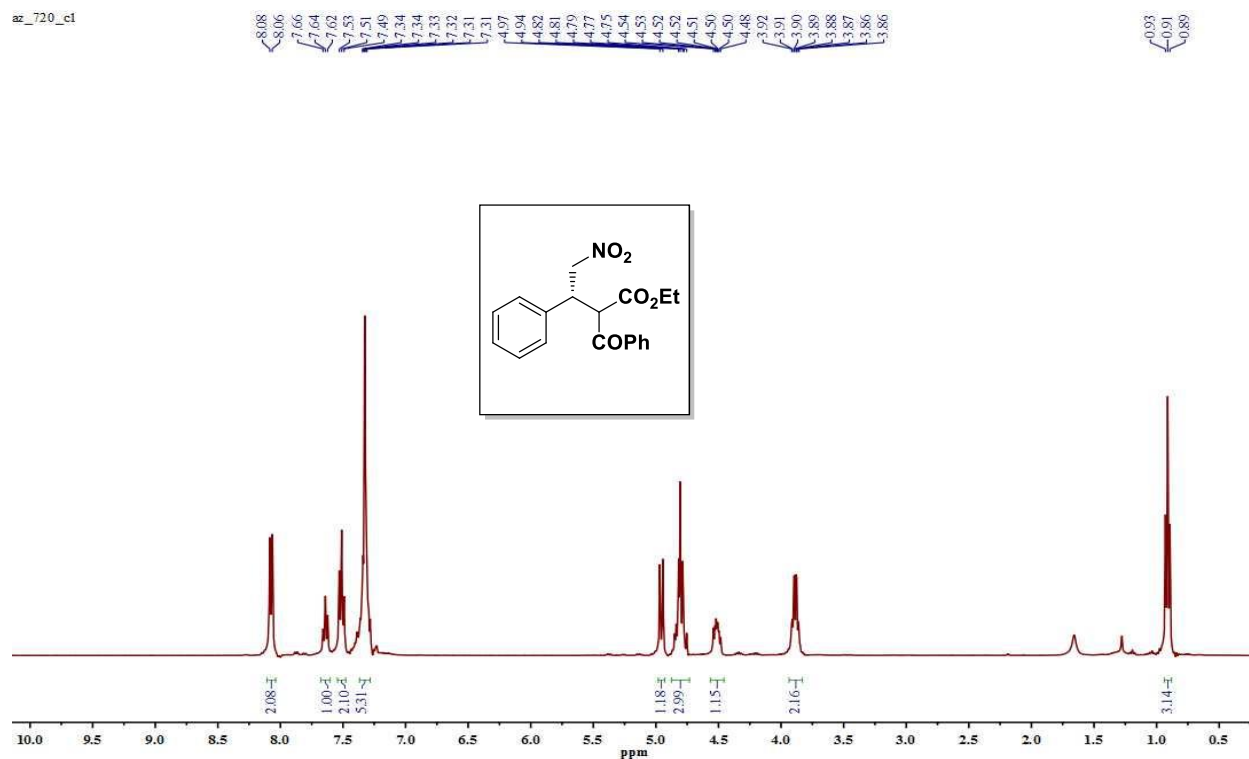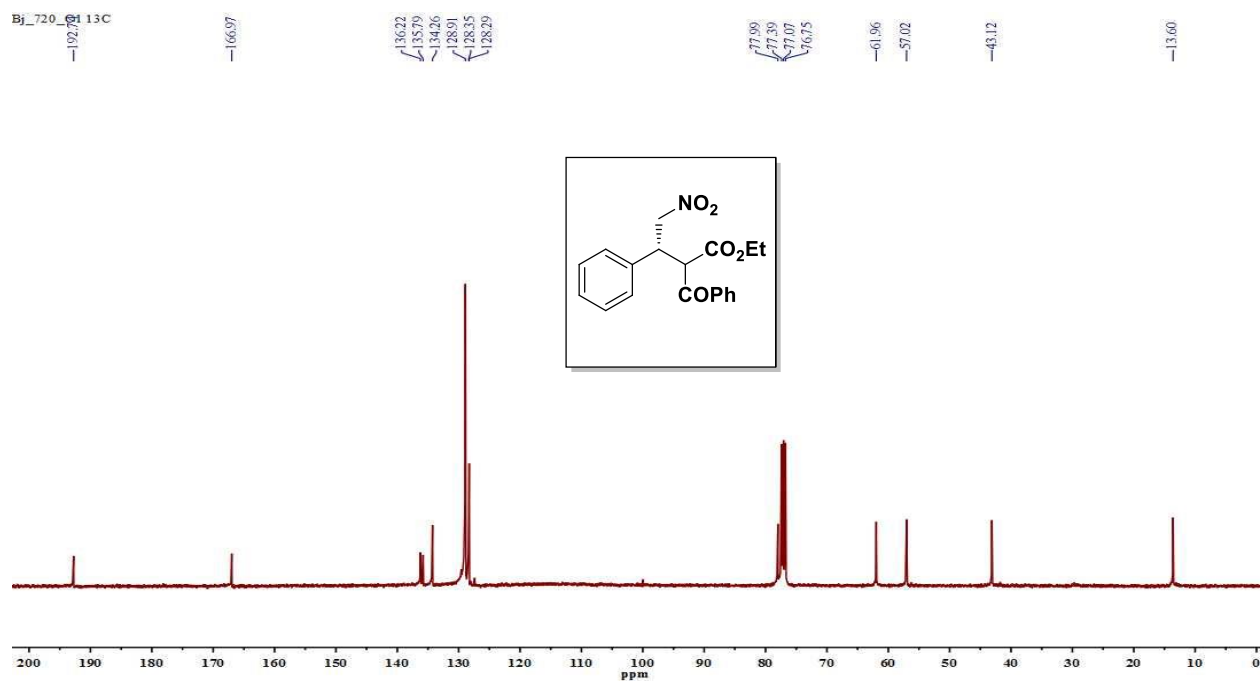

az\_737\_c1

8.24  
8.22  
8.08  
8.06  
7.69  
7.68  
7.56  
7.55  
7.53  
7.52  
7.28

4.98  
4.97  
4.95  
4.86  
4.86  
4.85  
4.85  
4.83  
4.83  
4.82  
4.67  
4.66  
4.65  
4.64  
4.64  
4.63  
4.62  
3.96  
3.94  
3.92  
3.90

0.97  
0.97  
0.96  
0.95  
0.94  
0.93

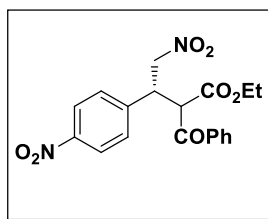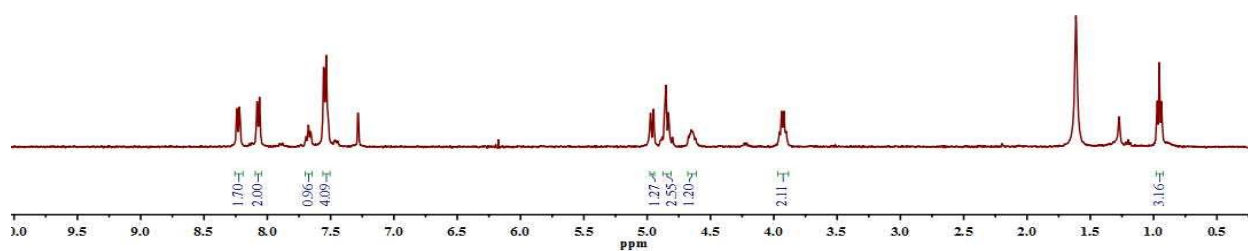

<sup>1</sup>H NMR Spectrum of Compound **2b** (400 MHz, CDCl<sub>3</sub>)

Bj\_737\_02 13C

166.50

147.79

143.84

135.42

134.62

129.49

129.04

128.92

124.08

77.36

77.28

77.05

76.73

62.36

56.39

42.72

13.67

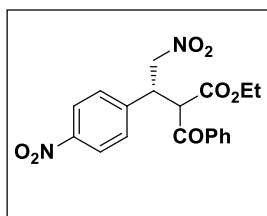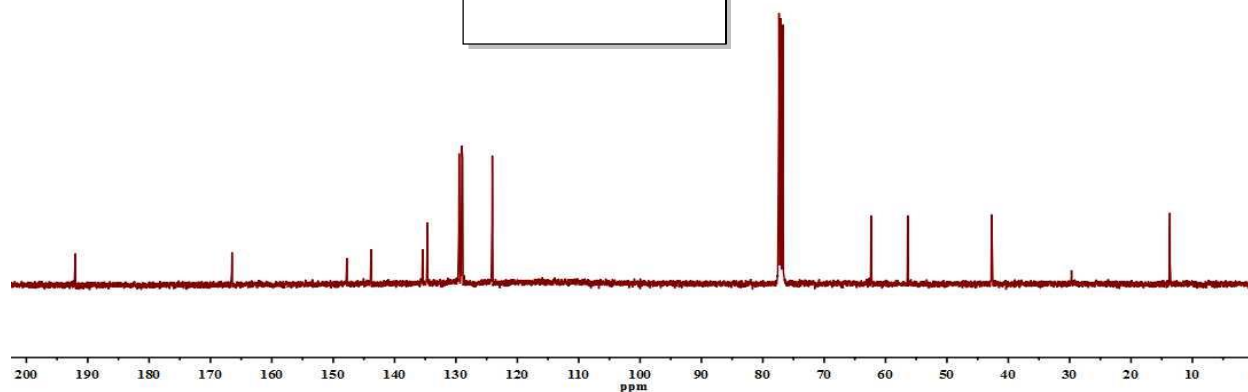

<sup>13</sup>C NMR Spectrum of Compound **2b** (100 MHz, CDCl<sub>3</sub>)

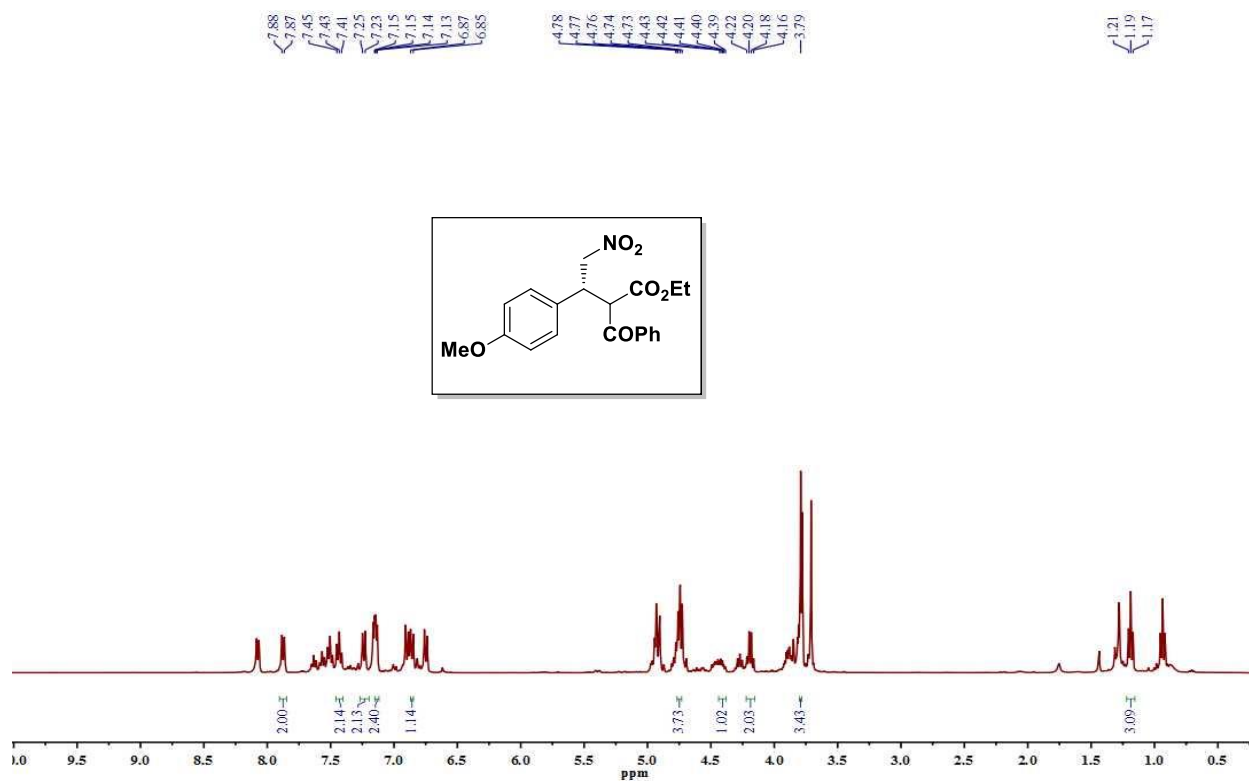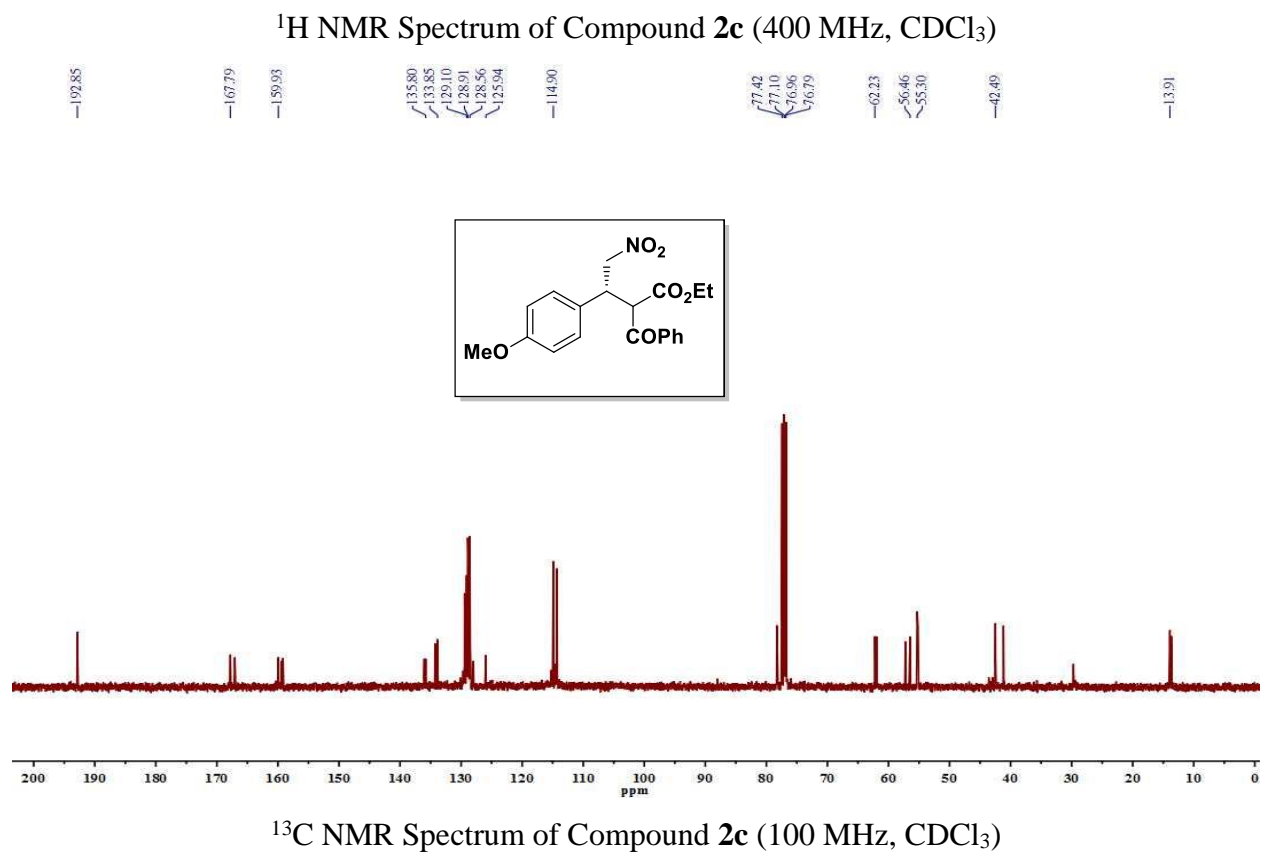

sh0714.az.741c1

8.07  
8.03  
7.55  
7.54  
7.51  
7.50  
7.47  
7.46  
7.44  
7.31  
7.29  
7.27  
7.26  
7.24  
4.94  
4.93  
4.92  
4.91  
4.89  
4.87  
4.85  
4.83  
4.49  
4.47  
4.46  
4.45  
4.42  
4.40  
4.39  
3.95  
3.92  
3.88  
3.85

0.97  
0.94  
0.90

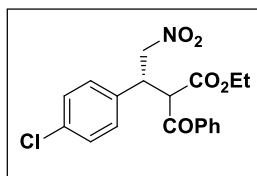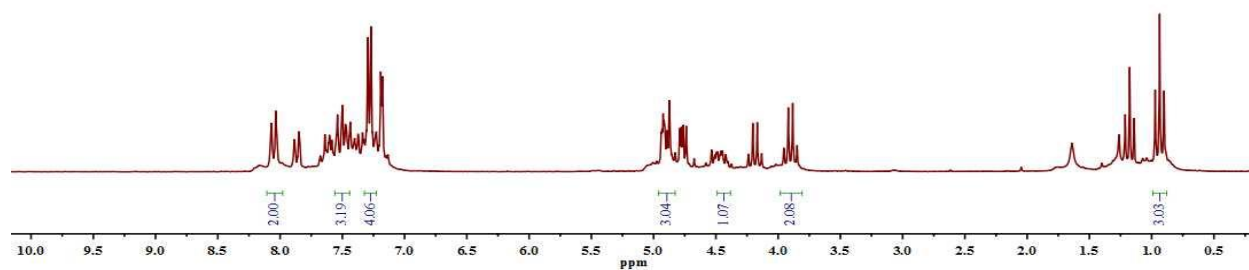

<sup>1</sup>H NMR Spectrum of Compound **2d** (Major Diastereoisomer) (200 MHz, CDCl<sub>3</sub>)

sh0714.az.741c1

7.897  
7.884  
7.849  
7.841  
7.640  
7.628  
7.611  
7.603  
7.597  
7.584  
7.555  
7.548  
7.539  
7.228  
7.191  
7.178

4.789  
4.776  
4.762  
4.738  
4.535  
4.509  
4.495  
4.486  
4.469  
4.459  
4.239  
4.203  
4.168  
4.132

1.212  
1.177  
1.141

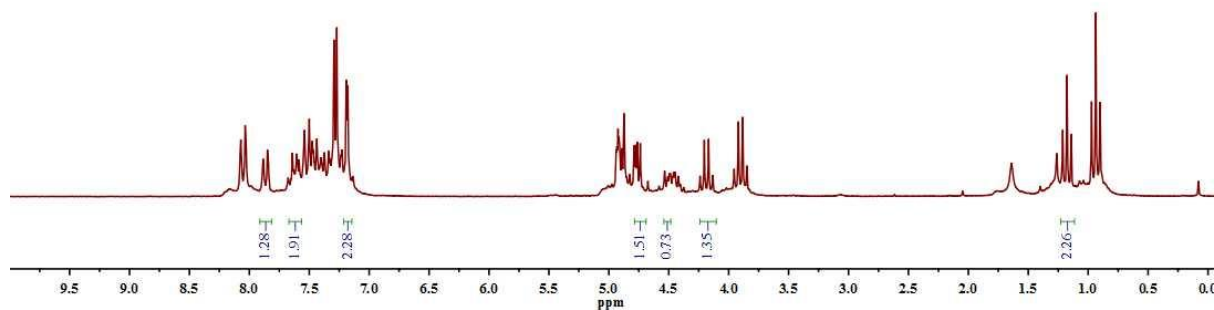

<sup>1</sup>H NMR Spectrum of Compound **2d** (Minor Diastereoisomer) (200 MHz, CDCl<sub>3</sub>)

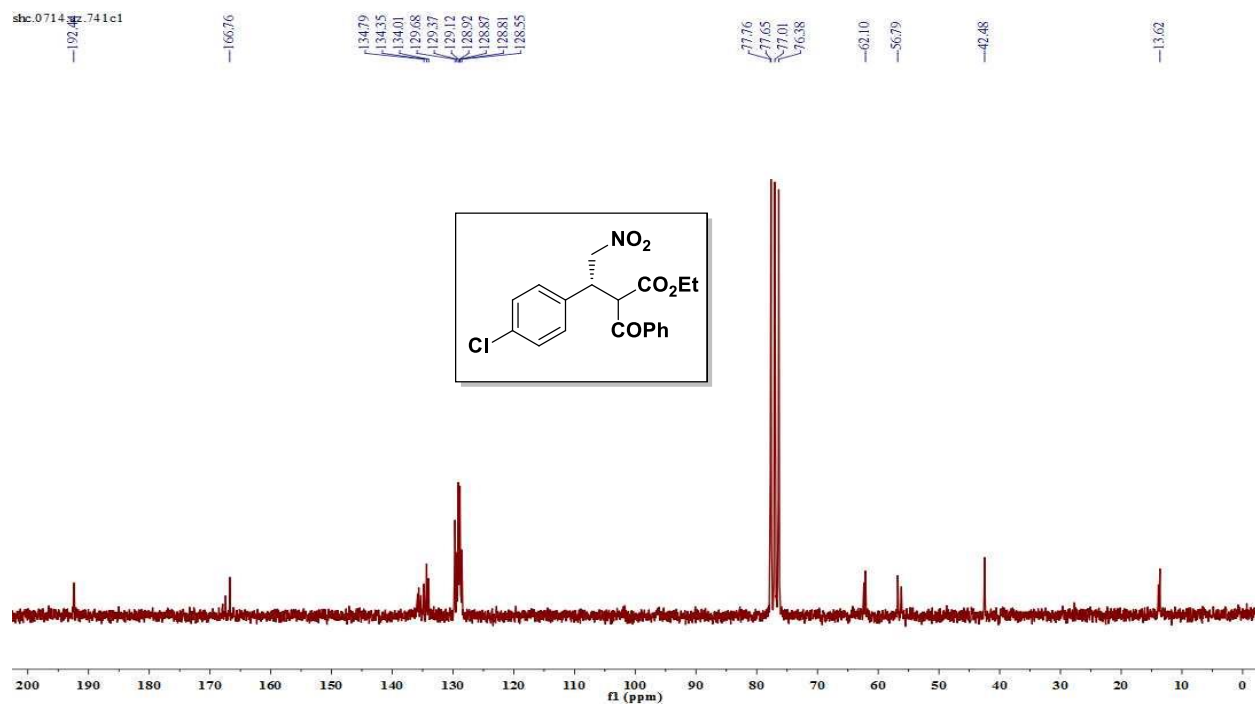

<sup>13</sup>C NMR Spectrum of Compound **2d** (Major Diastereoisomer) (50 MHz, CDCl<sub>3</sub>)

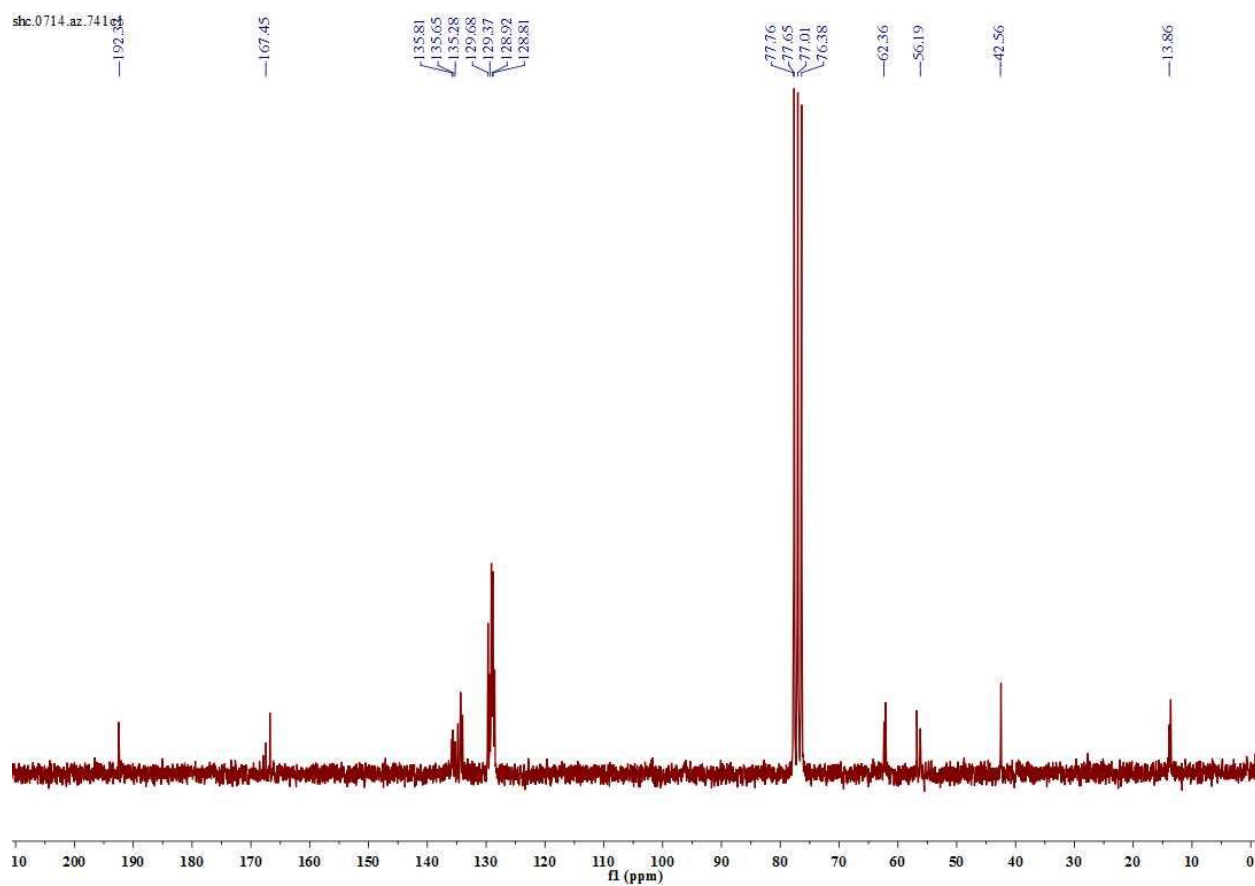

<sup>13</sup>C NMR Spectrum of Compound **2d** (Minor Diastereoisomer) (50 MHz, CDCl<sub>3</sub>)

sh0714.az.742c1

8.07  
8.04  
8.03  
7.50  
7.47  
7.44  
7.43  
7.40  
7.40  
7.30  
7.29  
7.27  
7.26  
7.08  
7.07  
7.06  
7.02  
6.99

4.48  
4.47  
4.46  
4.43  
4.41  
3.95  
3.91  
3.88  
3.84

0.96  
0.93  
0.89

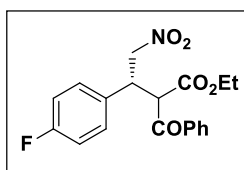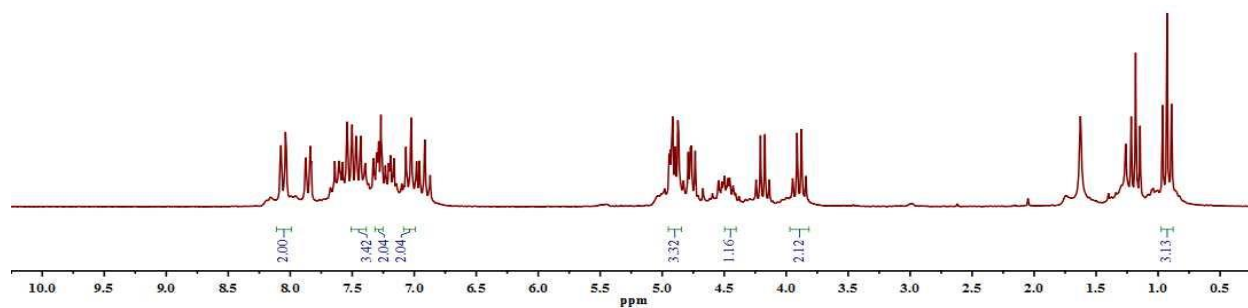

<sup>1</sup>H NMR Spectrum of Compound **2e** (Major Diastereoisomer) (200 MHz, CDCl<sub>3</sub>)

sh0714.az.742c1

7.880  
7.874  
7.866  
7.839  
7.831  
7.640  
7.611  
7.604  
7.597  
7.579  
7.579  
7.431  
7.412  
7.404  
7.396  
7.390  
7.223  
7.206  
7.189  
7.174  
7.163  
7.144  
6.957  
6.925  
6.915  
6.871

4.790  
4.773  
4.764  
4.734  
4.547  
4.519  
4.507  
4.496  
4.243  
4.207  
4.172  
4.136

1.217  
1.182  
1.146

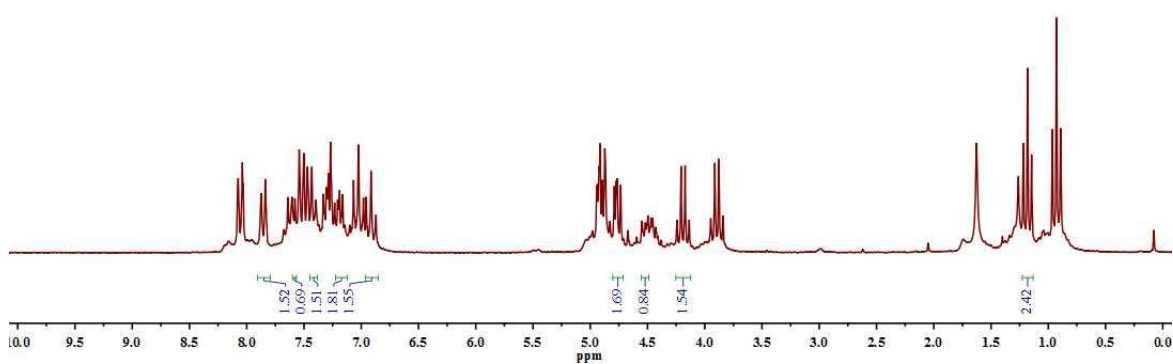

<sup>1</sup>H NMR Spectrum of Compound **2e** (Minor Diastereoisomer) (200 MHz, CDCl<sub>3</sub>)

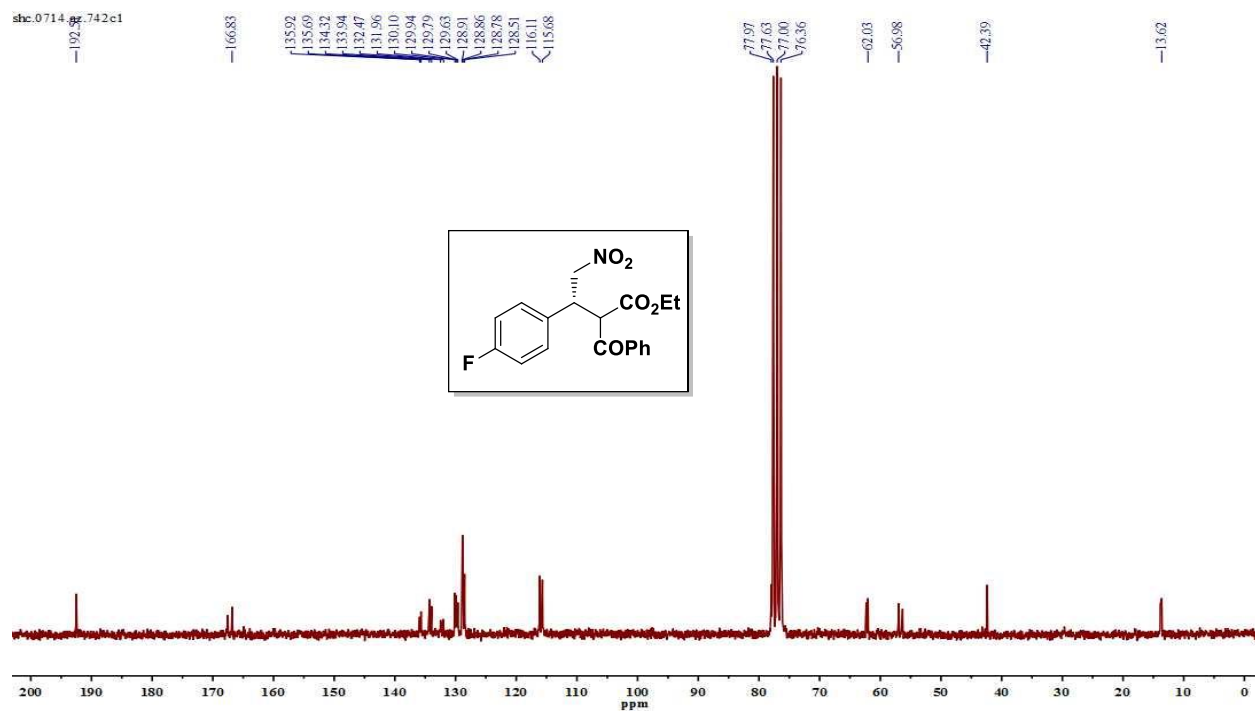

<sup>13</sup>C NMR Spectrum of Compound **2e** (Major Diastereoisomer) (50 MHz, CDCl<sub>3</sub>)

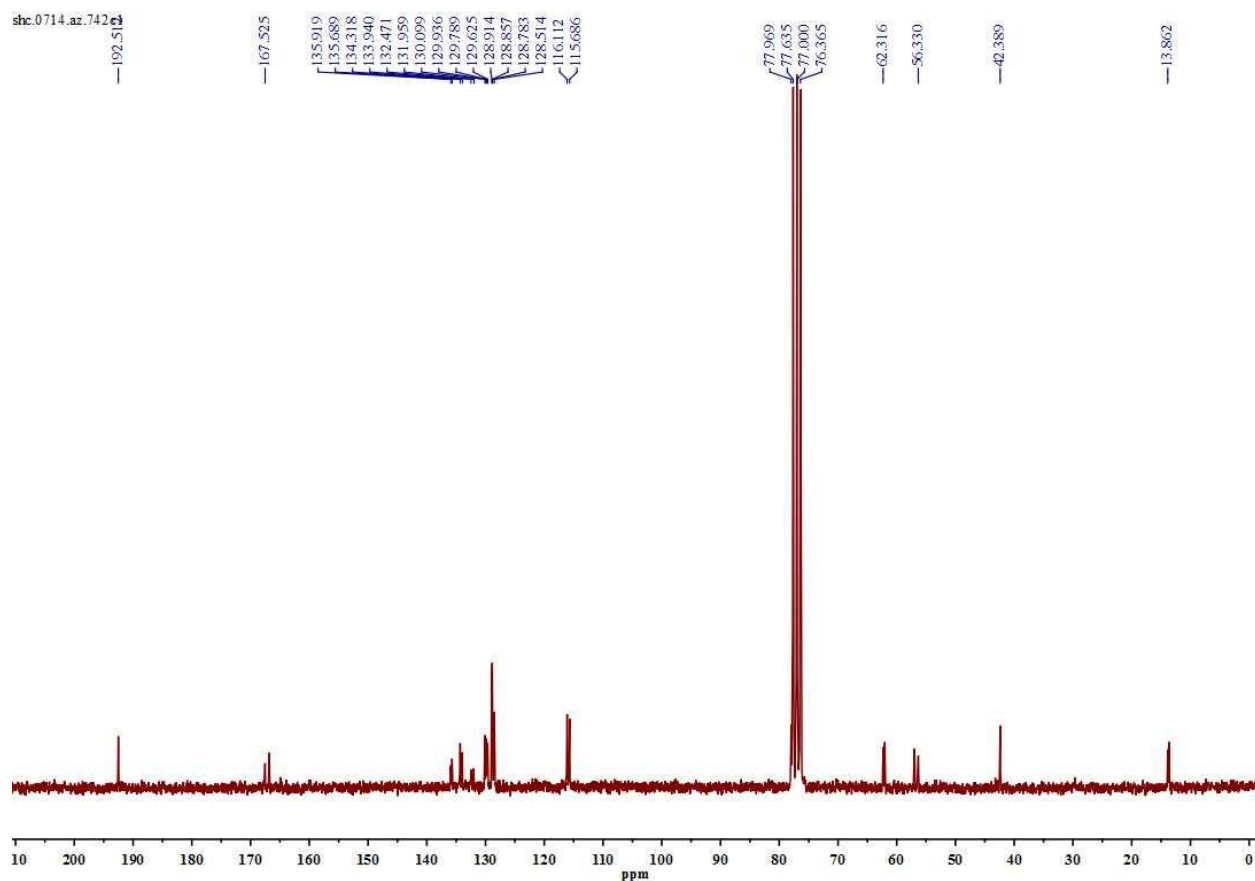

<sup>13</sup>C NMR Spectrum of Compound **2e** (Minor Diastereoisomer) (50 MHz, CDCl<sub>3</sub>)



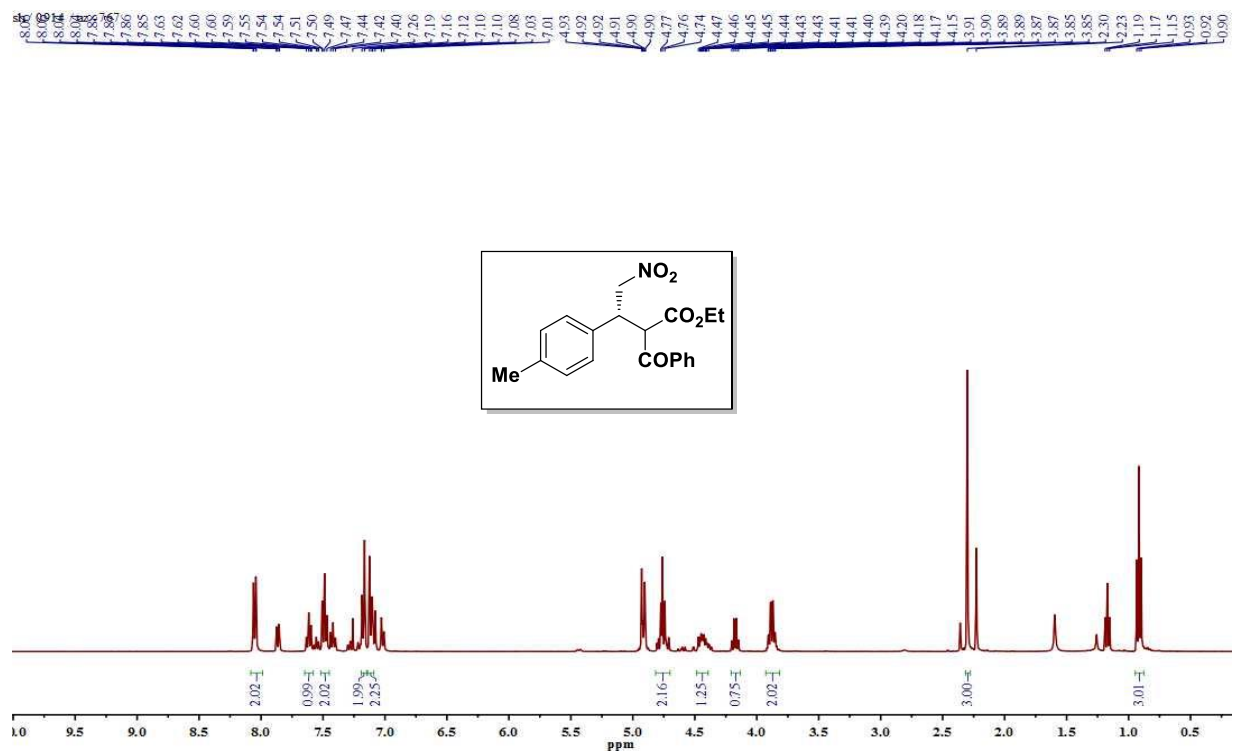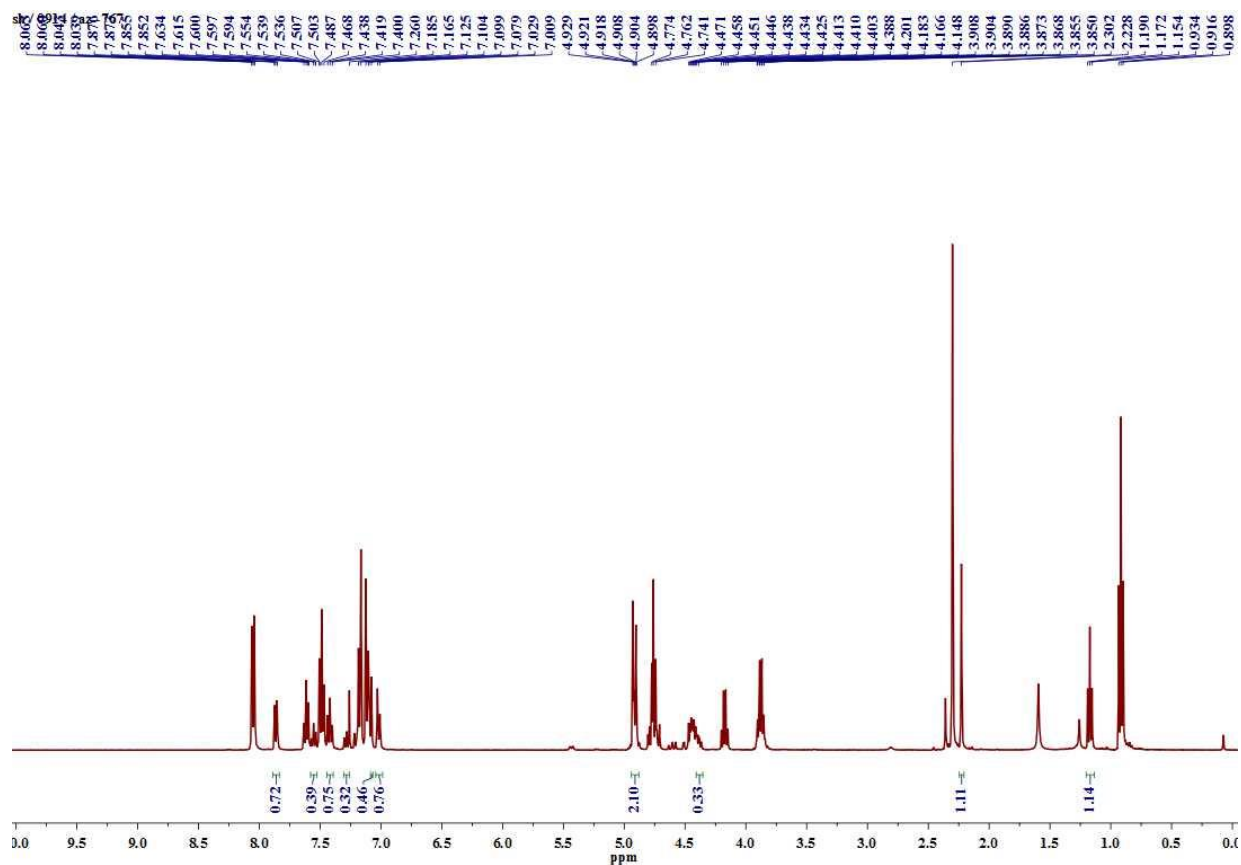

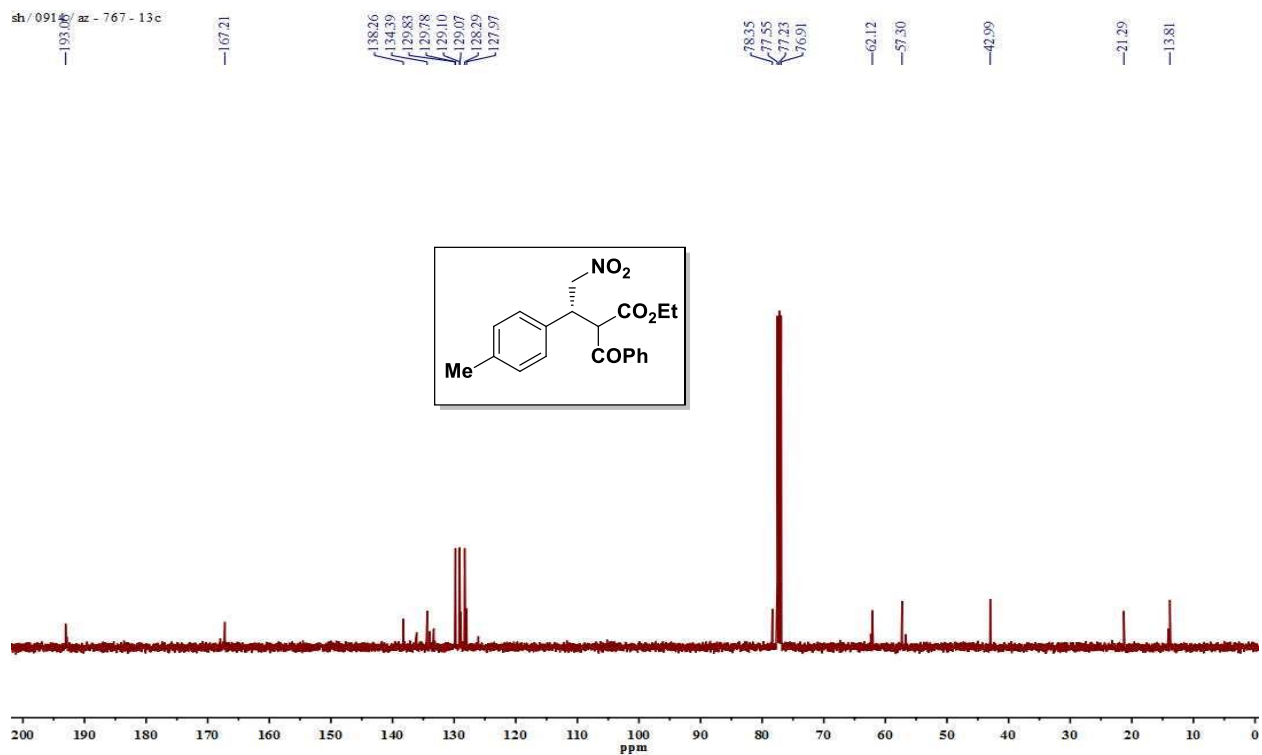

<sup>13</sup>C NMR Spectrum of Compound **2f** (Major Diastereoisomer) (100 MHz, CDCl<sub>3</sub>)

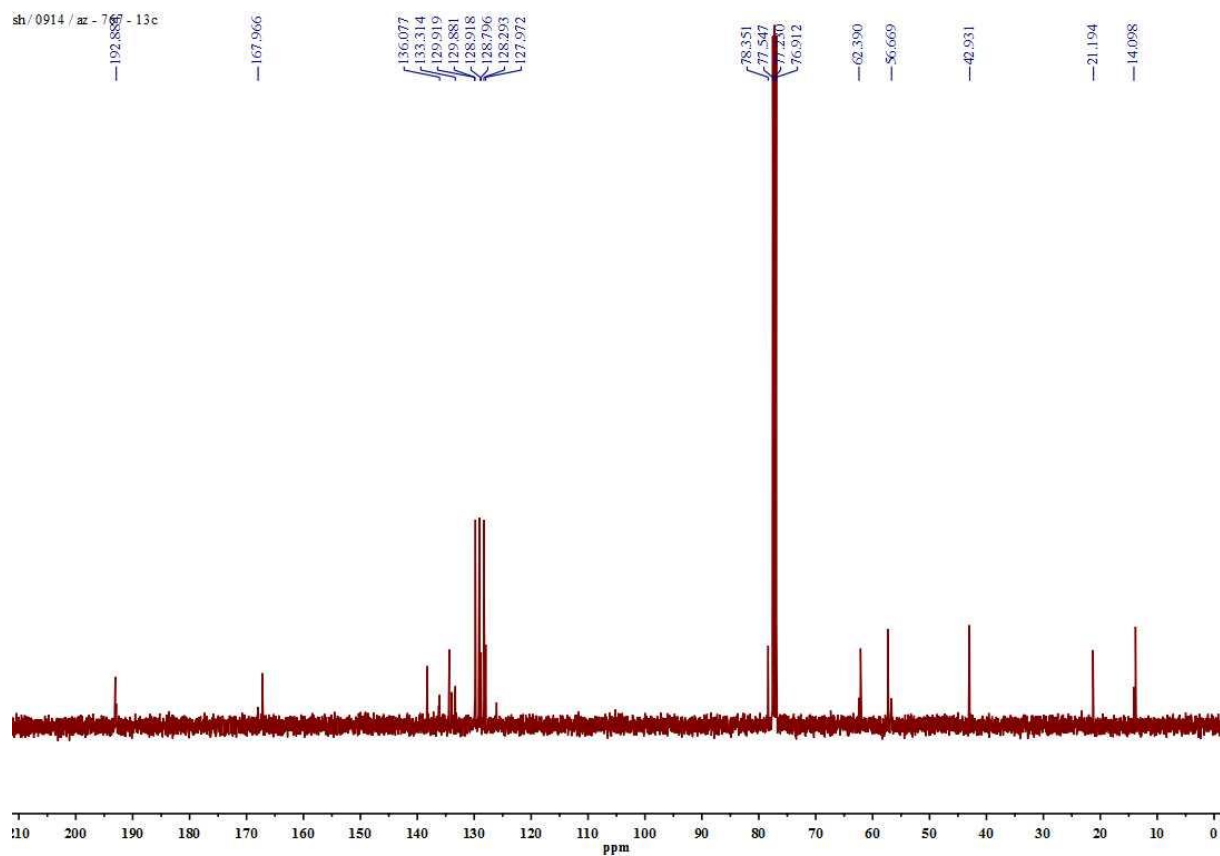

<sup>13</sup>C NMR Spectrum of Compound **2f** (Minor Diastereoisomer) (100 MHz, CDCl<sub>3</sub>)

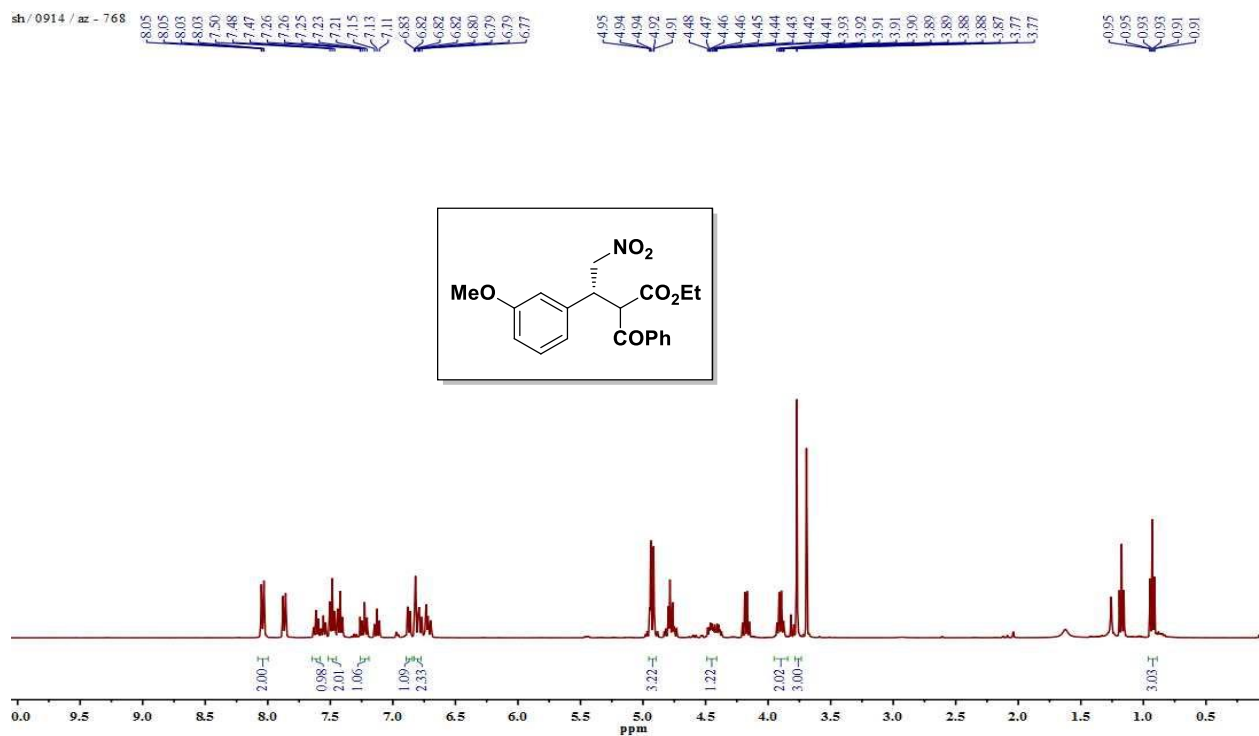

<sup>1</sup>H NMR Spectrum of Compound **2g** (Major Diastereoisomer) (400 MHz, CDCl<sub>3</sub>)

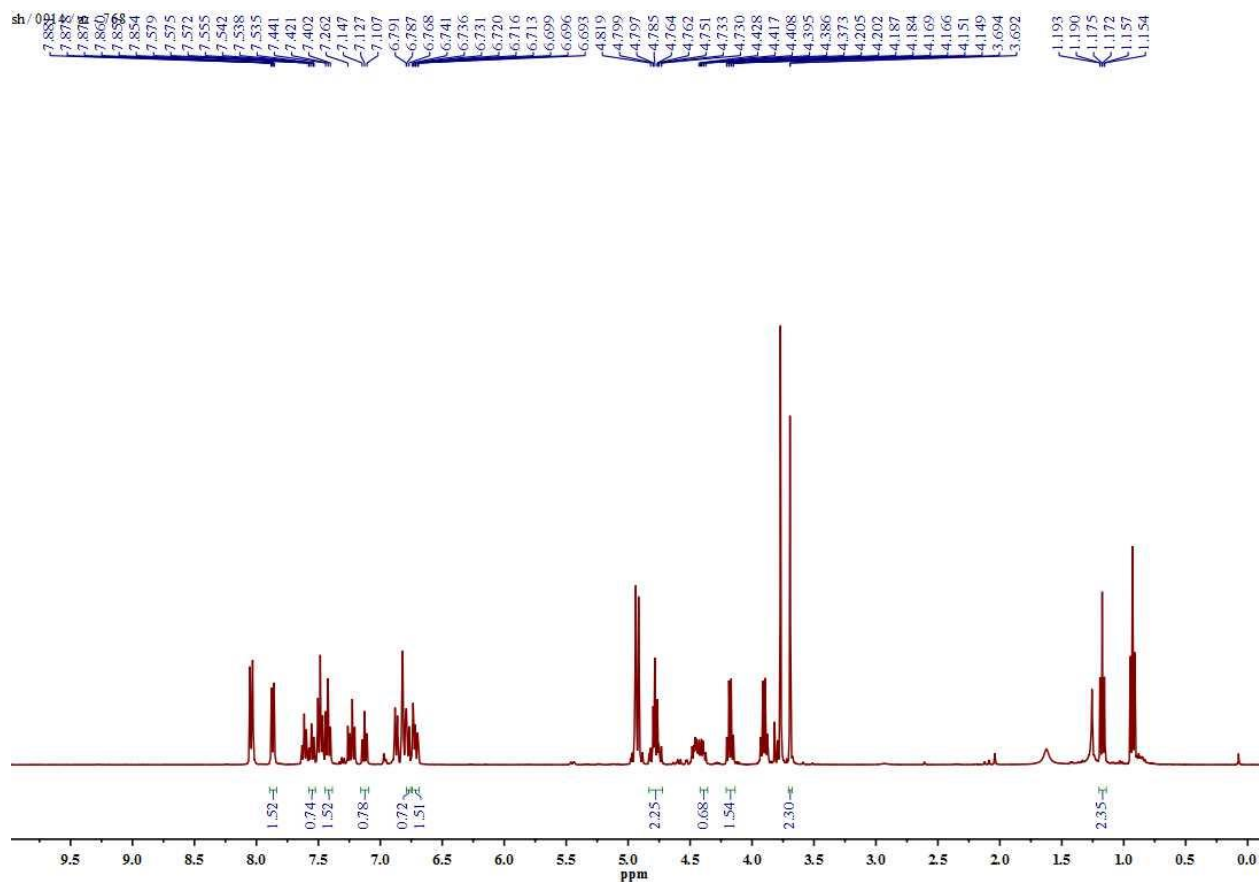

<sup>1</sup>H NMR Spectrum of Compound **2g** (Minor Diastereoisomer) (400 MHz, CDCl<sub>3</sub>)

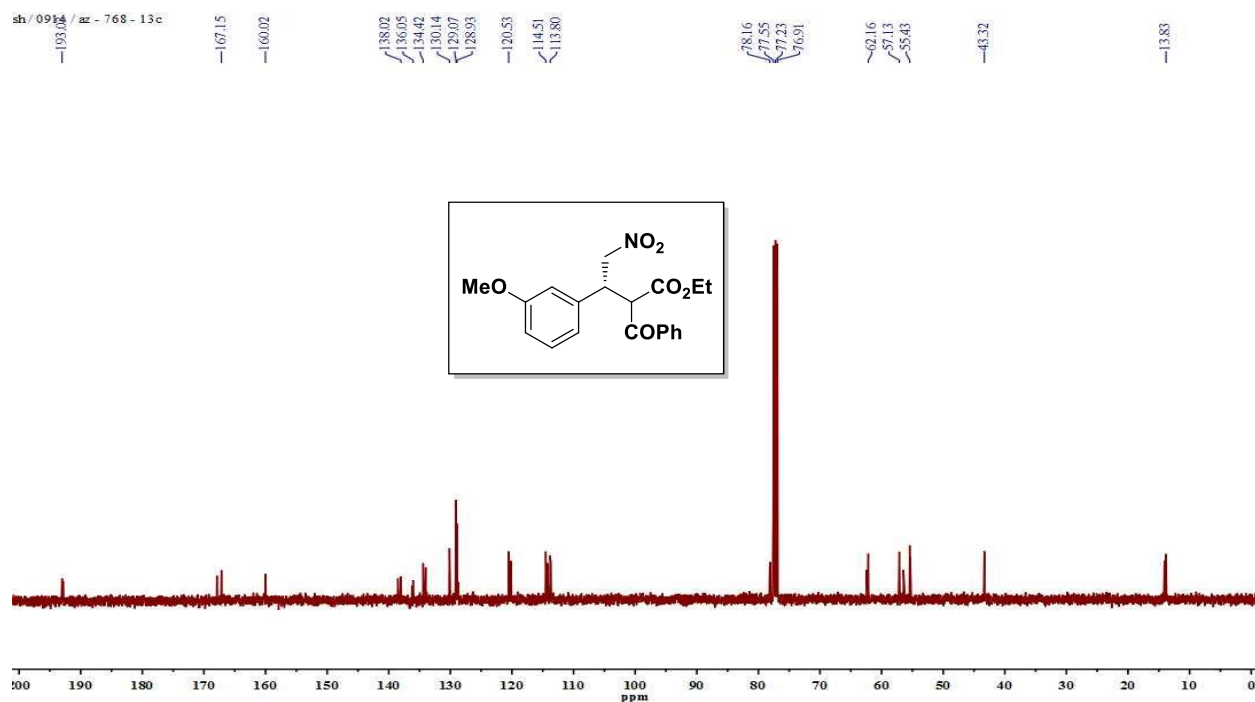

<sup>13</sup>C NMR Spectrum of Compound **2g** (Major Diastereoisomer) (100 MHz, CDCl<sub>3</sub>)

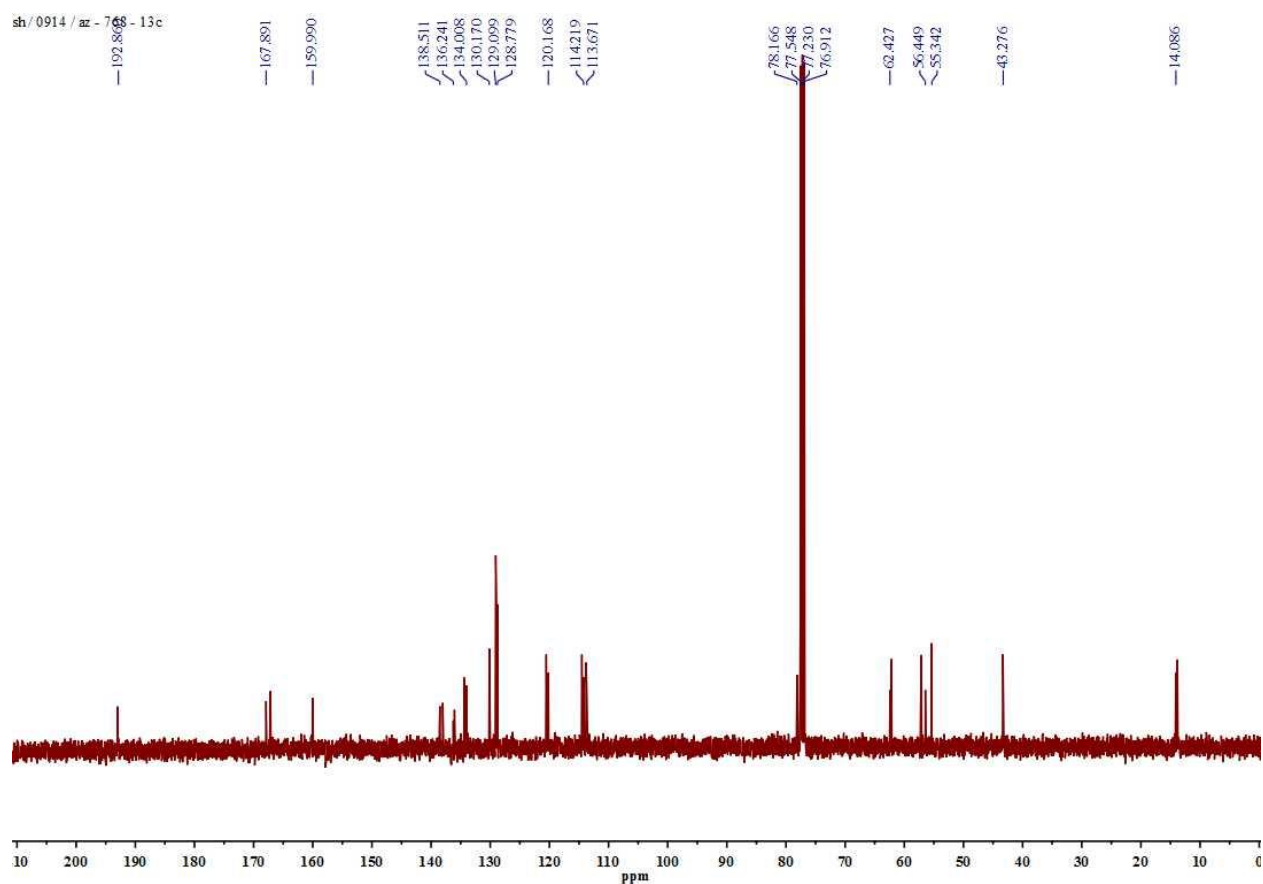

<sup>13</sup>C NMR Spectrum of Compound **2g** (Minor Diastereoisomer) (100 MHz, CDCl<sub>3</sub>)



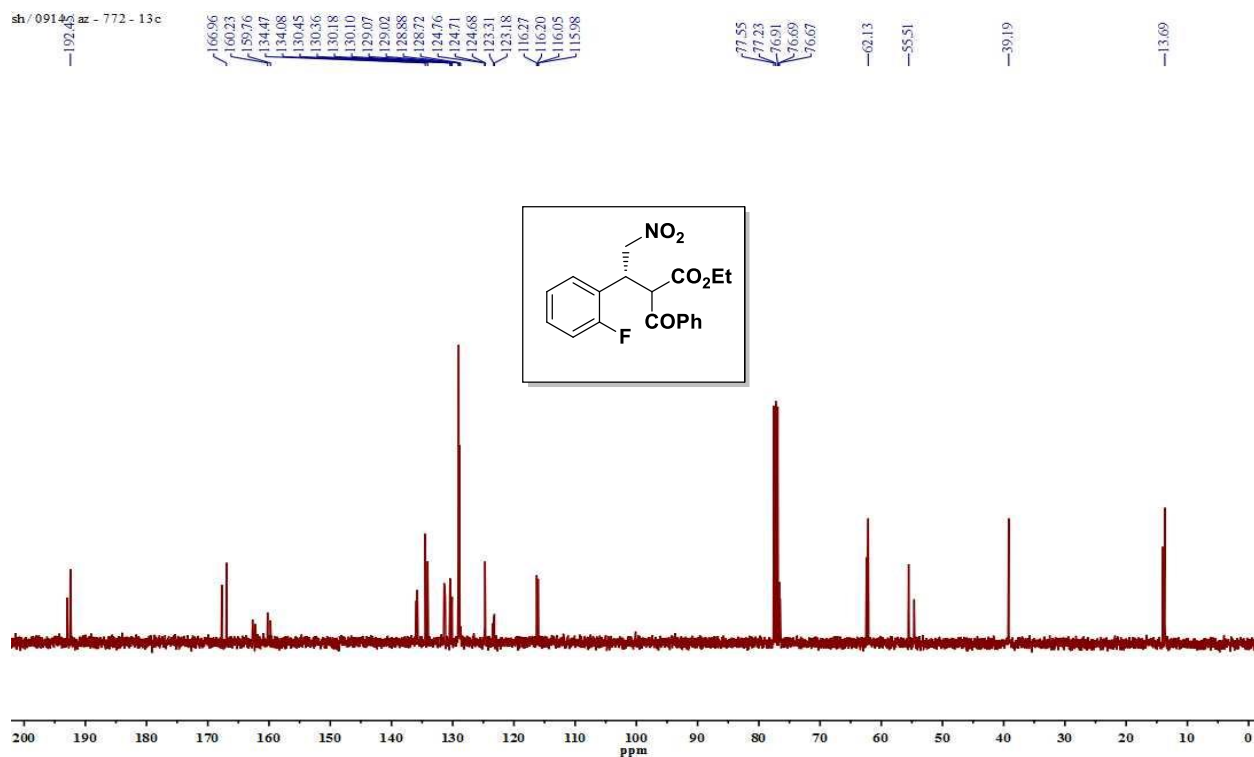

<sup>13</sup>C NMR Spectrum of Compound **2h** (Major Diastereoisomer) (100 MHz, CDCl<sub>3</sub>)

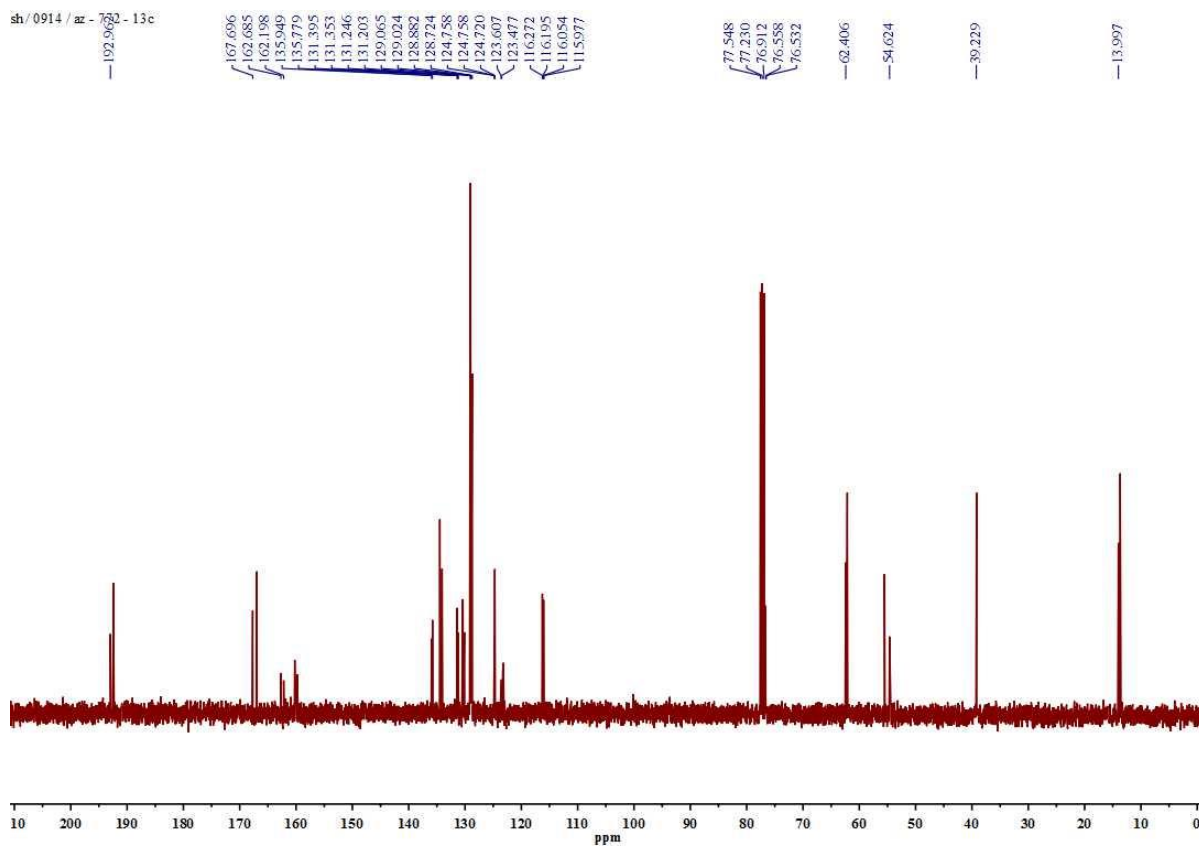

<sup>13</sup>C NMR Spectrum of Compound **2h** (Minor Diastereoisomer) (100 MHz, CDCl<sub>3</sub>)

sh/0914 / az - 769

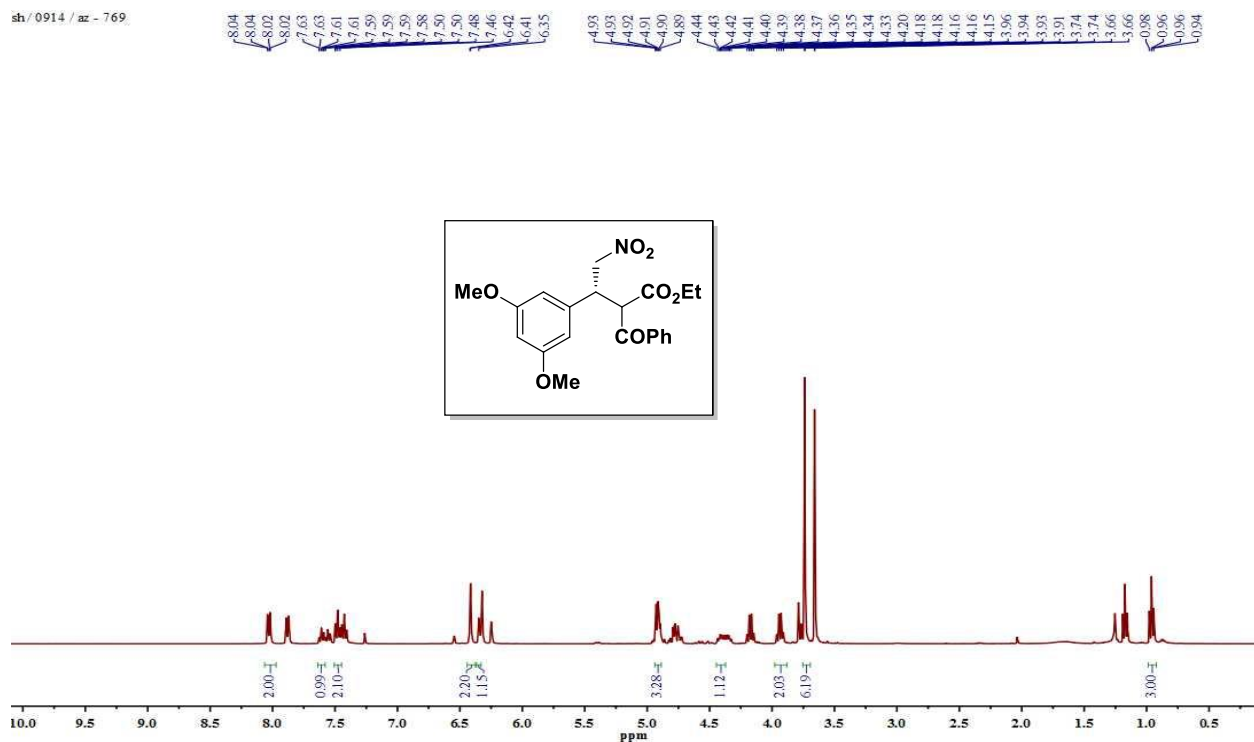

**<sup>1</sup>H NMR Spectrum of Compound **2i** (Major Diastereoisomer) (400 MHz, CDCl<sub>3</sub>)**

sh/0914 / az - 769

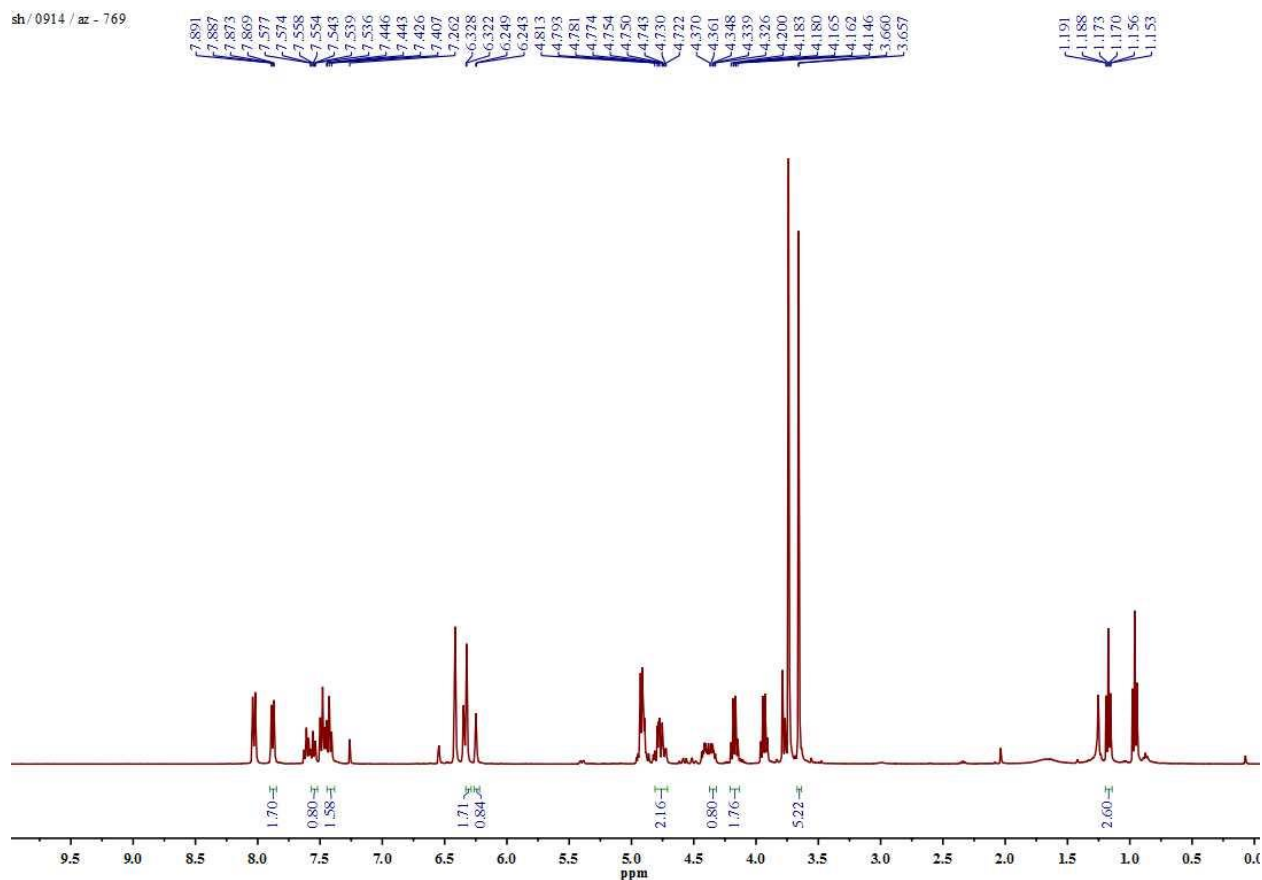

**<sup>1</sup>H NMR Spectrum of Compound **2i** (Minor Diastereoisomer) (400 MHz, CDCl<sub>3</sub>)**

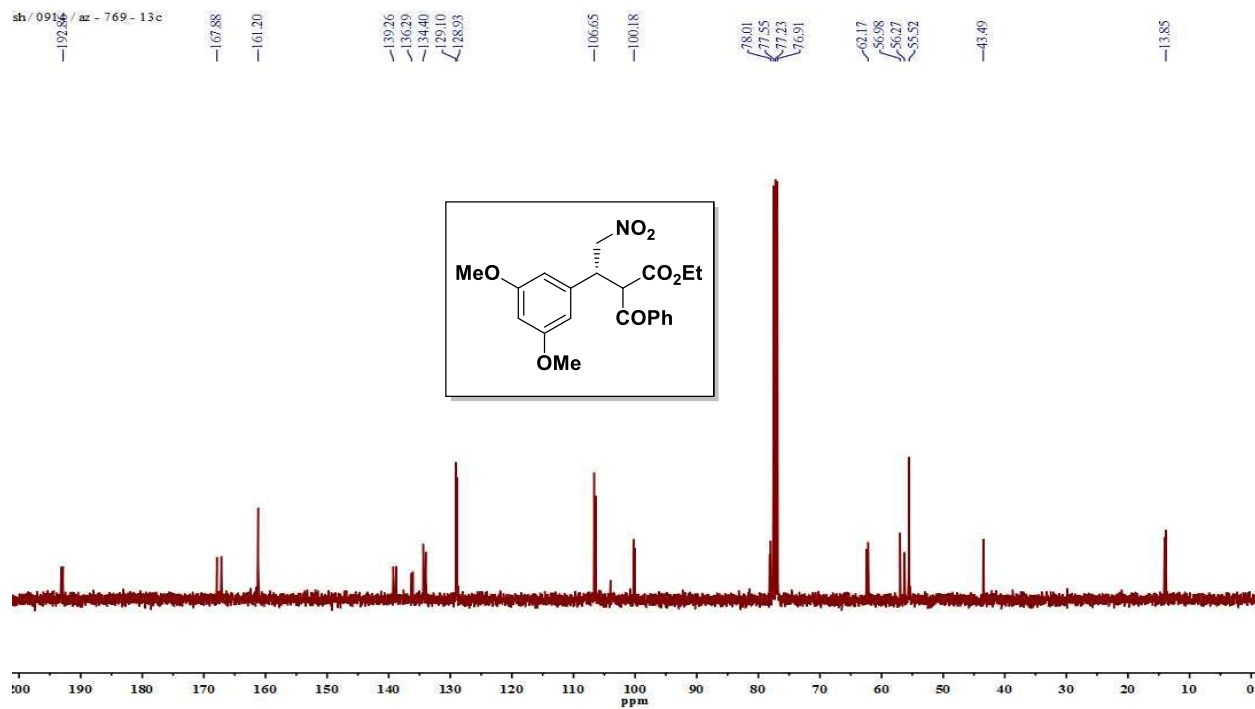

<sup>13</sup>C NMR Spectrum of Compound **2i** (100 MHz, CDCl<sub>3</sub>)

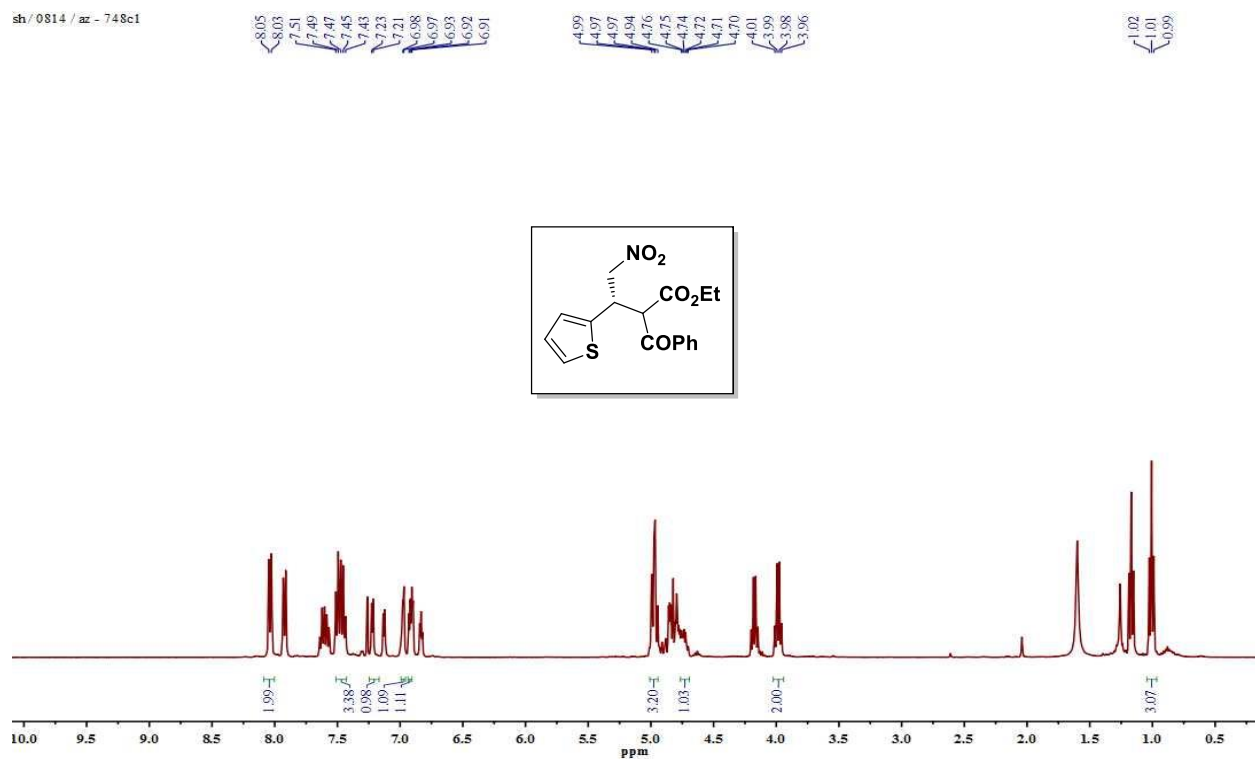

<sup>1</sup>H NMR Spectrum of Compound **2j** (Major Diastereoisomer) (400 MHz, CDCl<sub>3</sub>)



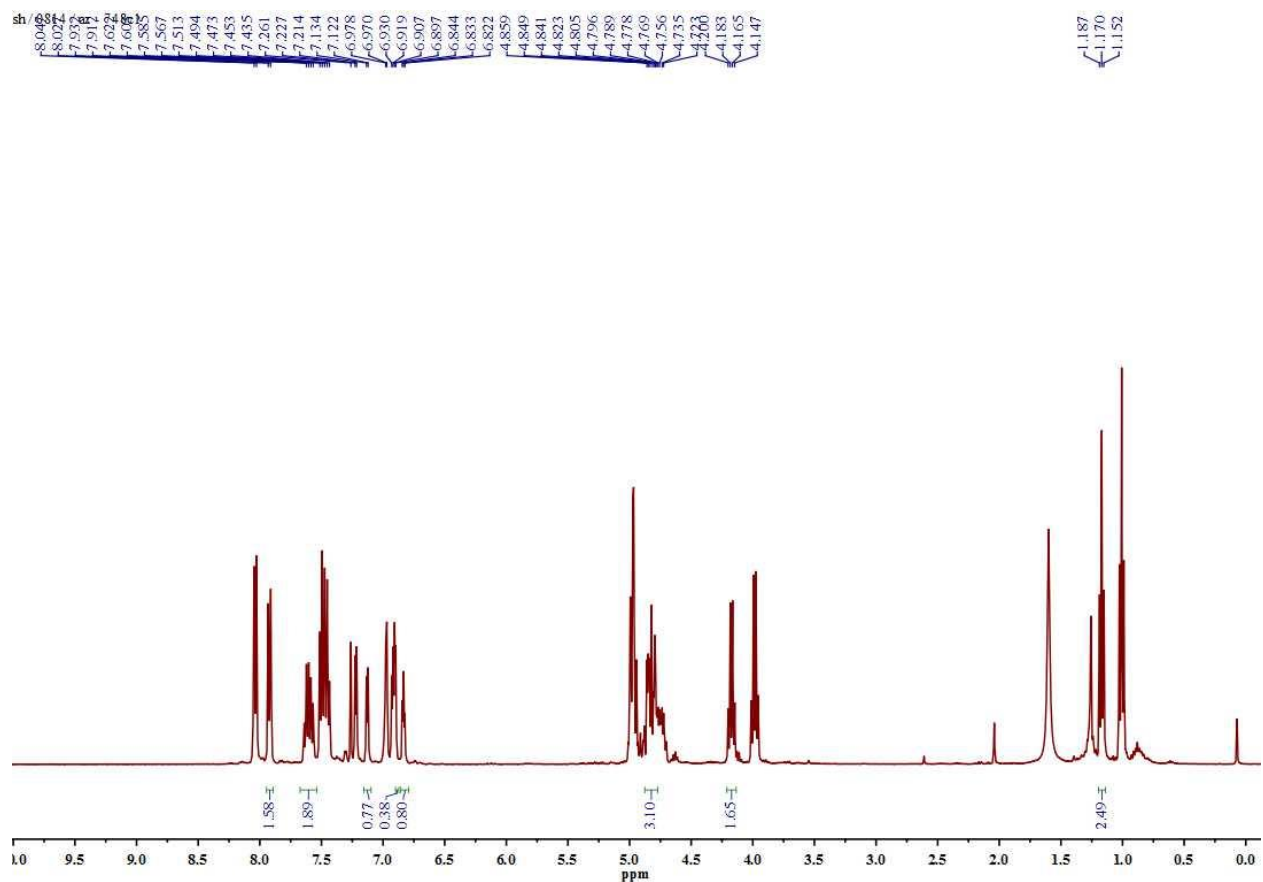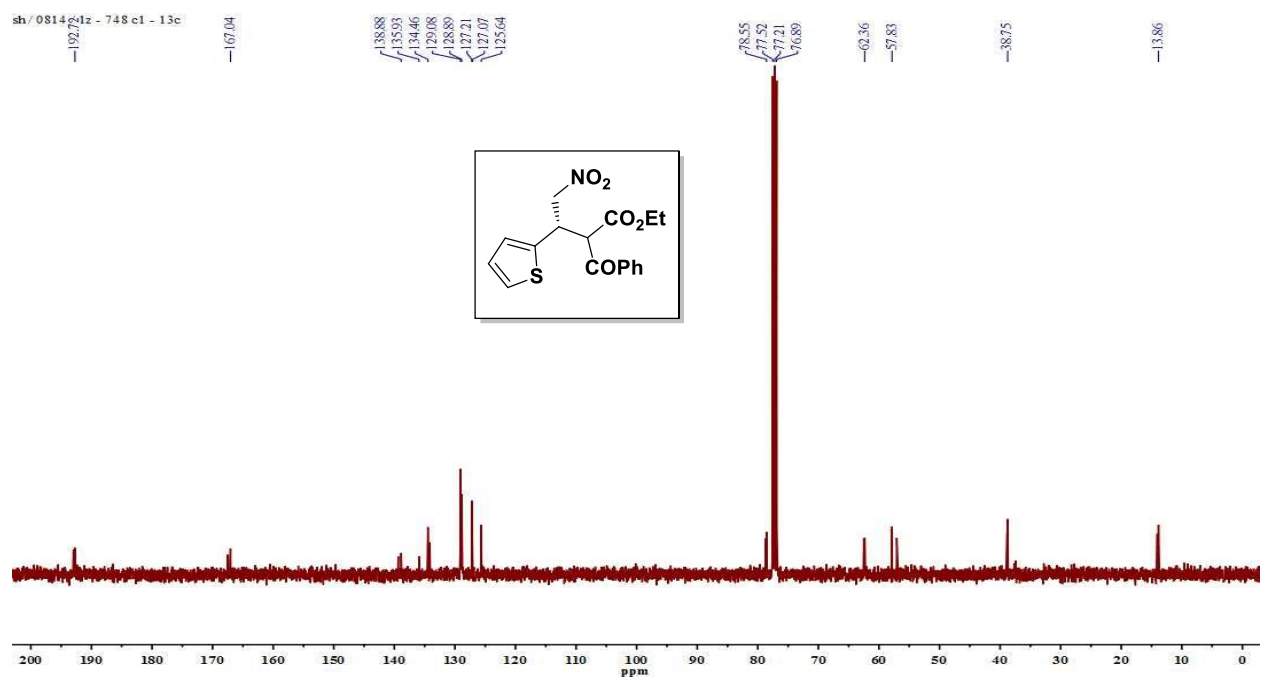

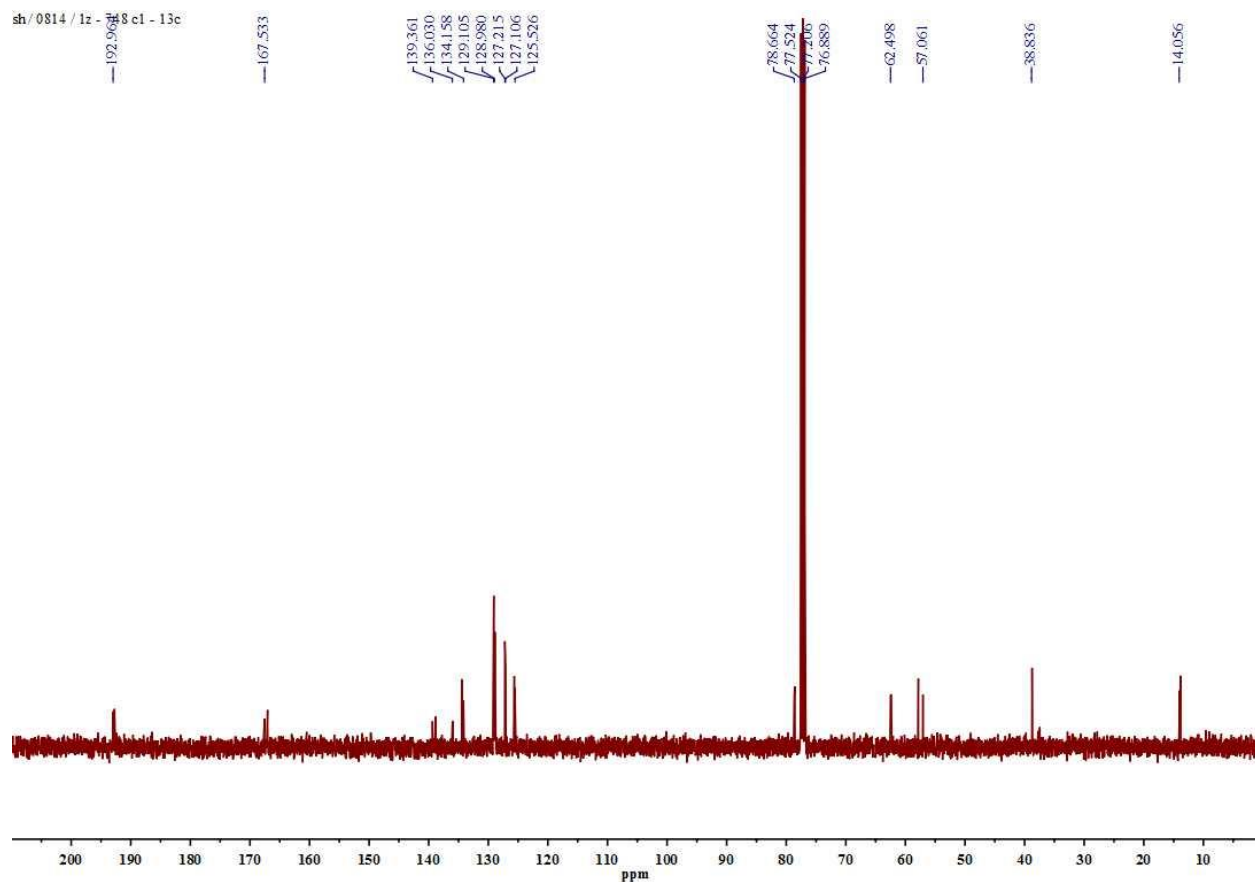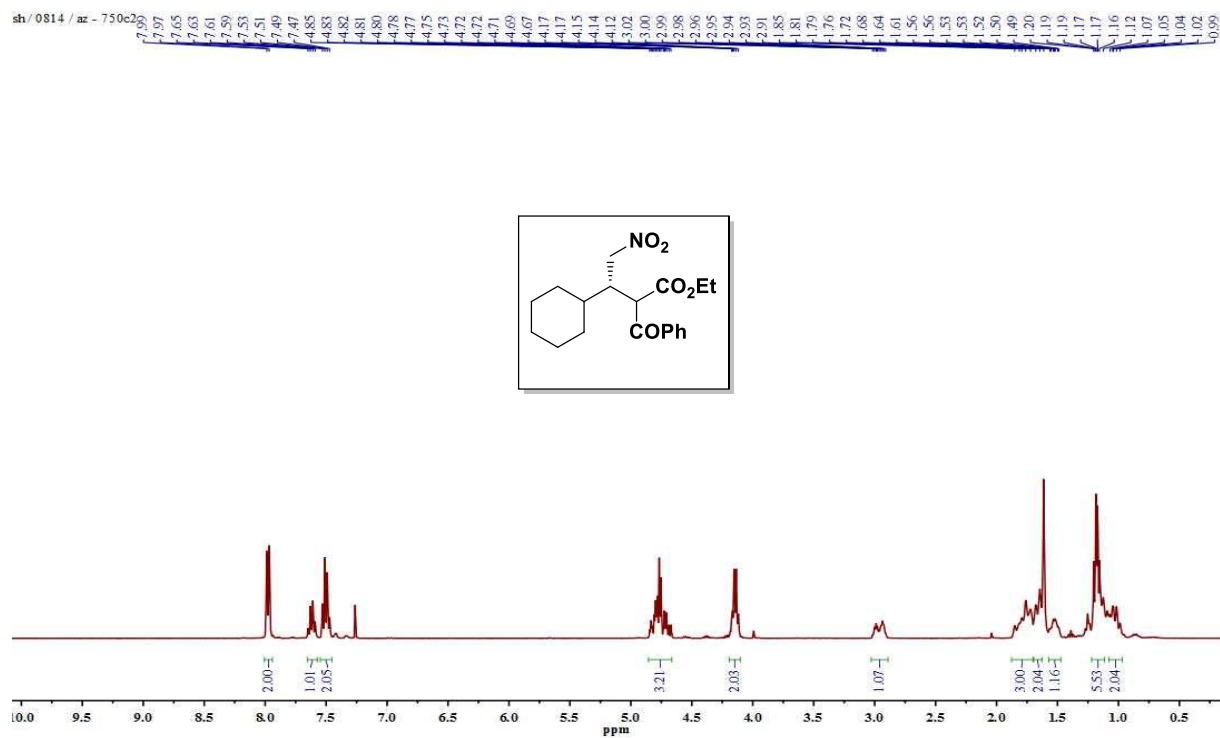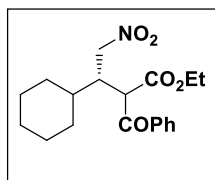

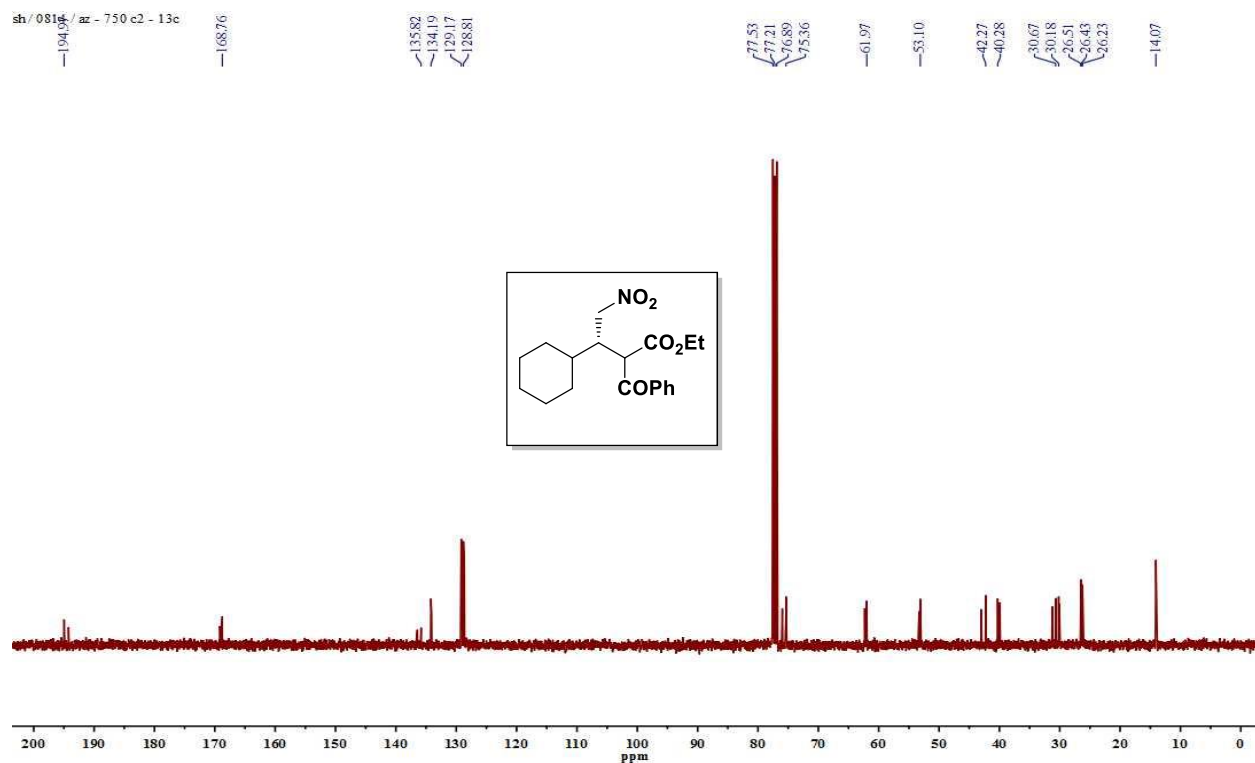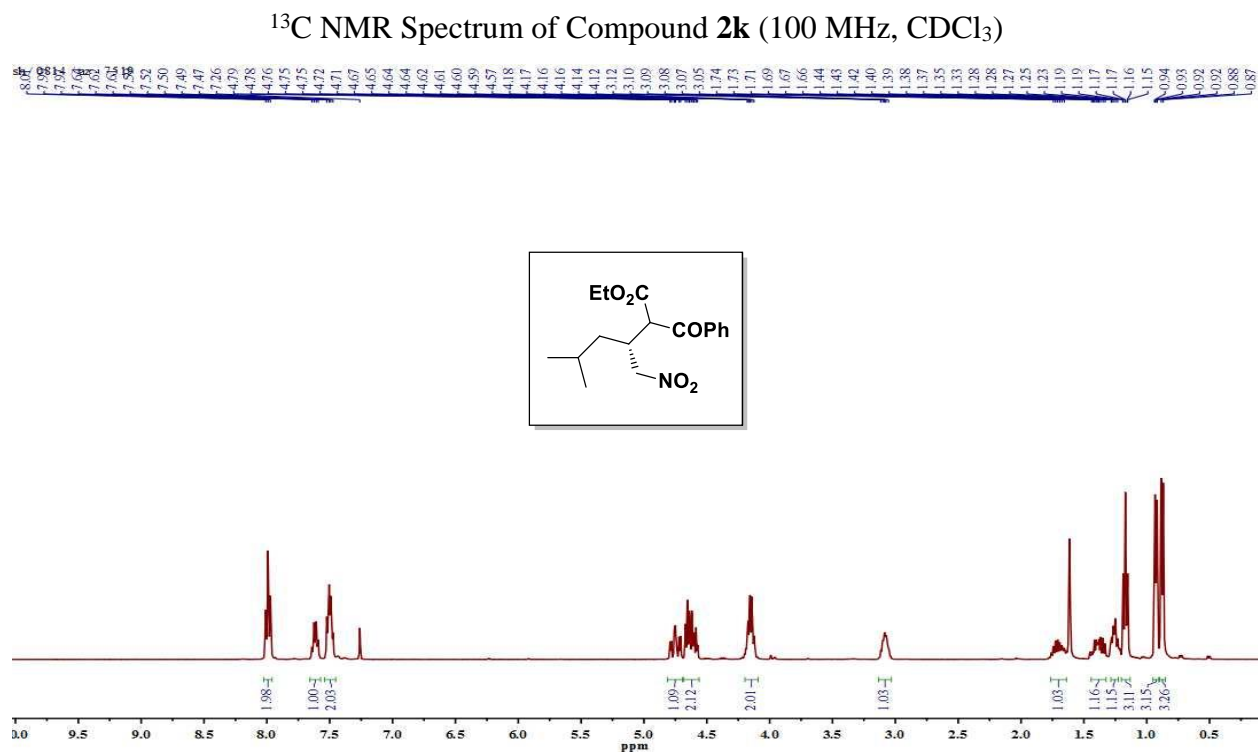

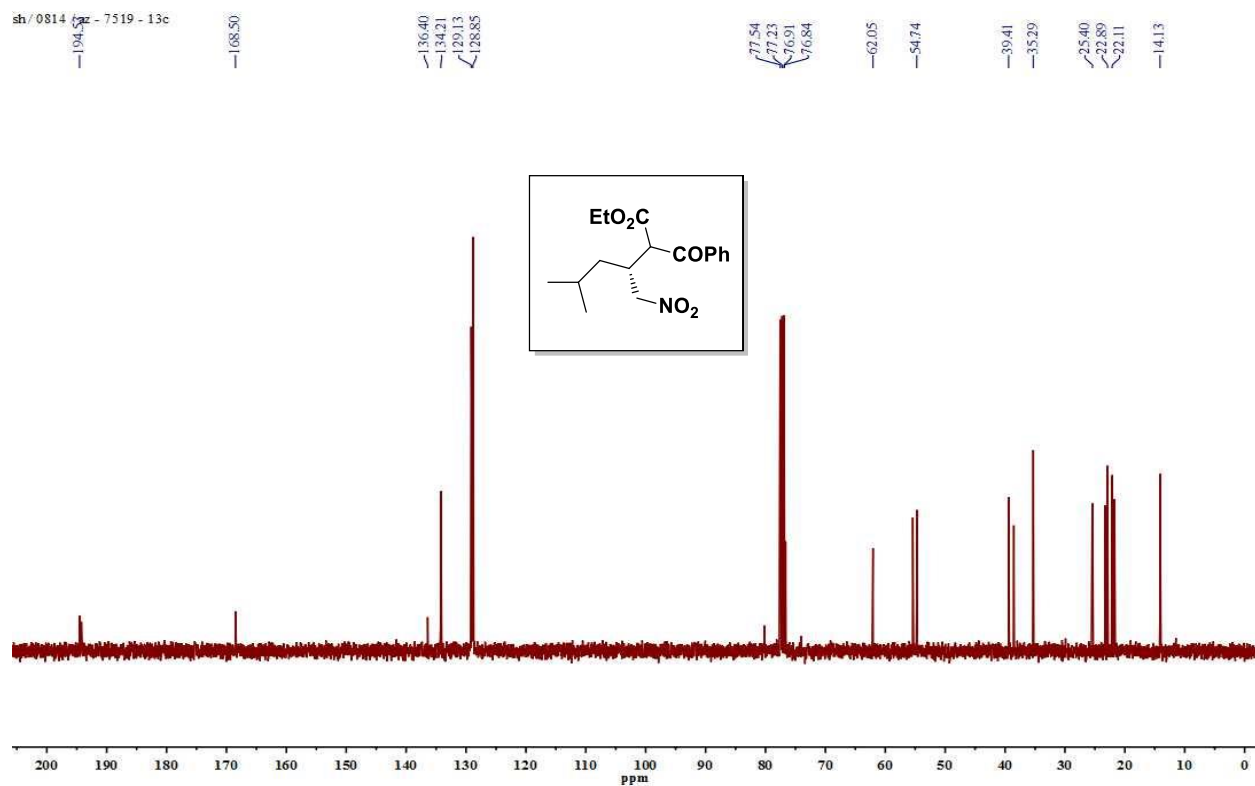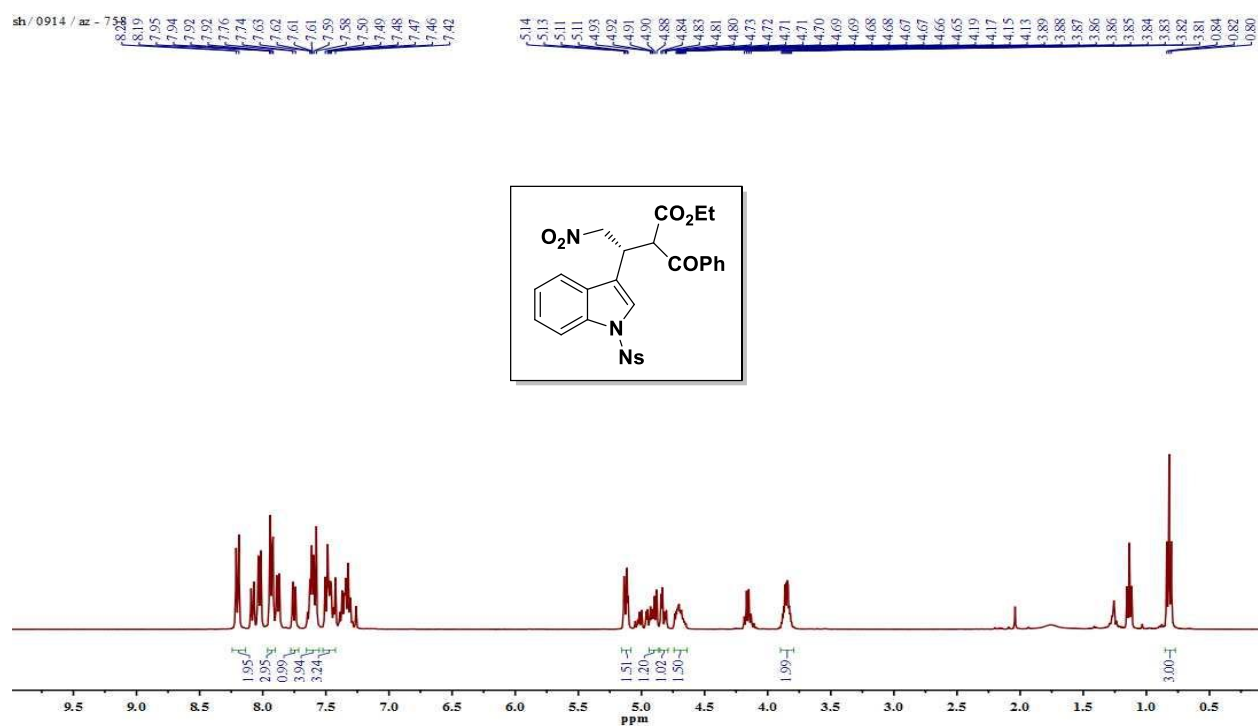

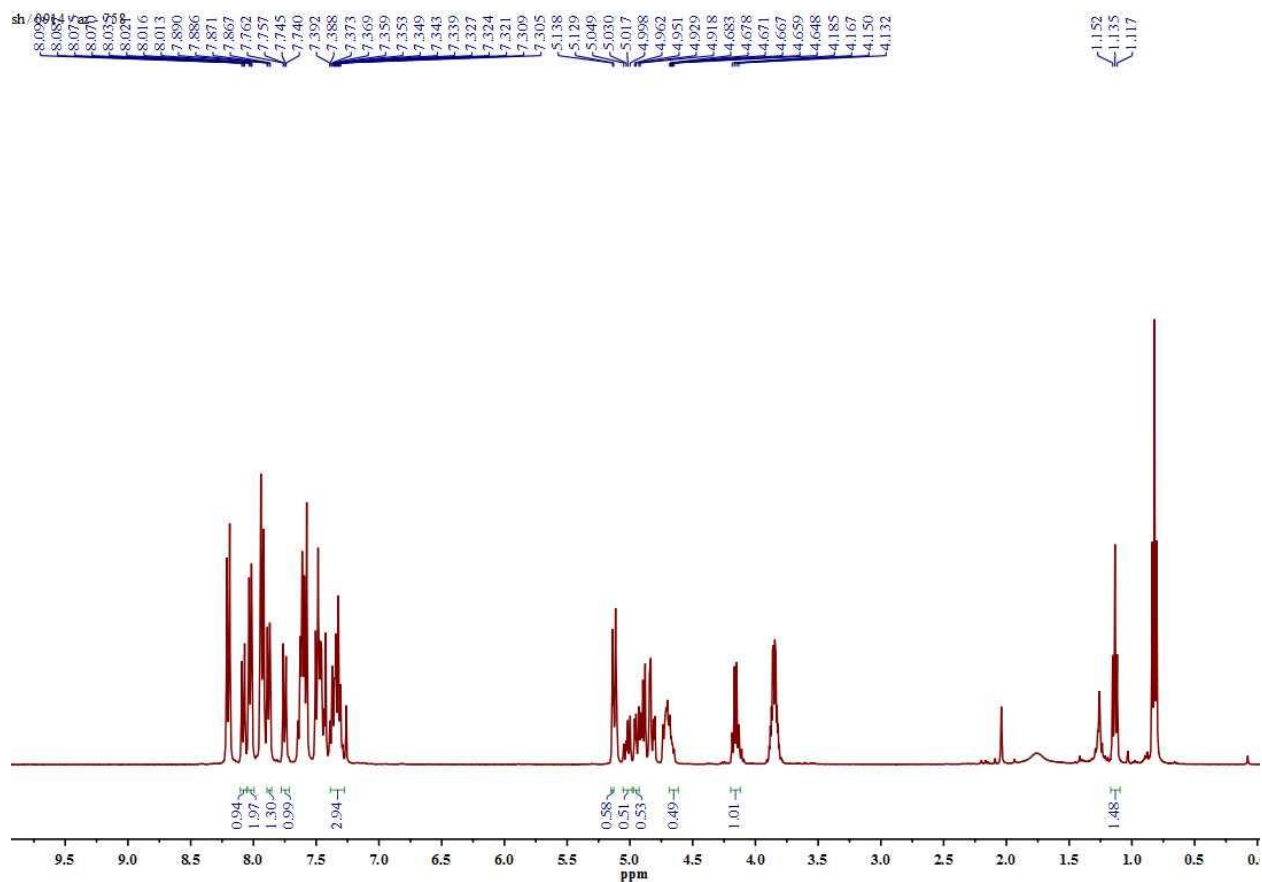

<sup>1</sup>H NMR Spectrum of Compound **2m** (Minor Diastereoisomer) (400 MHz, CDCl<sub>3</sub>)

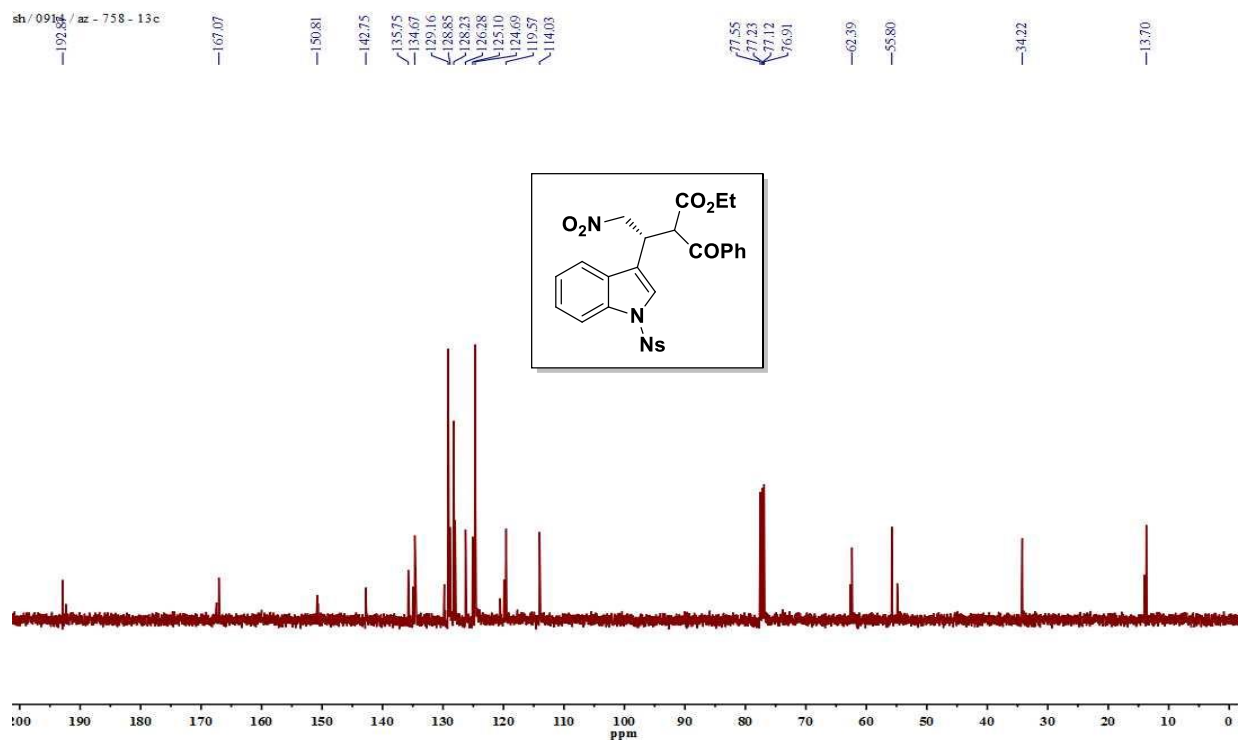

<sup>13</sup>C NMR Spectrum of Compound **2m** (Major Diastereoisomer) (100 MHz, CDCl<sub>3</sub>)

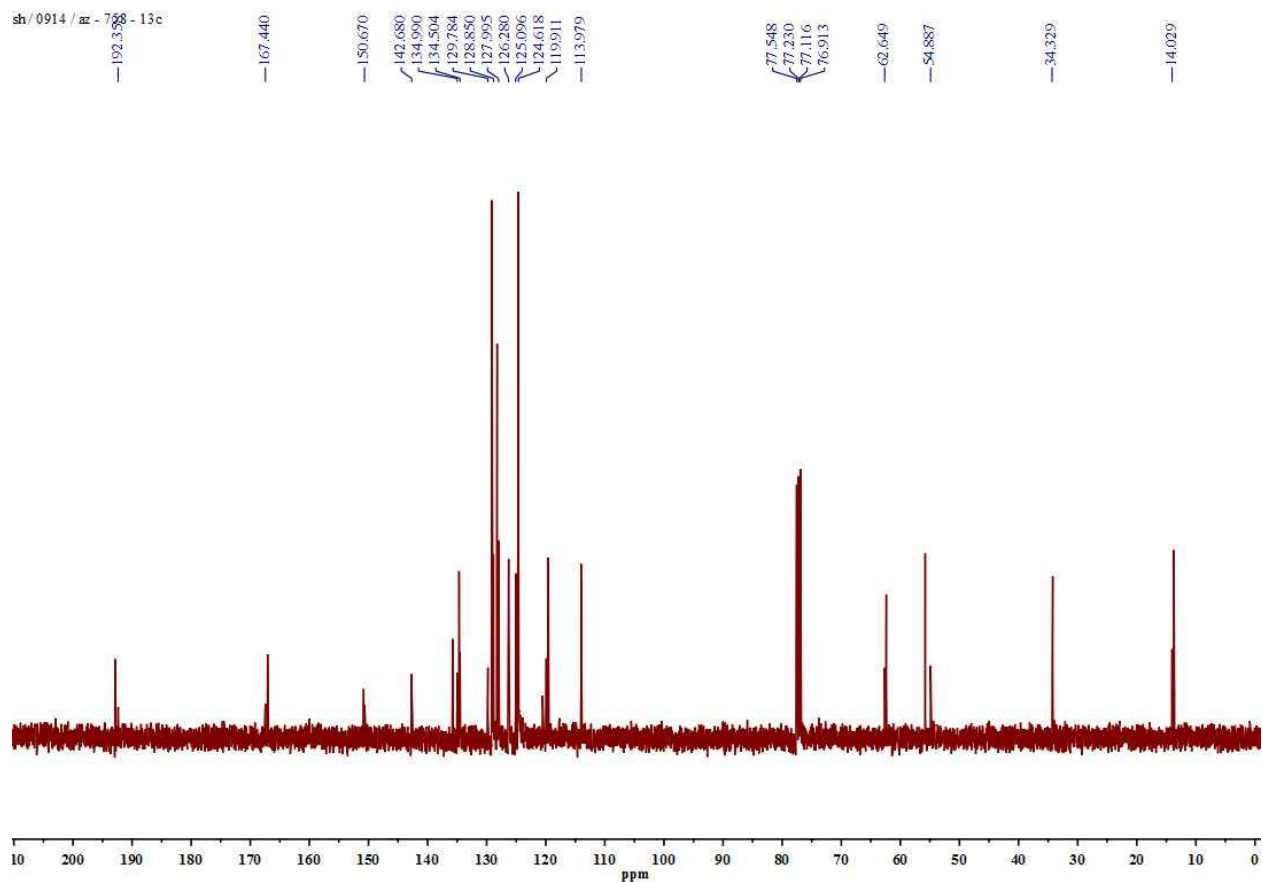

$^{13}\text{C}$  NMR Spectrum of Compound **2m** (Minor Diastereoisomer) (100 MHz,  $\text{CDCl}_3$ )

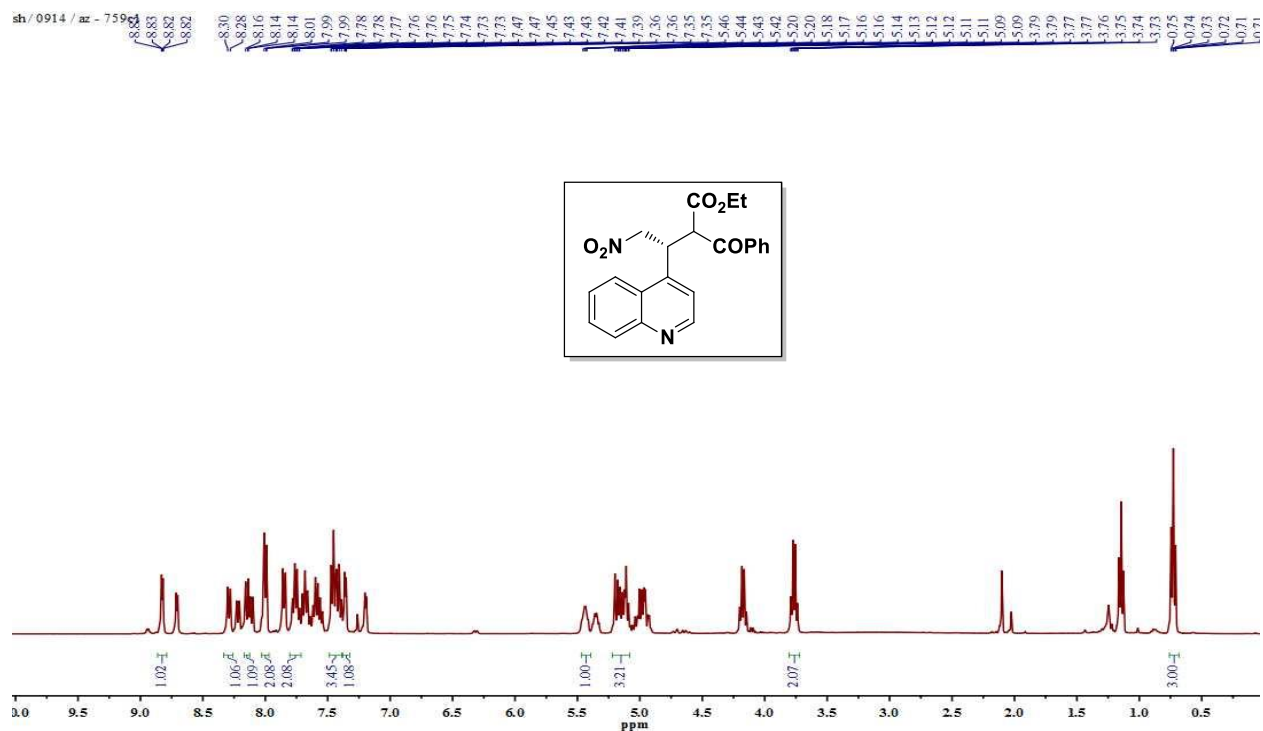

$^1\text{H}$  NMR Spectrum of Compound **2n** (Major Diastereoisomer) (400 MHz,  $\text{CDCl}_3$ )

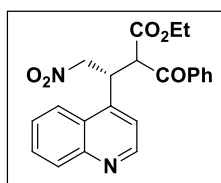

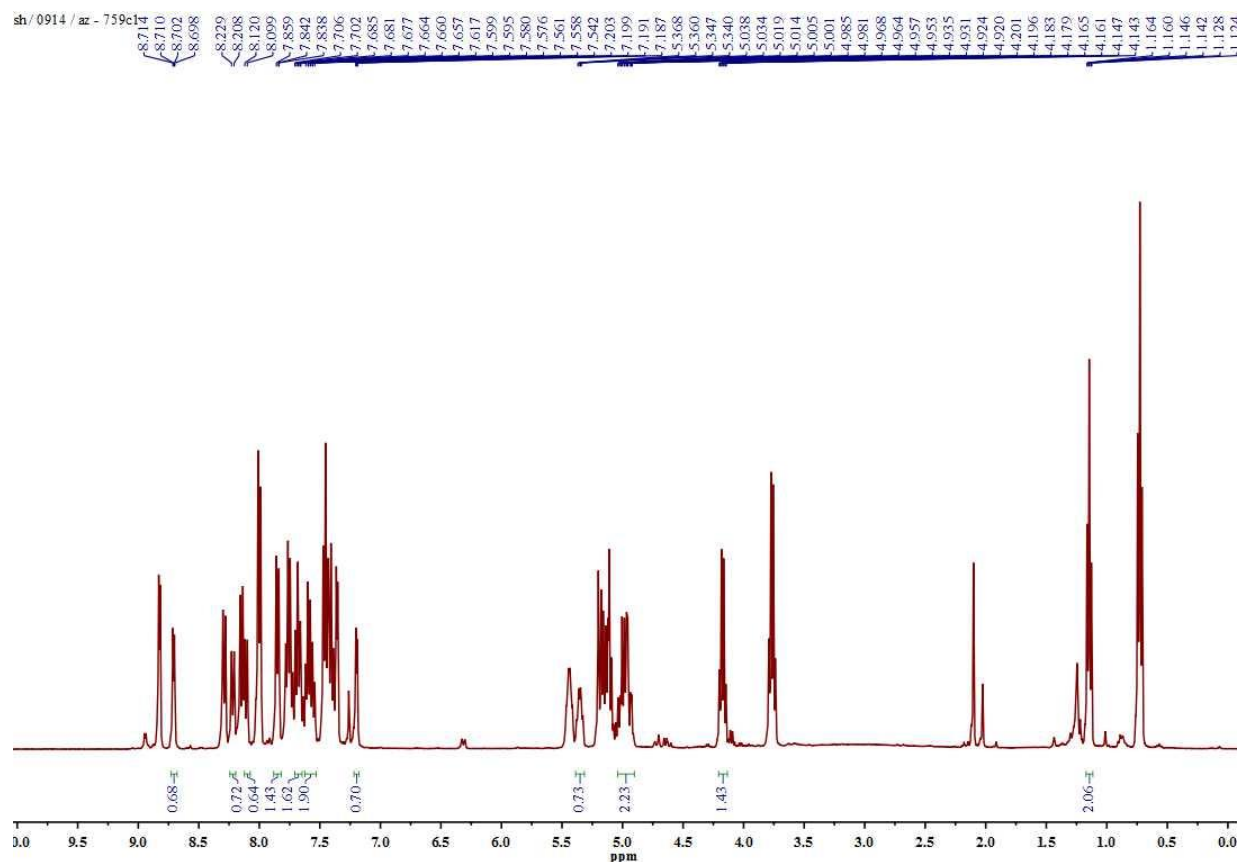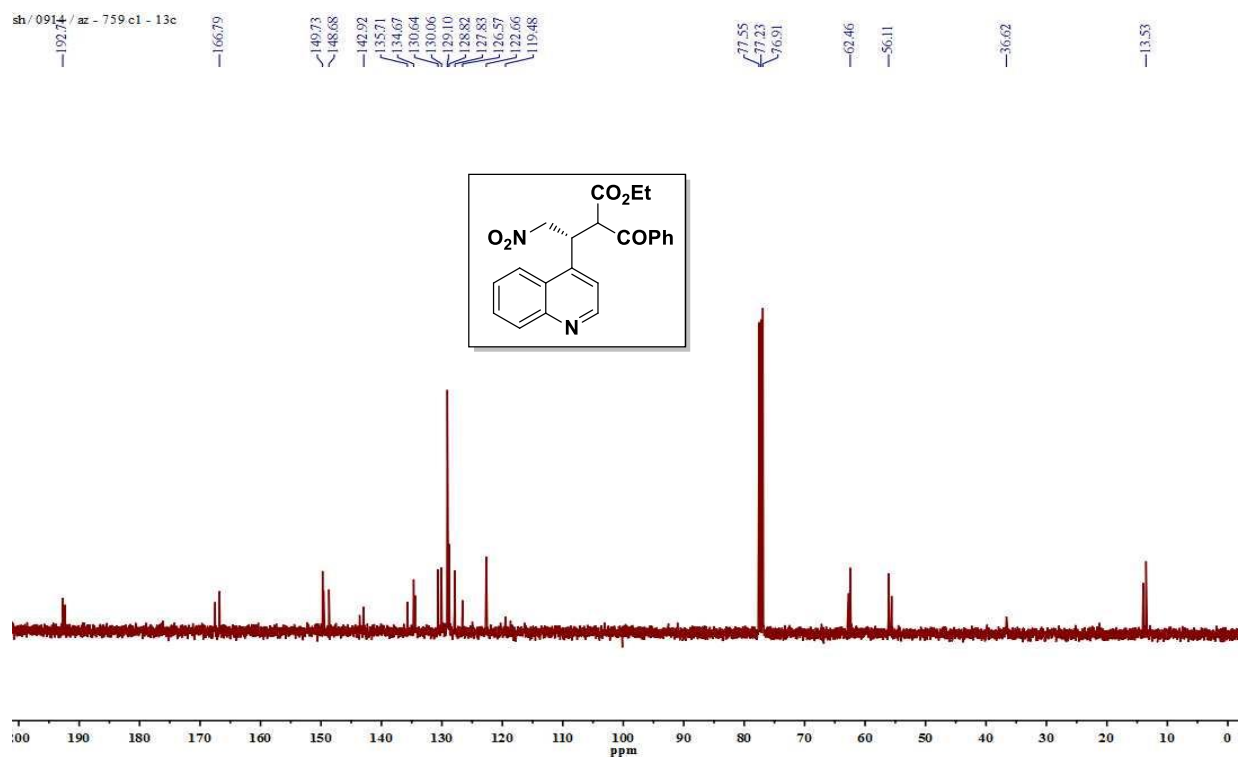

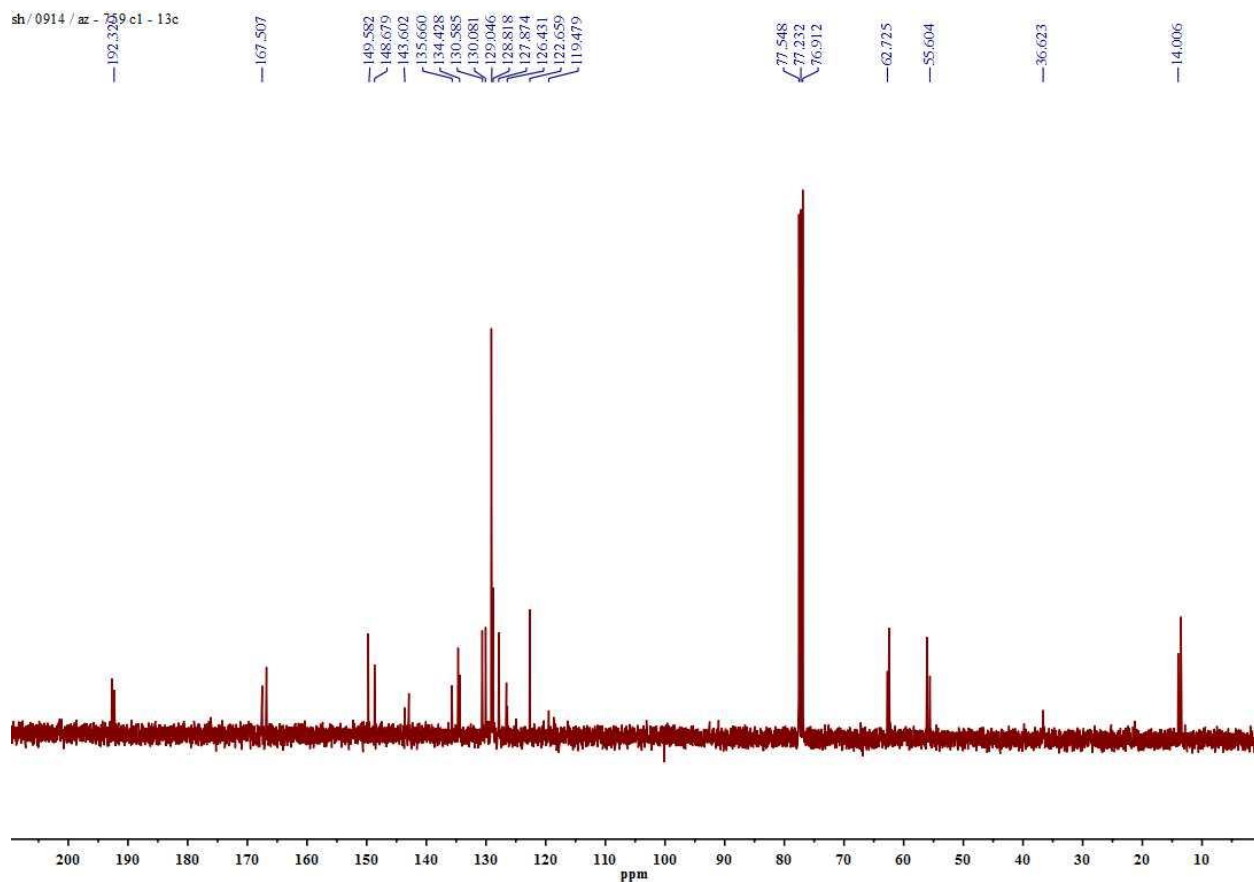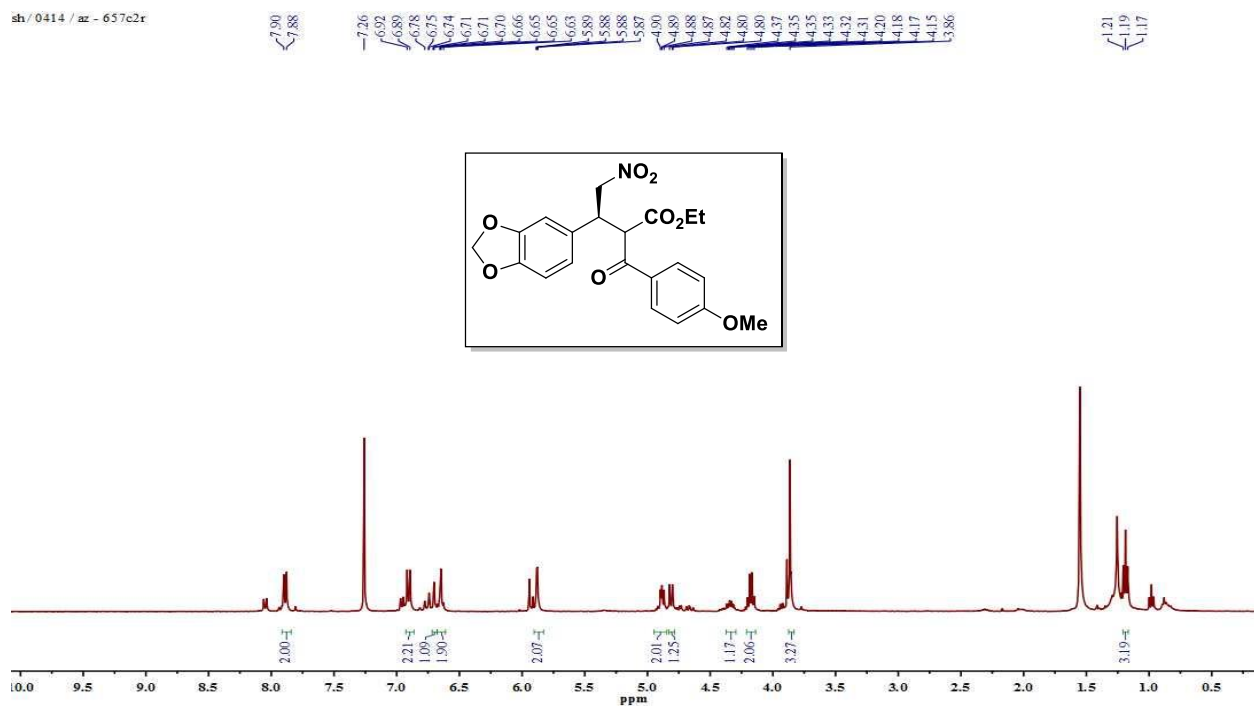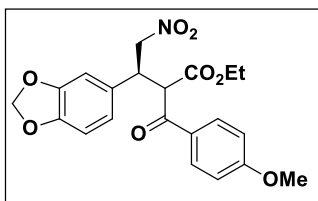



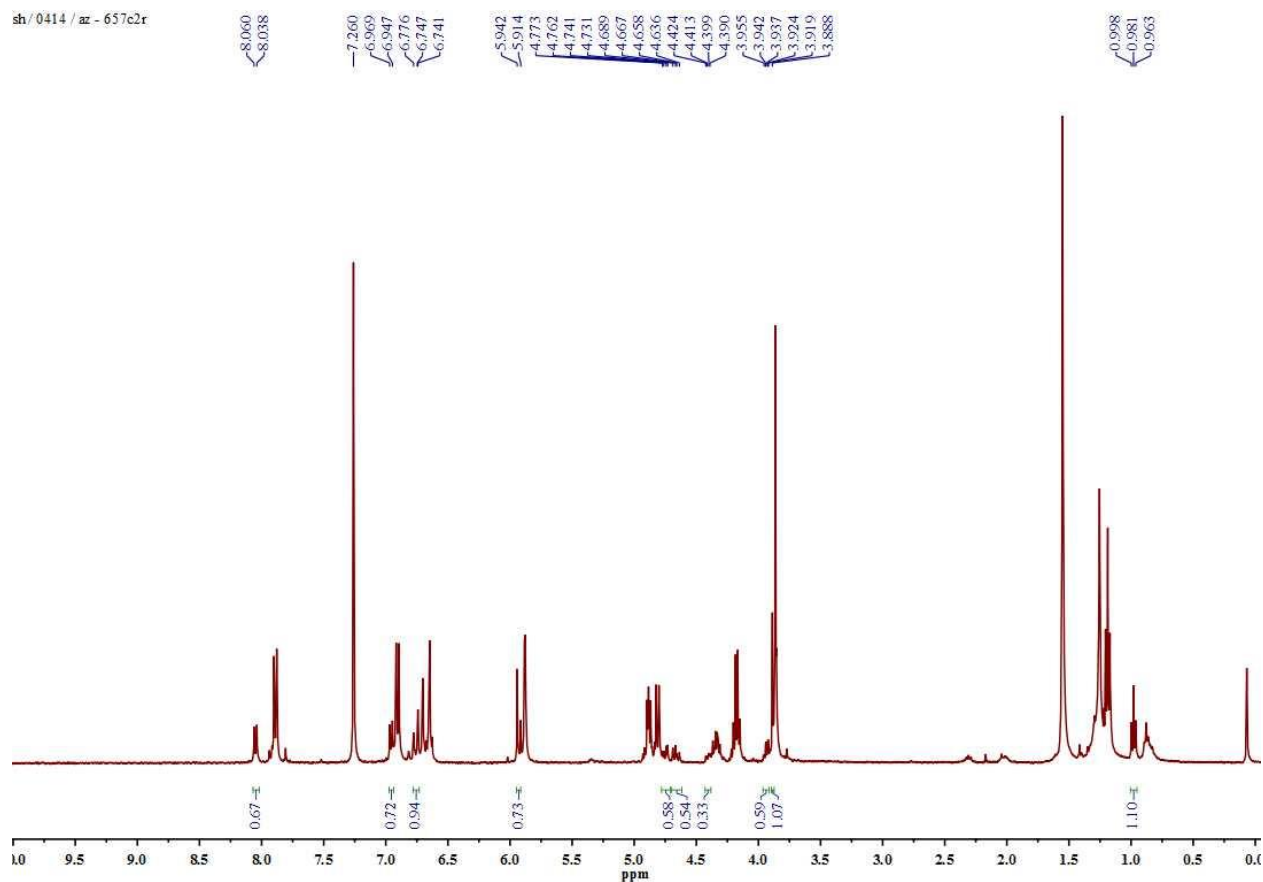

$^1\text{H}$  NMR Spectrum of Compound **2o** (Minor Diastereoisomer) (400 MHz,  $\text{CDCl}_3$ )

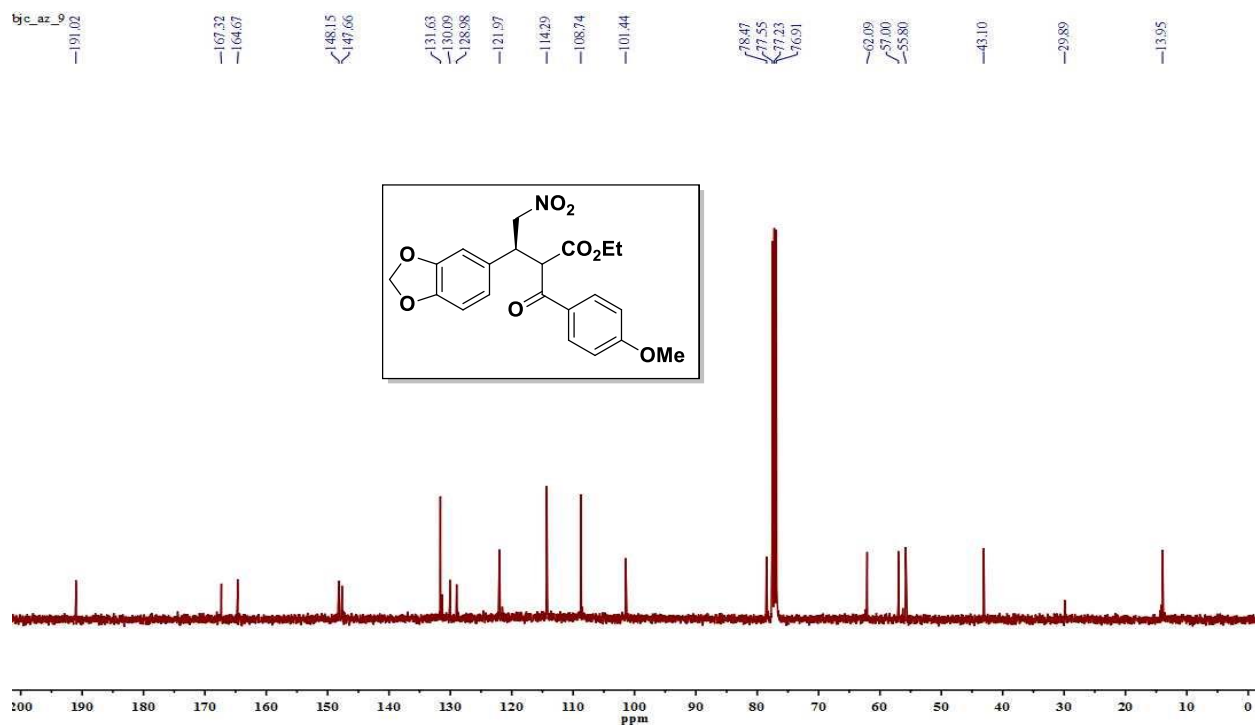

$^{13}\text{C}$  NMR Spectrum of Compound **2o** (Major Diastereoisomer) (100 MHz,  $\text{CDCl}_3$ )

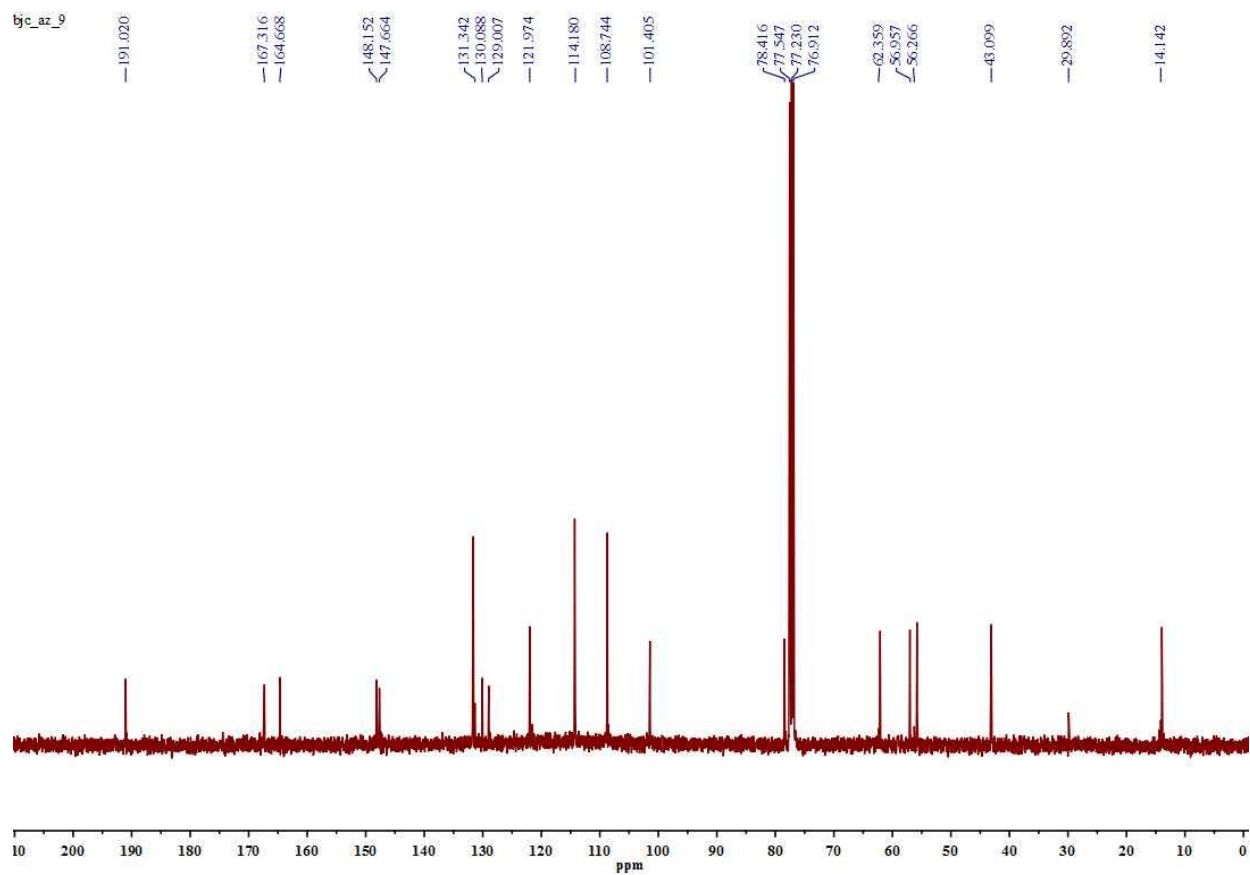

$^{13}\text{C}$  NMR Spectrum of Compound **2o** (Minor Diastereoisomer) (100 MHz,  $\text{CDCl}_3$ )

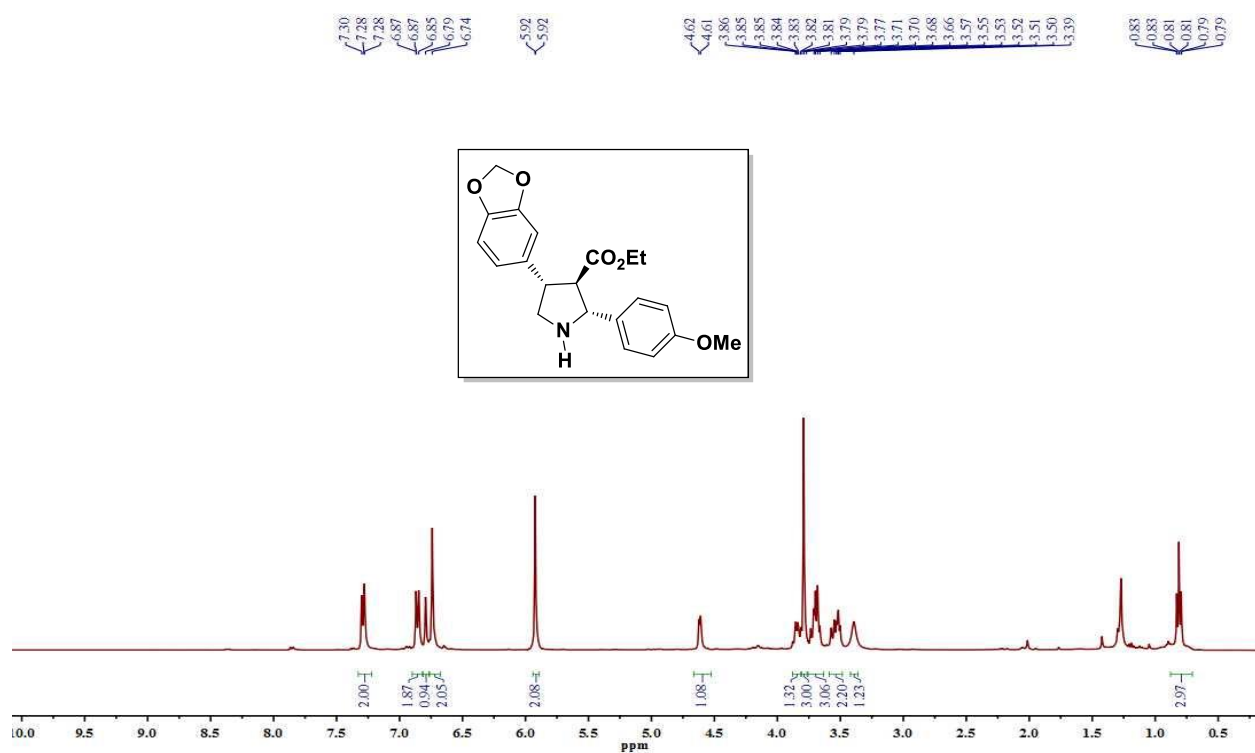

$^1\text{H}$  NMR Spectrum of Compound **7** (400 MHz,  $\text{CDCl}_3$ )

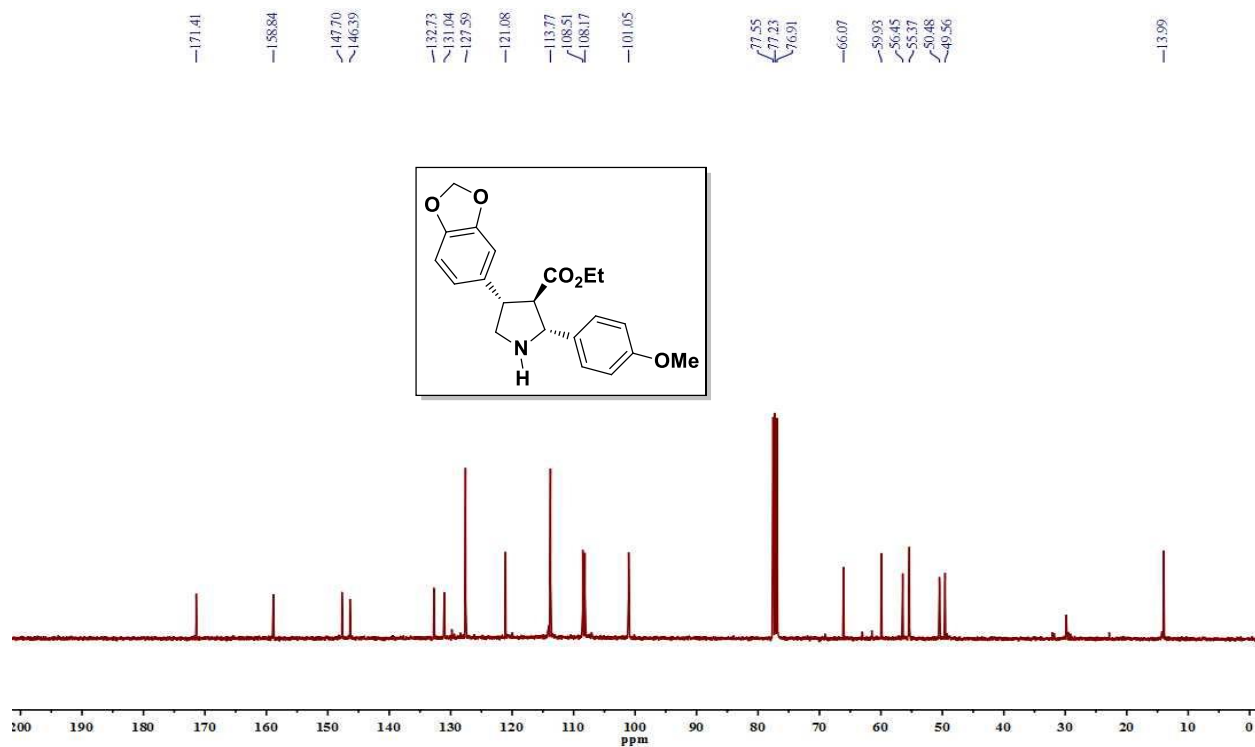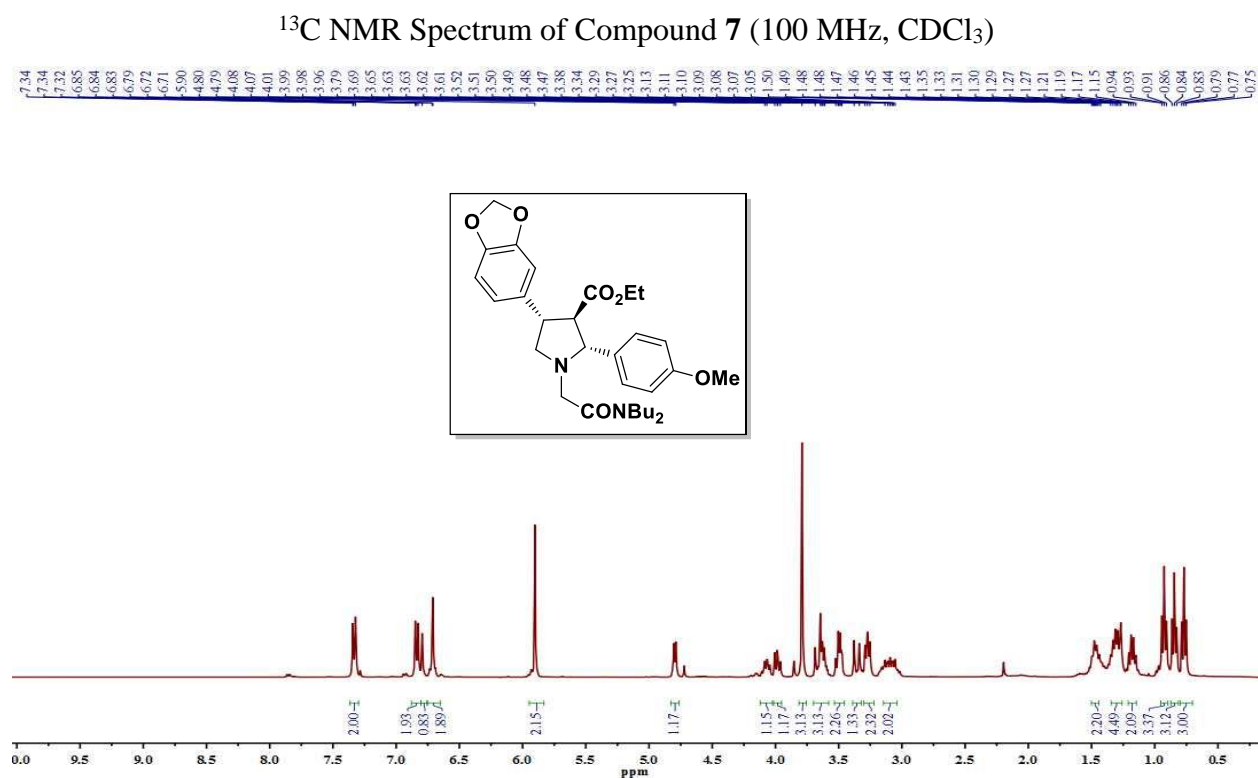

[illegible]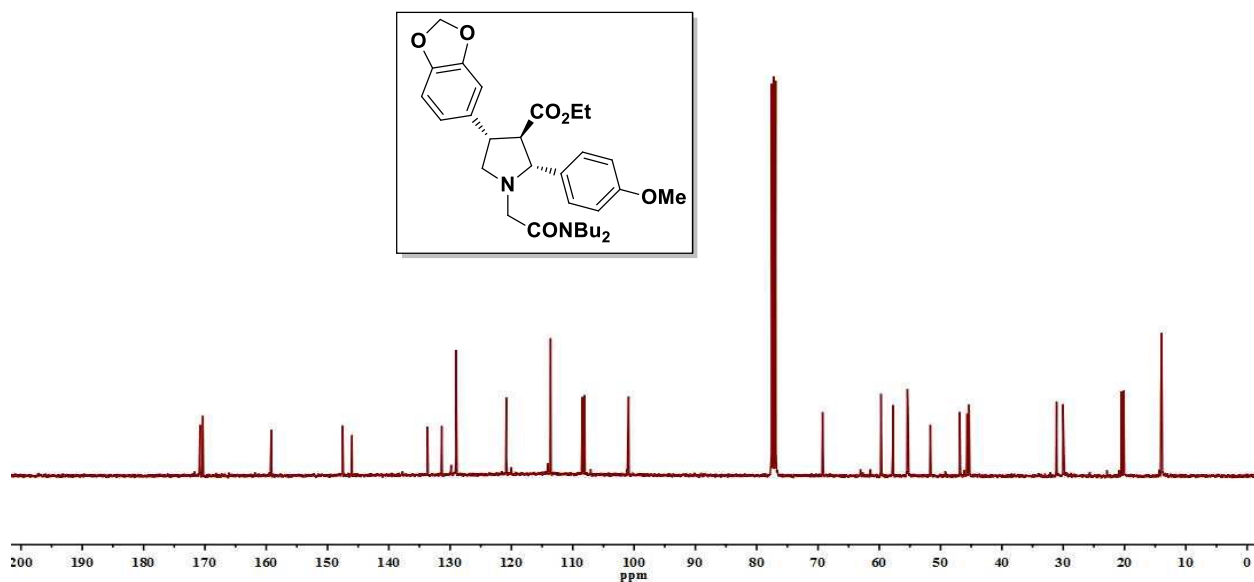

<sup>13</sup>C NMR Spectrum of Compound **8** (100 MHz, CDCl<sub>3</sub>)

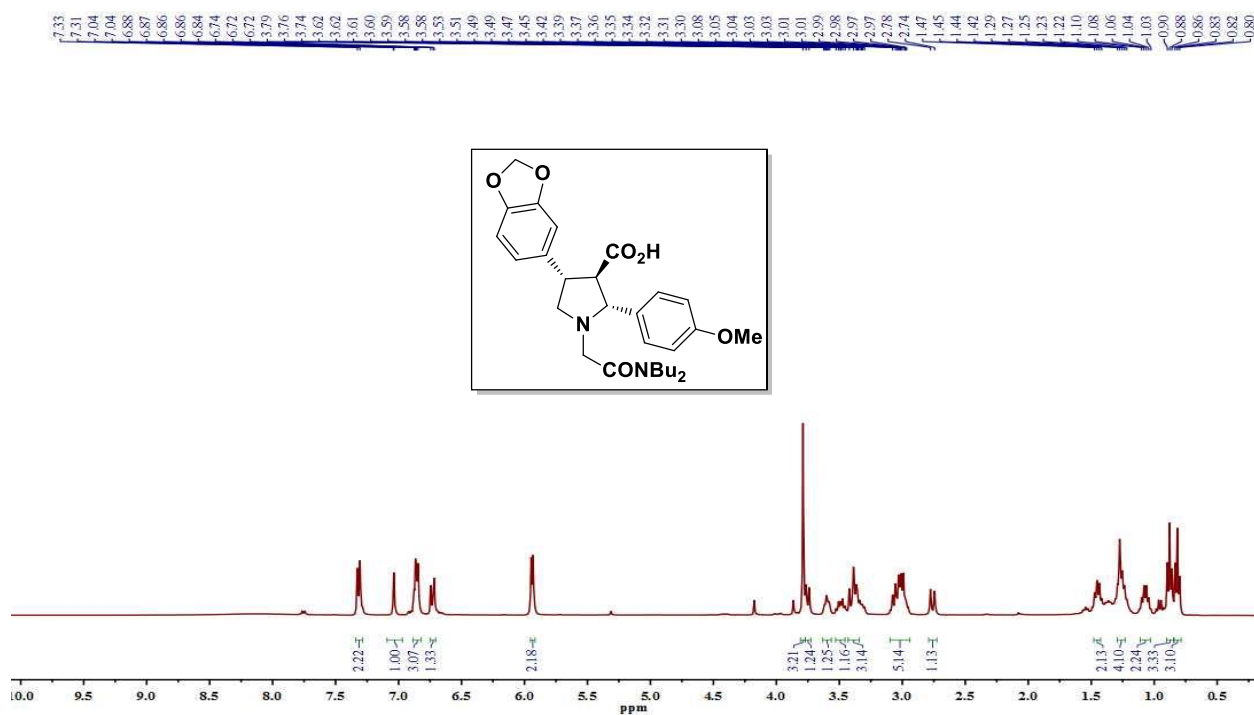<sup>1</sup>H NMR Spectrum of Compound **9** (**ABT-627**) (400 MHz, CDCl<sub>3</sub>)

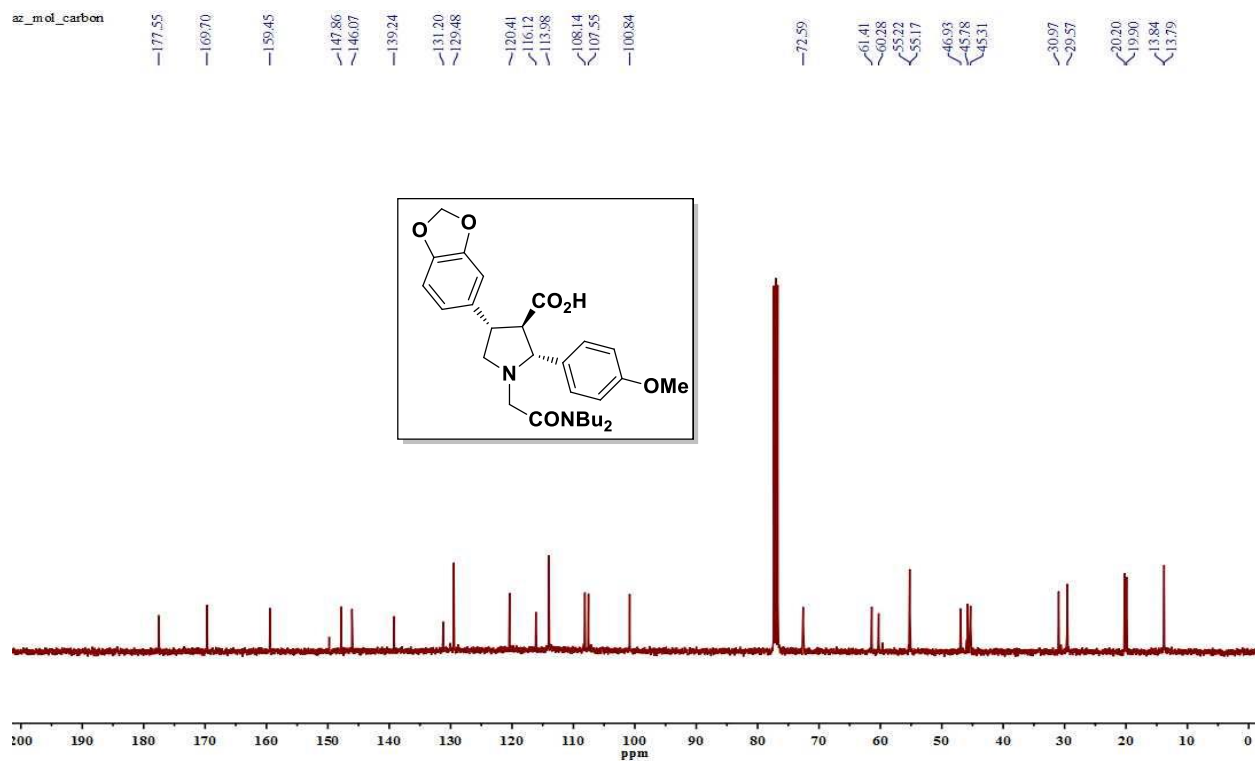

$^{13}\text{C}$  NMR Spectrum of Compound **9** (ABT-627) (100 MHz,  $\text{CDCl}_3$ )

## HPLC Chromatogram

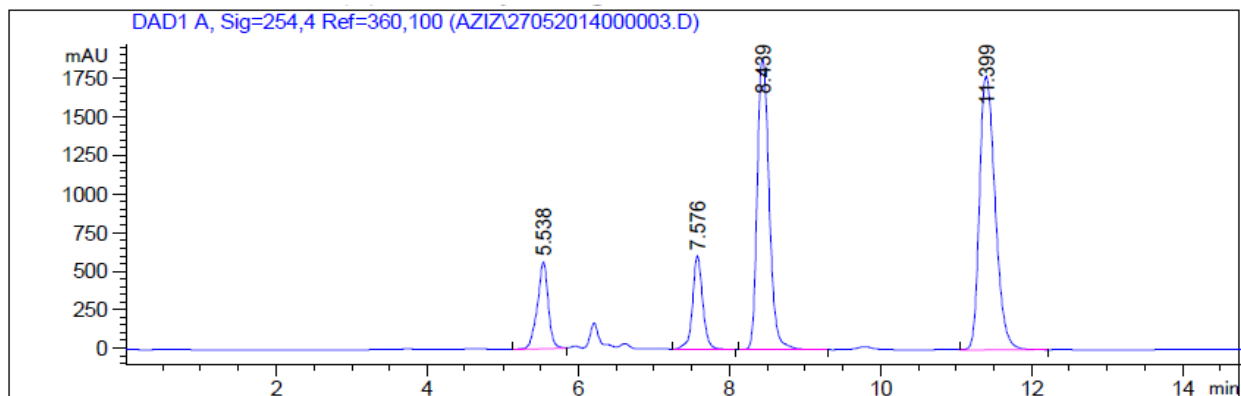

HPLC Chromatogram of Compound **2a** (catalyst **F**)

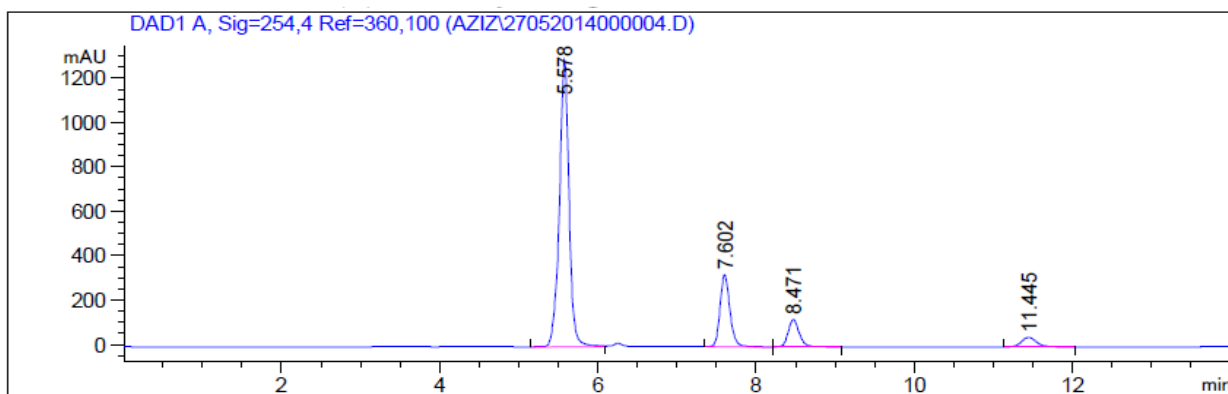

### Area Percent Report

Sorted By : Signal  
Multiplier : 1.0000  
Dilution : 1.0000  
Use Multiplier & Dilution Factor with ISTDs

Signal 1: DAD1 A, Sig=254,4 Ref=360,100

| Peak # | RetTime [min] | Type | Width [min] | Area [mAU*s] | Height [mAU] | Area %  |
|--------|---------------|------|-------------|--------------|--------------|---------|
| 1      | 5.578         | BV   | 0.1271      | 1.09664e4    | 1291.38562   | 70.6129 |
| 2      | 7.602         | VB   | 0.1330      | 2814.12988   | 325.04605    | 18.1203 |
| 3      | 8.471         | BB   | 0.1469      | 1189.12573   | 122.90531    | 7.6568  |
| 4      | 11.445        | BB   | 0.1992      | 560.62067    | 43.25634     | 3.6099  |

HPLC Chromatogram of Compound **2a** (catalyst **H**)

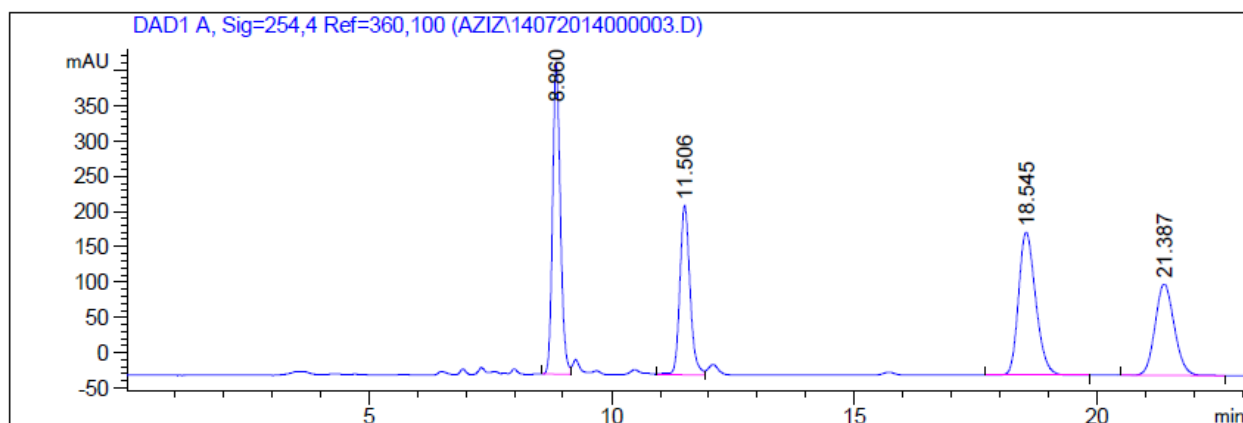

HPLC Chromatogram of Compound **2b** (catalyst **F**)

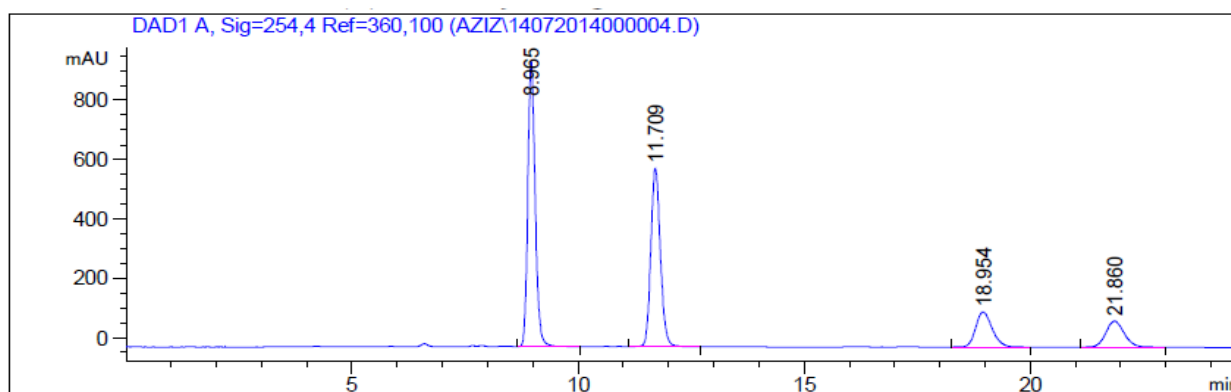

=====  
Area Percent Report  
=====

Sorted By : Signal  
Multiplier : 1.0000  
Dilution : 1.0000  
Use Multiplier & Dilution Factor with ISTDs

Signal 1: DAD1 A, Sig=254,4 Ref=360,100

| Peak # | RetTime [min] | Type | Width [min] | Area [mAU*s] | Height [mAU] | Area %  |
|--------|---------------|------|-------------|--------------|--------------|---------|
| 1      | 8.965         | VB   | 0.1748      | 1.09495e4    | 961.63416    | 43.3251 |
| 2      | 11.709        | BB   | 0.2257      | 8857.30371   | 601.97253    | 35.0467 |
| 3      | 18.954        | BB   | 0.3936      | 2993.21436   | 118.13834    | 11.8436 |
| 4      | 21.860        | BB   | 0.4395      | 2472.86450   | 87.56722     | 9.7847  |

HPLC Chromatogram of Compound **2b** (catalyst **H**)

Additional Info : Peak(s) manually integrated

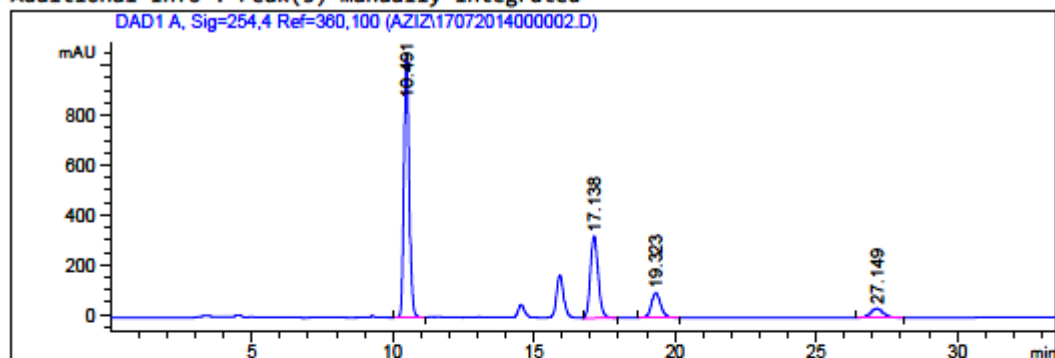

=====  
Area Percent Report  
=====

Sorted By : Signal  
Multiplier : 1.0000  
Dilution : 1.0000  
Use Multiplier & Dilution Factor with ISTDs

Signal 1: DAD1 A, Sig=254,4 Ref=360,100

| Peak # | RetTime [min] | Type | Width [min] | Area [mAU*s] | Height [mAU] | Area %  |
|--------|---------------|------|-------------|--------------|--------------|---------|
| 1      | 10.491        | BB   | 0.1978      | 1.34707e4    | 1049.05823   | 58.4579 |
| 2      | 17.138        | BB   | 0.2966      | 6259.89355   | 328.07233    | 27.1657 |
| 3      | 19.323        | BB   | 0.3443      | 2210.84521   | 99.09370     | 9.5943  |
| 4      | 27.149        | BB   | 0.4696      | 1101.96289   | 35.95162     | 4.7821  |

HPLC Chromatogram of Compound **2c** (catalyst **F**)



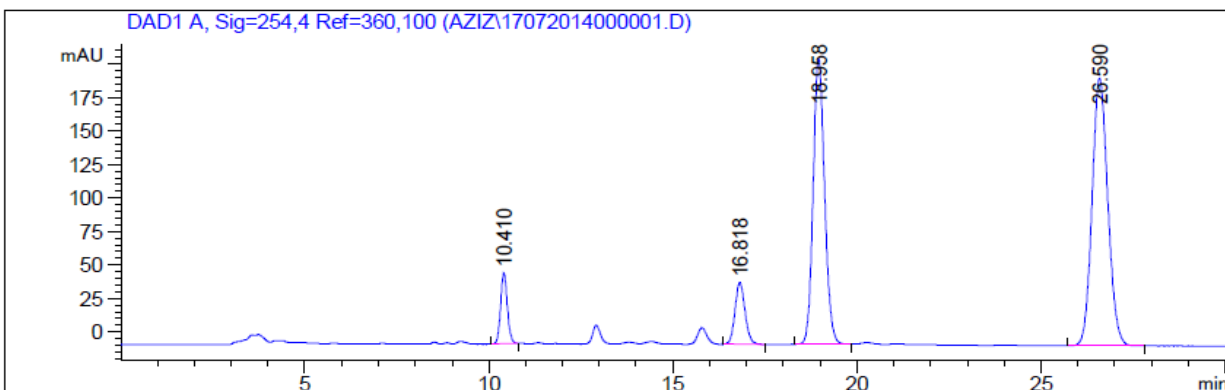

=====  
 Area Percent Report  
 =====

Sorted By : Signal  
 Multiplier : 1.0000  
 Dilution : 1.0000  
 Use Multiplier & Dilution Factor with ISTDs

Signal 1: DAD1 A, Sig=254,4 Ref=360,100

| Peak # | RetTime [min] | Type | Width [min] | Area [mAU*s] | Height [mAU] | Area %  |
|--------|---------------|------|-------------|--------------|--------------|---------|
| 1      | 10.410        | BB   | 0.1957      | 672.51135    | 53.13678     | 5.5600  |
| 2      | 16.818        | BB   | 0.2886      | 870.13617    | 46.01580     | 7.1938  |
| 3      | 18.958        | BB   | 0.3341      | 4607.40625   | 213.23586    | 38.0915 |
| 4      | 26.590        | BB   | 0.4594      | 5945.58057   | 199.64818    | 49.1548 |

HPLC Chromatogram of Compound **2c** (catalyst **H**)

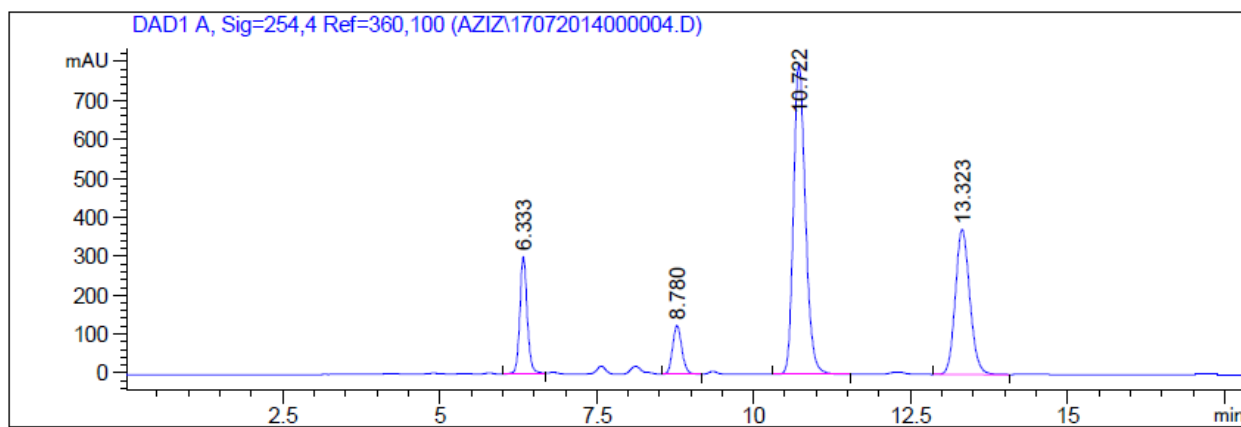

HPLC Chromatogram of Compound **2d** (catalyst **F**)

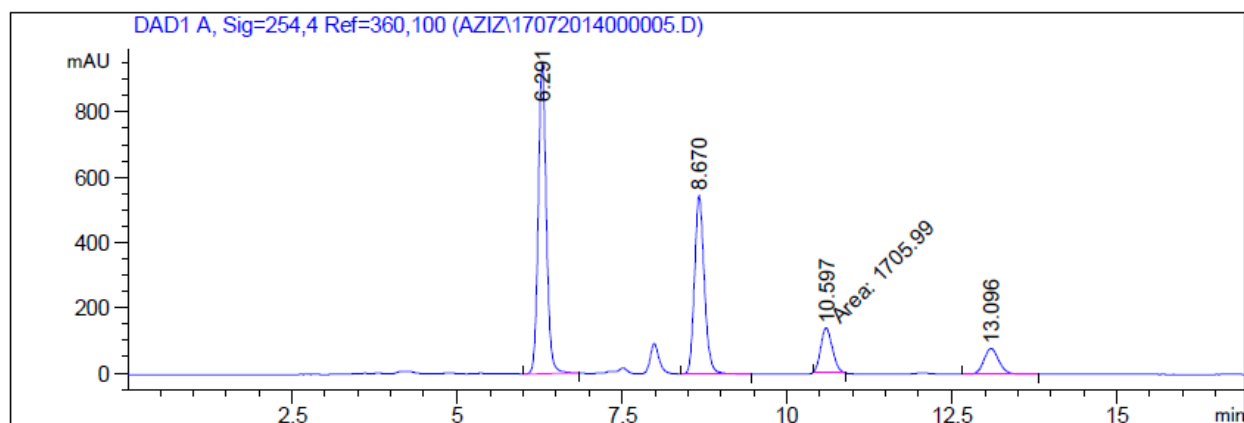

=====  
 Area Percent Report  
 =====

Sorted By : Signal  
 Multiplier : 1.0000  
 Dilution : 1.0000  
 Use Multiplier & Dilution Factor with ISTDs

Signal 1: DAD1 A, Sig=254,4 Ref=360,100

| Peak # | RetTime [min] | Type | Width [min] | Area [mAU*s] | Height [mAU] | Area %  |
|--------|---------------|------|-------------|--------------|--------------|---------|
| 1      | 6.291         | BB   | 0.1291      | 8047.50488   | 947.17084    | 48.2571 |
| 2      | 8.670         | BB   | 0.1593      | 5670.91504   | 545.29535    | 34.0058 |
| 3      | 10.597        | MM   | 0.2056      | 1705.99304   | 138.32527    | 10.2300 |
| 4      | 13.096        | BB   | 0.2446      | 1251.89551   | 79.12386     | 7.5070  |

HPLC Chromatogram of Compound **2d** (catalyst **H**)

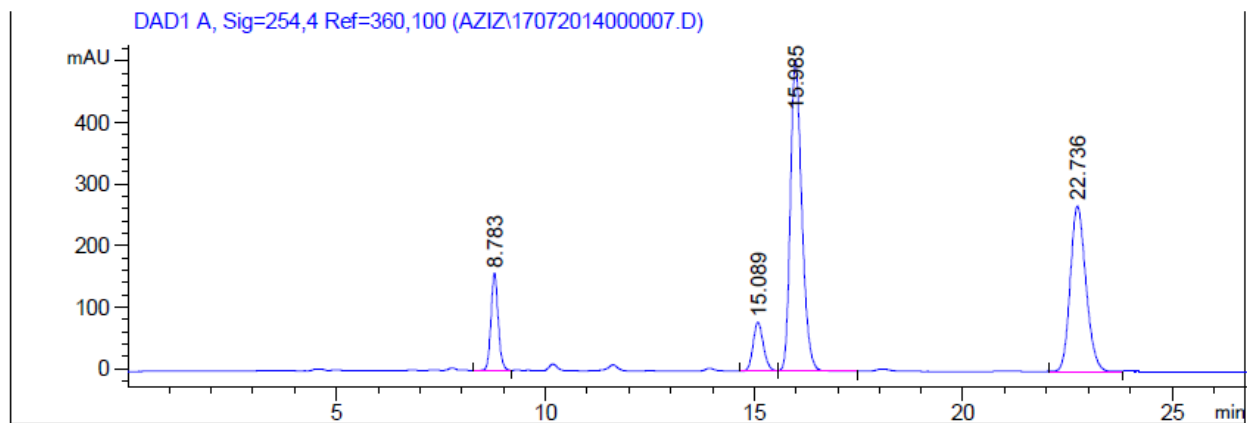

HPLC Chromatogram of Compound **2e** (catalyst **F**)

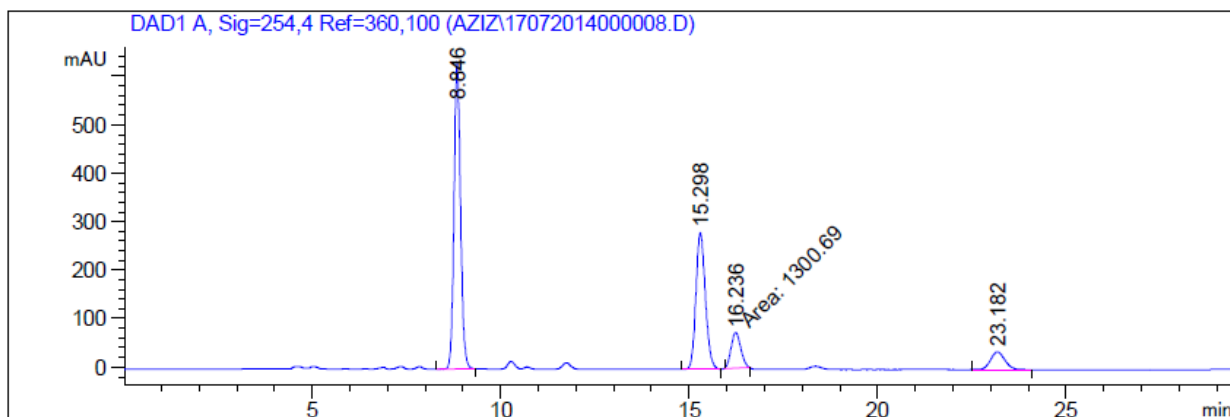

=====  
 Area Percent Report  
 =====

Sorted By : Signal  
 Multiplier : 1.0000  
 Dilution : 1.0000  
 Use Multiplier & Dilution Factor with ISTDs

Signal 1: DAD1 A, Sig=254,4 Ref=360,100

| Peak # | RetTime [min] | Type | Width [min] | Area [mAU*s] | Height [mAU] | Area %  |
|--------|---------------|------|-------------|--------------|--------------|---------|
| 1      | 8.846         | BB   | 0.1864      | 7602.93799   | 631.89838    | 51.3179 |
| 2      | 15.298        | BV   | 0.2703      | 4946.63770   | 282.51614    | 33.3886 |
| 3      | 16.236        | MM   | 0.2955      | 1300.69226   | 73.35119     | 8.7793  |
| 4      | 23.182        | BB   | 0.4060      | 965.09387    | 36.79242     | 6.5141  |

HPLC Chromatogram of Compound **2e** (catalyst **H**)

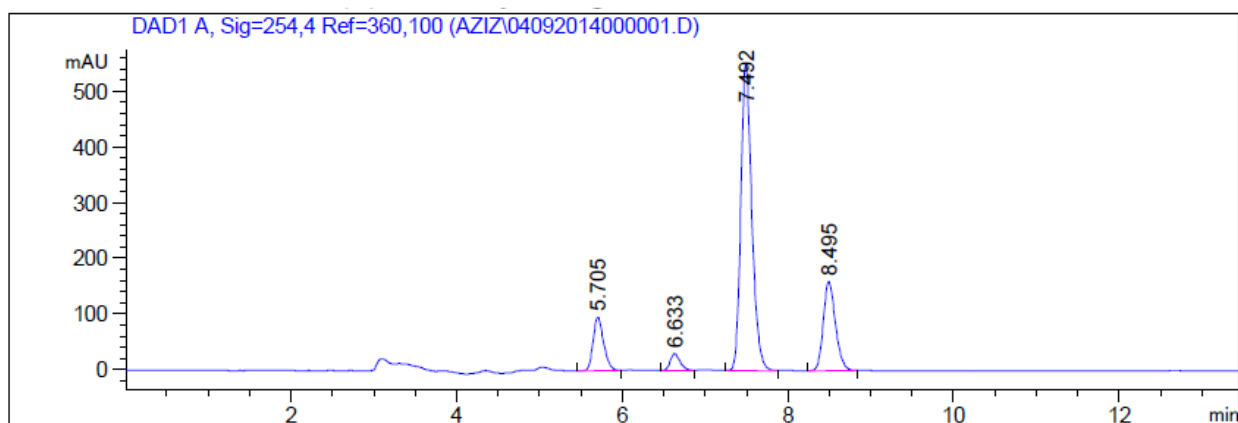

# HPLC Chromatogram of Compound **2f** (catalyst **F**)

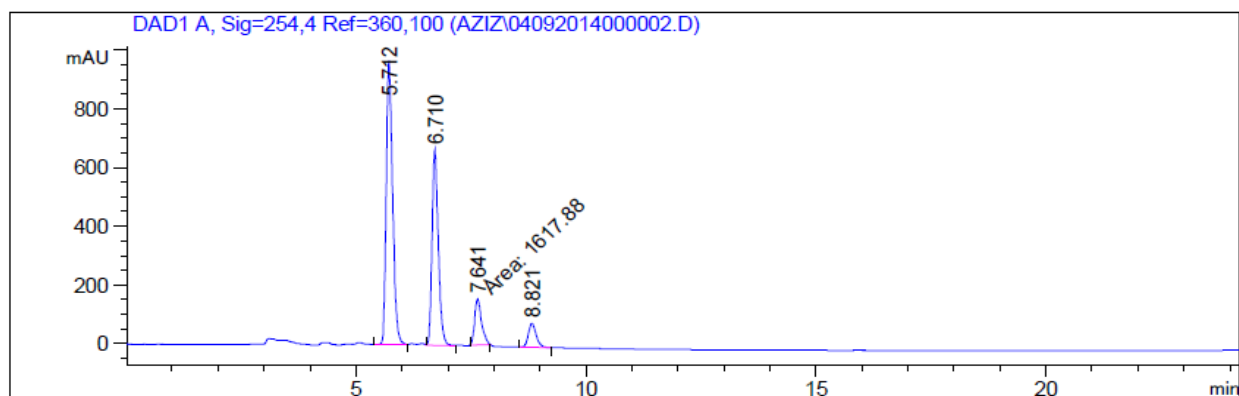

## Area Percent Report

Sorted By : Signal  
Multiplier : 1.0000  
Dilution : 1.0000  
Use Multiplier & Dilution Factor with ISTDs

Signal 1: DAD1 A, Sig=254,4 Ref=360,100

| Peak # | RetTime [min] | Type | Width [min] | Area [mAU*s] | Height [mAU] | Area %  |
|--------|---------------|------|-------------|--------------|--------------|---------|
| 1      | 5.712         | VB   | 0.1468      | 9366.77930   | 968.91626    | 51.2805 |
| 2      | 6.710         | VV   | 0.1442      | 6306.74854   | 667.74414    | 34.5277 |
| 3      | 7.641         | MM   | 0.1731      | 1617.88049   | 155.77136    | 8.8574  |
| 4      | 8.821         | BB   | 0.1797      | 974.35840    | 82.57642     | 5.3343  |

# HPLC Chromatogram of Compound **2f** (catalyst **H**)

Additional Info : Peak(s) manually integrated

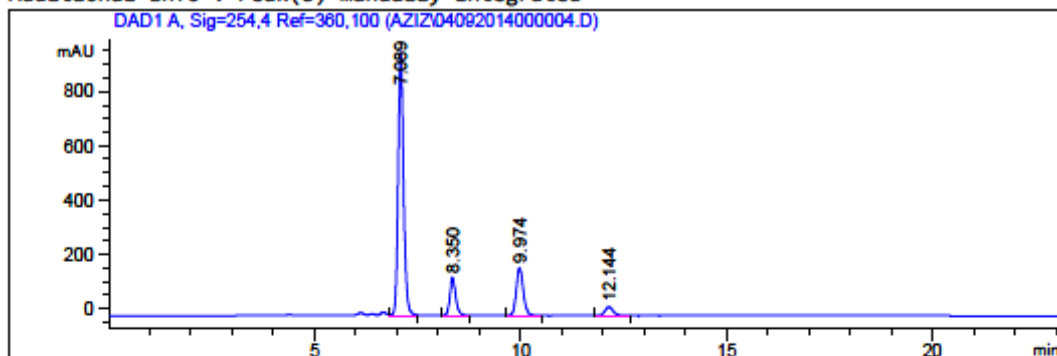

=====  
Area Percent Report  
=====

Sorted By : Signal  
Multiplier : 1.0000  
Dilution : 1.0000  
Use Multiplier & Dilution Factor with ISTDs

Signal 1: DAD1 A, Sig=254,4 Ref=360,100

| Peak # | RetTime [min] | Type | Width [min] | Area [mAU*s] | Height [mAU] | Area %  |
|--------|---------------|------|-------------|--------------|--------------|---------|
| 1      | 7.089         | VB   | 0.1375      | 8706.03711   | 962.40027    | 68.7754 |
| 2      | 8.350         | BV   | 0.1519      | 1422.05957   | 140.69531    | 11.2339 |
| 3      | 9.974         | BB   | 0.1785      | 2078.02295   | 177.58360    | 16.4158 |
| 4      | 12.144        | BB   | 0.2121      | 452.52609    | 32.56121     | 3.5748  |

HPLC Chromatogram of Compound **2g** (catalyst **F**)

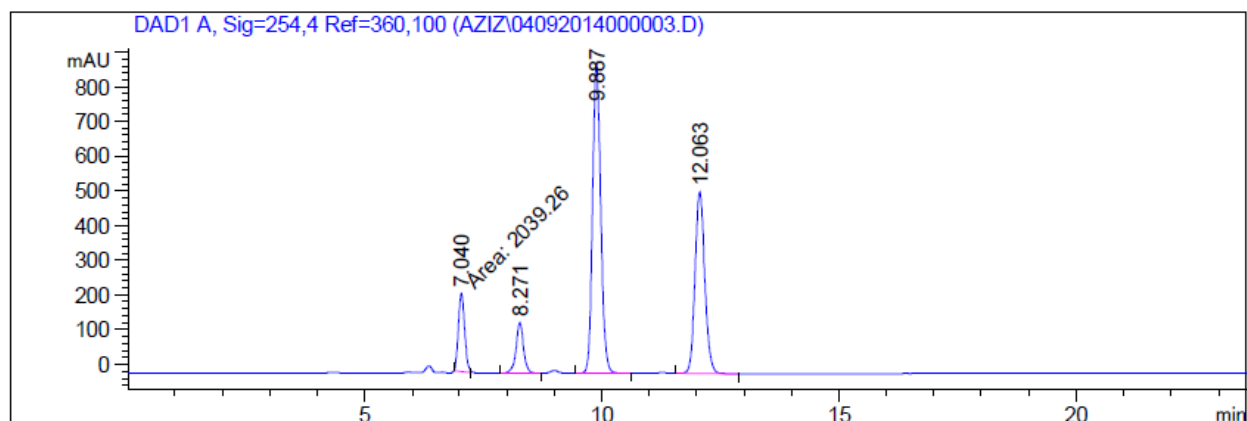

=====  
 Area Percent Report  
 =====

Sorted By : Signal  
 Multiplier : 1.0000  
 Dilution : 1.0000  
 Use Multiplier & Dilution Factor with ISTDs

Signal 1: DAD1 A, Sig=254,4 Ref=360,100

| Peak # | RetTime [min] | Type | Width [min] | Area [mAU*s] | Height [mAU] | Area %  |
|--------|---------------|------|-------------|--------------|--------------|---------|
| 1      | 7.040         | MM   | 0.1501      | 2039.25610   | 226.44124    | 9.3439  |
| 2      | 8.271         | BB   | 0.1679      | 1634.19470   | 146.76547    | 7.4879  |
| 3      | 9.887         | BB   | 0.1836      | 1.06843e4    | 892.76276    | 48.9553 |
| 4      | 12.063        | BB   | 0.2184      | 7466.78711   | 523.46533    | 34.2129 |

HPLC Chromatogram of Compound **2g** (catalyst **H**)

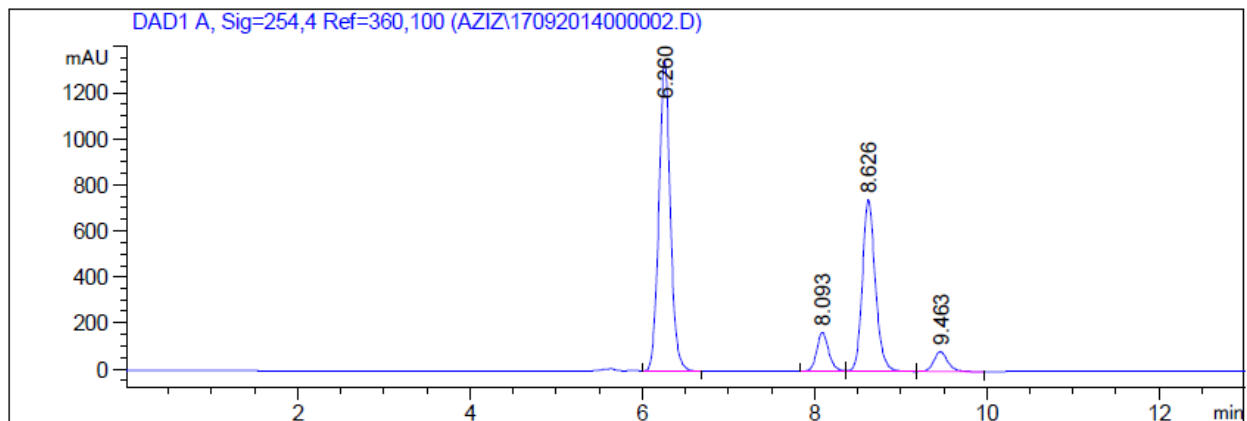

HPLC Chromatogram of Compound **2h** (catalyst **F**)

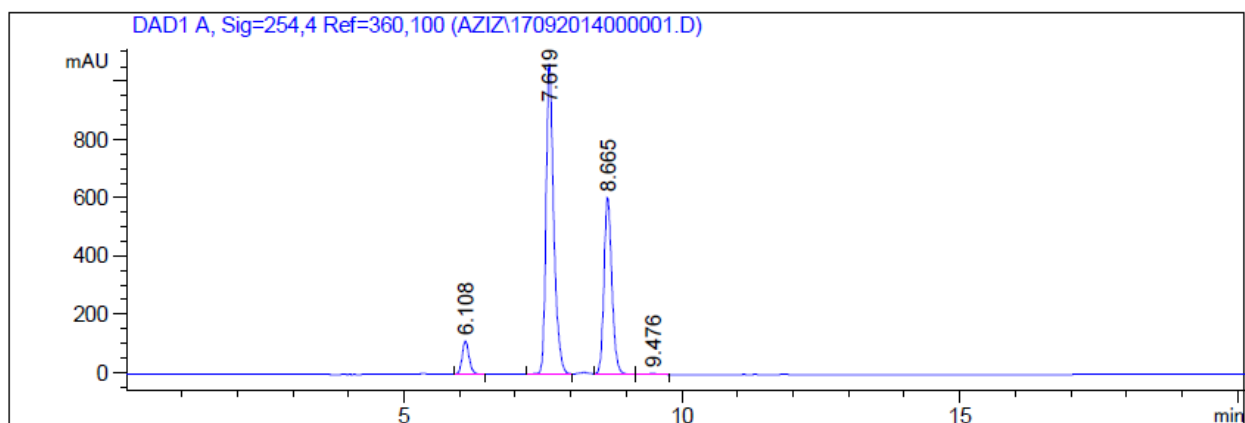

### Area Percent Report

Sorted By : Signal  
Multiplier : 1.0000  
Dilution : 1.0000  
Use Multiplier & Dilution Factor with ISTDs

Signal 1: DAD1 A, Sig=254,4 Ref=360,100

| Peak # | RetTime [min] | Type | Width [min] | Area [mAU*s] | Height [mAU] | Area %  |
|--------|---------------|------|-------------|--------------|--------------|---------|
| 1      | 6.108         | BB   | 0.1309      | 990.18909    | 114.54664    | 5.7304  |
| 2      | 7.619         | BV   | 0.1443      | 1.02623e4    | 1065.87573   | 59.3903 |
| 3      | 8.665         | VB   | 0.1513      | 5996.02197   | 606.57910    | 34.7003 |
| 4      | 9.476         | BB   | 0.1761      | 30.92213     | 2.65132      | 0.1790  |

### HPLC Chromatogram of Compound **2h** (catalyst **H**)

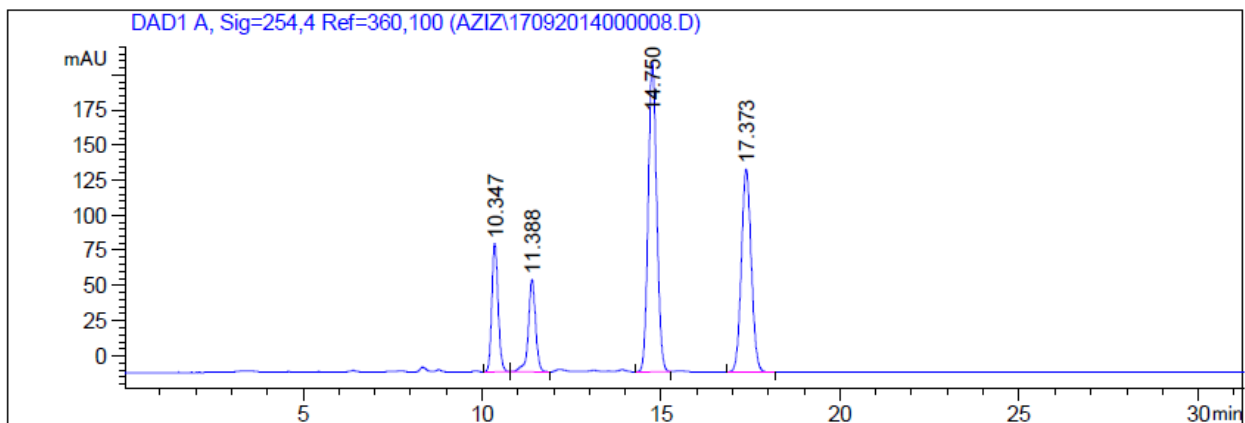

HPLC Chromatogram of Compound **2i** (catalyst **F**)

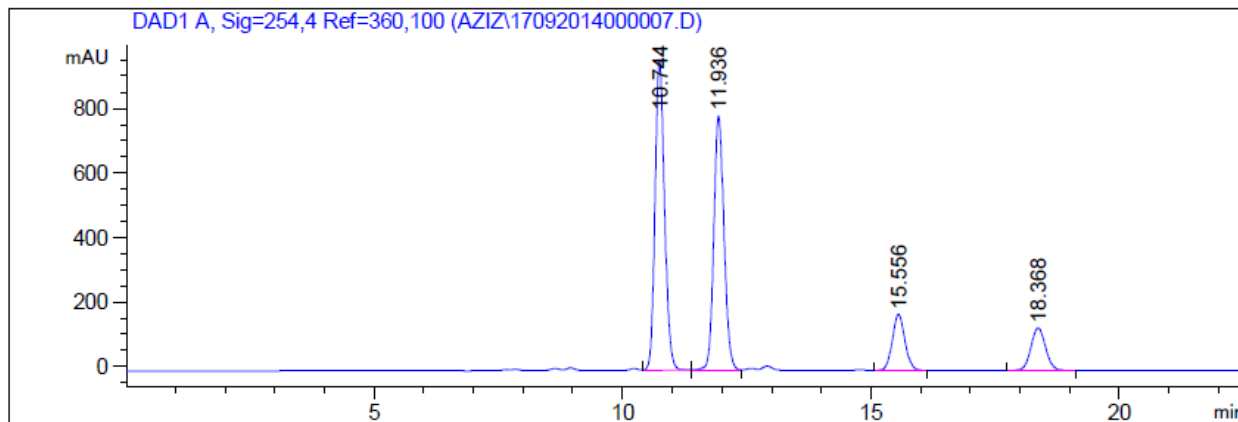

Area Percent Report

Sorted By : Signal  
Multiplier : 1.0000  
Dilution : 1.0000  
Use Multiplier & Dilution Factor with ISTDs

Signal 1: DAD1 A, Sig=254,4 Ref=360,100

| Peak # | RetTime [min] | Type | Width [min] | Area [mAU*s] | Height [mAU] | Area %  |
|--------|---------------|------|-------------|--------------|--------------|---------|
| 1      | 10.744        | VB   | 0.2086      | 1.28922e4    | 960.40515    | 43.1507 |
| 2      | 11.936        | BB   | 0.2205      | 1.12272e4    | 786.91205    | 37.5780 |
| 3      | 15.556        | BB   | 0.2726      | 3071.67090   | 173.46368    | 10.2810 |
| 4      | 18.368        | BB   | 0.3151      | 2686.03979   | 131.06013    | 8.9903  |

HPLC Chromatogram of Compound **2i** (catalyst **H**)



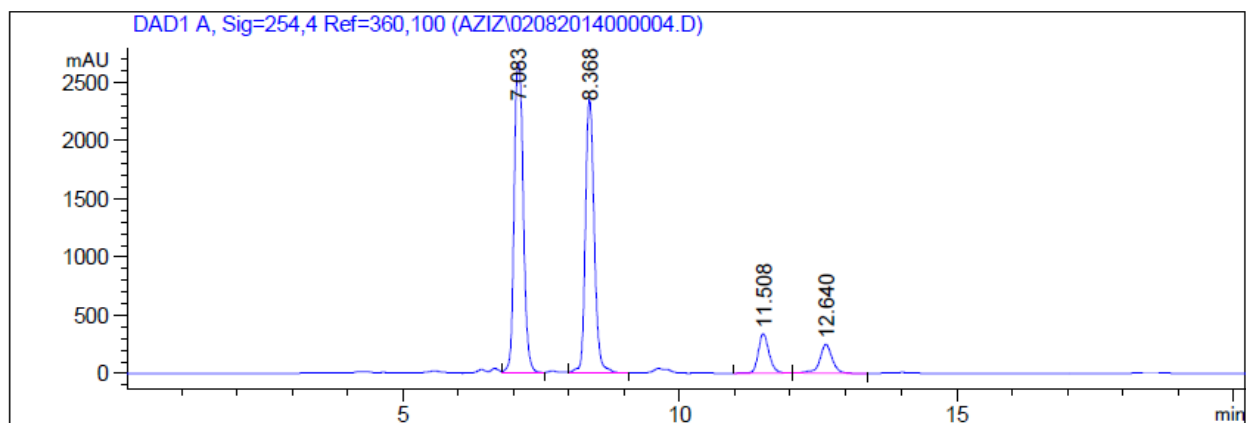

HPLC Chromatogram of Compound **2j** (catalyst **F**)

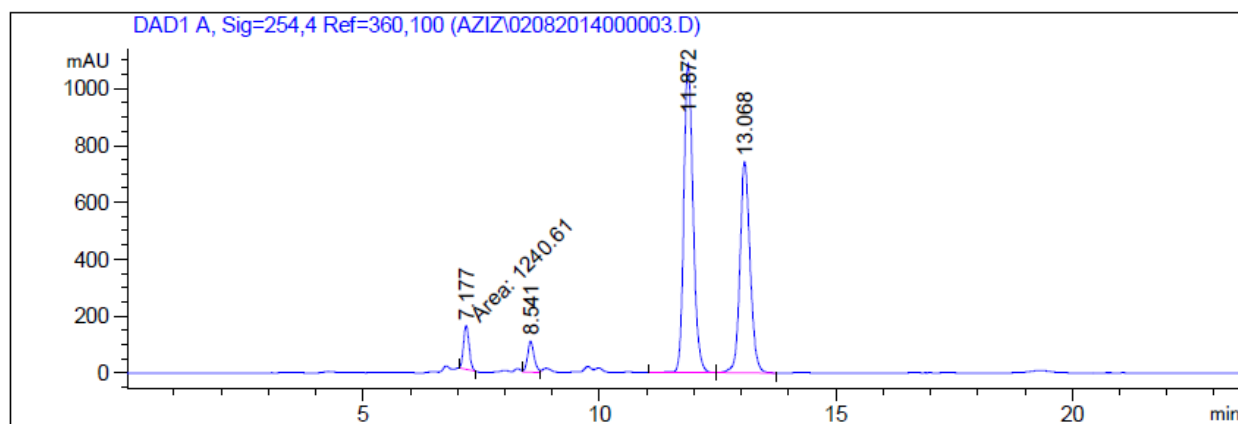

=====  
Area Percent Report  
=====

Sorted By : Signal  
Multiplier : 1.0000  
Dilution : 1.0000  
Use Multiplier & Dilution Factor with ISTDs

Signal 1: DAD1 A, Sig=254,4 Ref=360,100

| Peak # | RetTime [min] | Type | Width [min] | Area [mAU*s] | Height [mAU] | Area %  |
|--------|---------------|------|-------------|--------------|--------------|---------|
| 1      | 7.177         | MM   | 0.1351      | 1240.61340   | 153.01846    | 4.4066  |
| 2      | 8.541         | VV   | 0.1494      | 1048.92249   | 107.89597    | 3.7257  |
| 3      | 11.872        | BB   | 0.2090      | 1.47802e4    | 1084.20447   | 52.4989 |
| 4      | 13.068        | BB   | 0.2282      | 1.10836e4    | 742.25183    | 39.3687 |

HPLC Chromatogram of Compound **2j** (catalyst **H**)

Additional Info : Peak(s) manually integrated

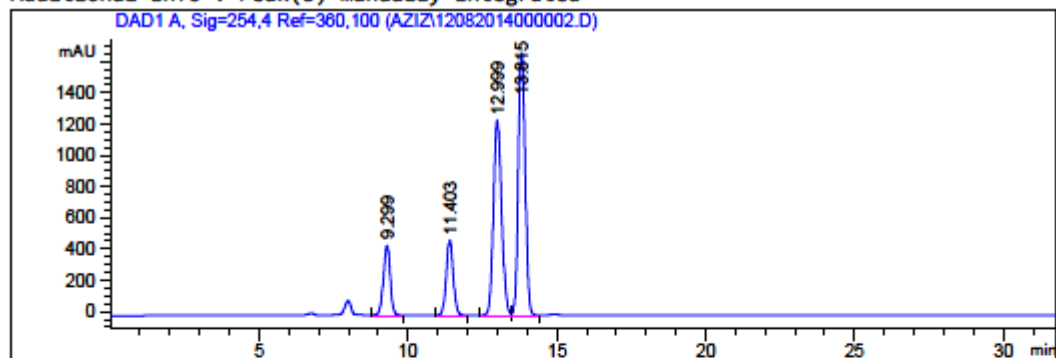

=====  
Area Percent Report  
=====

Sorted By : Signal  
Multiplier : 1.0000  
Dilution : 1.0000  
Use Multiplier & Dilution Factor with ISTDs

Signal 1: DAD1 A, Sig=254,4 Ref=360,100

| Peak # | RetTime [min] | Type | Width [min] | Area [mAU*s] | Height [mAU] | Area %  |
|--------|---------------|------|-------------|--------------|--------------|---------|
| 1      | 9.299         | BB   | 0.2478      | 7143.62842   | 448.66660    | 10.8272 |
| 2      | 11.403        | BB   | 0.2534      | 7899.78711   | 481.40689    | 11.9733 |
| 3      | 12.999        | BV   | 0.2952      | 2.38442e4    | 1246.58984   | 36.1394 |
| 4      | 13.815        | VB   | 0.2565      | 2.70909e4    | 1676.42993   | 41.0602 |

HPLC Chromatogram of Compound **2k** (catalyst **F**)

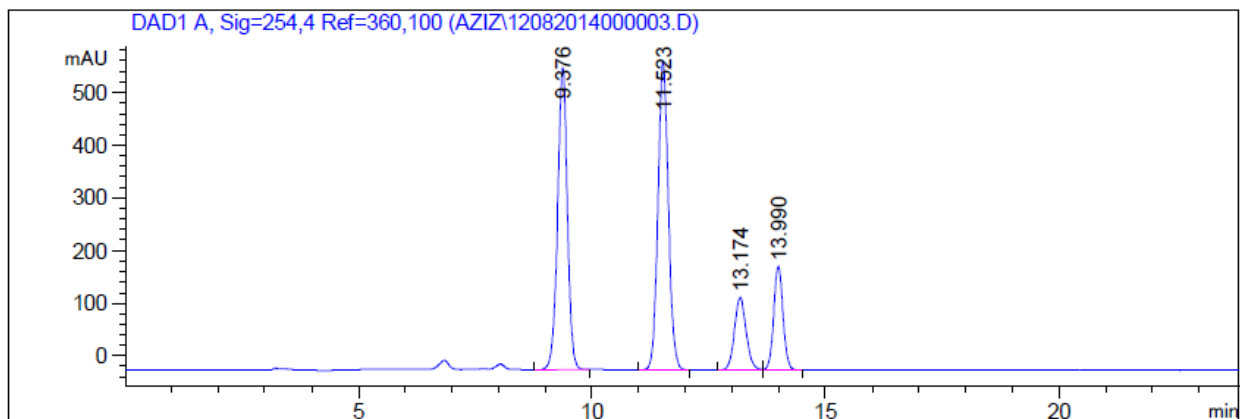

=====  
 Area Percent Report  
 =====

Sorted By : Signal  
 Multiplier : 1.0000  
 Dilution : 1.0000  
 Use Multiplier & Dilution Factor with ISTDs

Signal 1: DAD1 A, Sig=254,4 Ref=360,100

| Peak # | RetTime [min] | Type | Width [min] | Area [mAU*s] | Height [mAU] | Area %  |
|--------|---------------|------|-------------|--------------|--------------|---------|
| 1      | 9.376         | BB   | 0.2219      | 8352.37012   | 573.53320    | 36.9568 |
| 2      | 11.523        | BB   | 0.2392      | 9100.32422   | 585.91217    | 40.2662 |
| 3      | 13.174        | BV   | 0.2702      | 2409.10352   | 137.66310    | 10.6596 |
| 4      | 13.990        | VB   | 0.2142      | 2738.58252   | 196.99352    | 12.1174 |

HPLC Chromatogram of Compound **2k** (catalyst **H**)

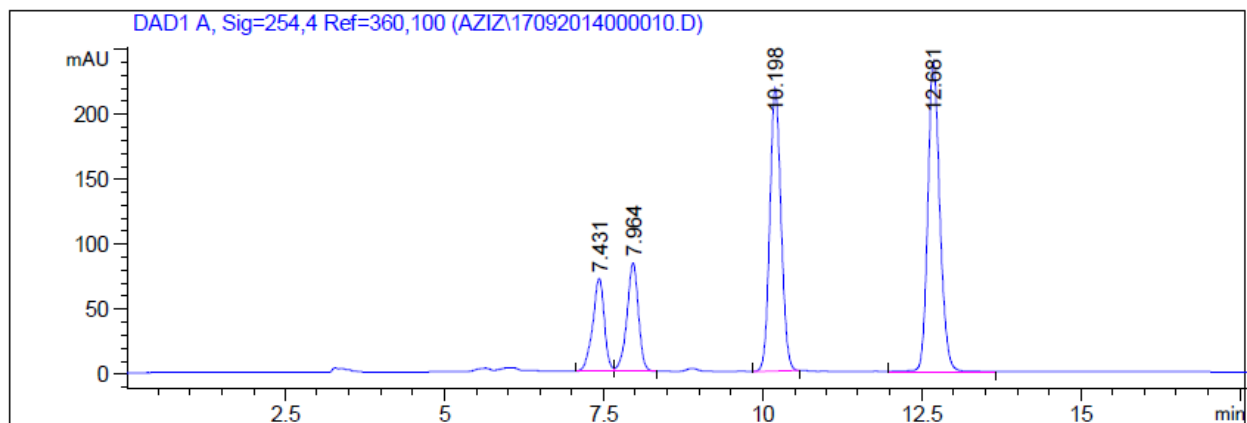

HPLC Chromatogram of Compound **2l** (catalyst **F**)

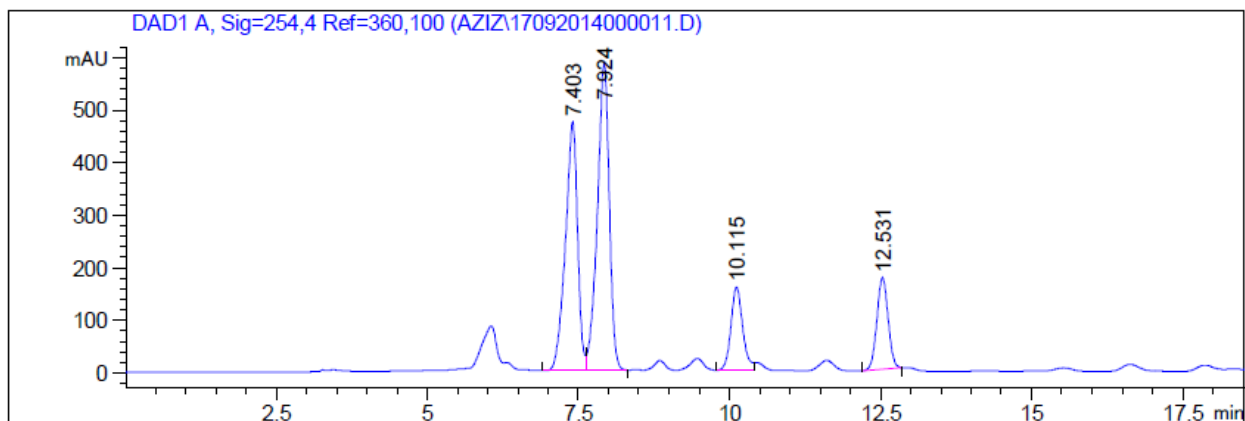

=====  
 Area Percent Report  
 =====

Sorted By : Signal  
 Multiplier : 1.0000  
 Dilution : 1.0000  
 Use Multiplier & Dilution Factor with ISTDs

Signal 1: DAD1 A, Sig=254,4 Ref=360,100

| Peak # | RetTime [min] | Type | Width [min] | Area [mAU*s] | Height [mAU] | Area %  |
|--------|---------------|------|-------------|--------------|--------------|---------|
| 1      | 7.403         | BV   | 0.2054      | 6618.39844   | 472.66504    | 34.7281 |
| 2      | 7.924         | VV   | 0.2044      | 8061.20215   | 586.24323    | 42.2988 |
| 3      | 10.115        | BV   | 0.2057      | 2140.74805   | 158.39182    | 11.2330 |
| 4      | 12.531        | BB   | 0.1996      | 2237.39502   | 174.47870    | 11.7401 |

HPLC Chromatogram of Compound **2l** (catalyst **H**)

Additional Info : Peak(s) manually integrated

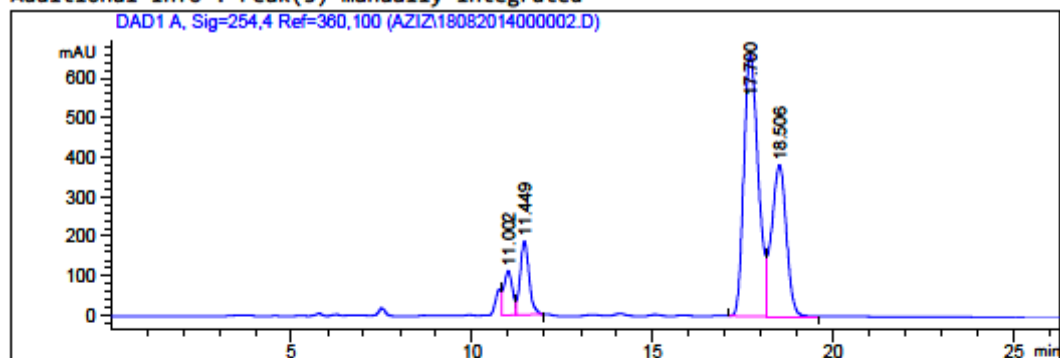

=====  
Area Percent Report  
=====

Sorted By : Signal  
Multiplier : 1.0000  
Dilution : 1.0000  
Use Multiplier & Dilution Factor with ISTDs

Signal 1: DAD1 A, Sig=254,4 Ref=360,100

| Peak # | RetTime [min] | Type | Width [min] | Area [mAU*s] | Height [mAU] | Area %  |
|--------|---------------|------|-------------|--------------|--------------|---------|
| 1      | 11.002        | VV   | 0.2452      | 1834.40442   | 111.91914    | 5.3660  |
| 2      | 11.449        | VB   | 0.2627      | 3203.34888   | 186.21306    | 9.3705  |
| 3      | 17.700        | BV   | 0.4291      | 1.83078e4    | 660.98444    | 53.5543 |
| 4      | 18.506        | VB   | 0.4303      | 1.08399e4    | 382.93246    | 31.7091 |

HPLC Chromatogram of Compound **2m** (catalyst **F**)

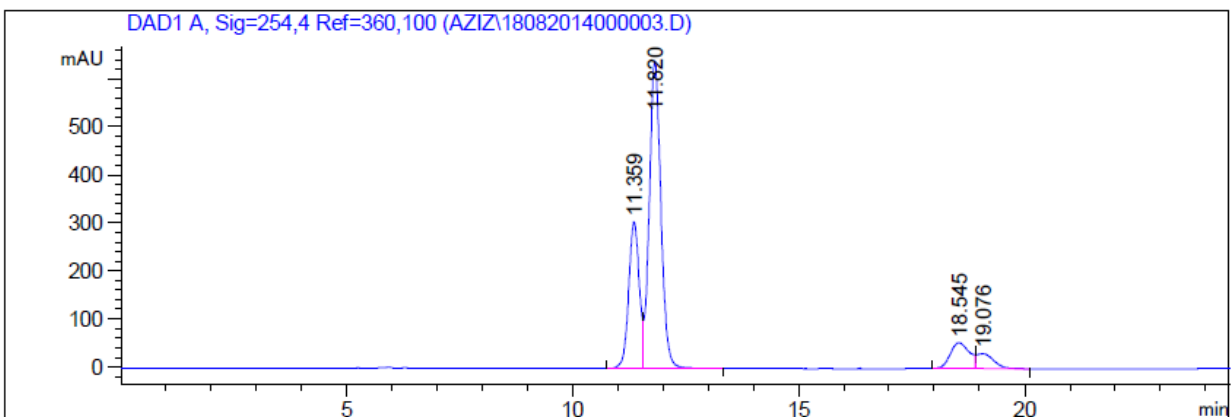

=====  
 Area Percent Report  
 =====

Sorted By : Signal  
 Multiplier : 1.0000  
 Dilution : 1.0000  
 Use Multiplier & Dilution Factor with ISTDs

Signal 1: DAD1 A, Sig=254,4 Ref=360,100

| Peak # | RetTime [min] | Type | Width [min] | Area [mAU*s] | Height [mAU] | Area %  |
|--------|---------------|------|-------------|--------------|--------------|---------|
| 1      | 11.359        | BV   | 0.2499      | 4980.87061   | 306.00101    | 26.4605 |
| 2      | 11.820        | VB   | 0.2747      | 1.14358e4    | 639.37091    | 60.7519 |
| 3      | 18.545        | BV   | 0.4485      | 1596.30933   | 53.75303     | 8.4803  |
| 4      | 19.076        | VB   | 0.3913      | 810.80170    | 30.97958     | 4.3073  |

HPLC Chromatogram of Compound **2m** (catalyst **H**)

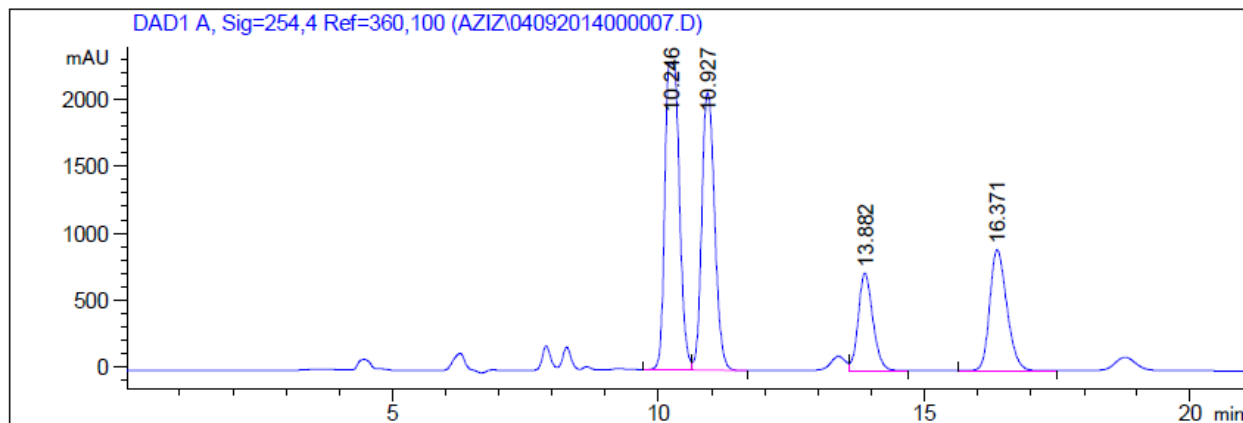

HPLC Chromatogram of Compound **2n** (catalyst **F**)

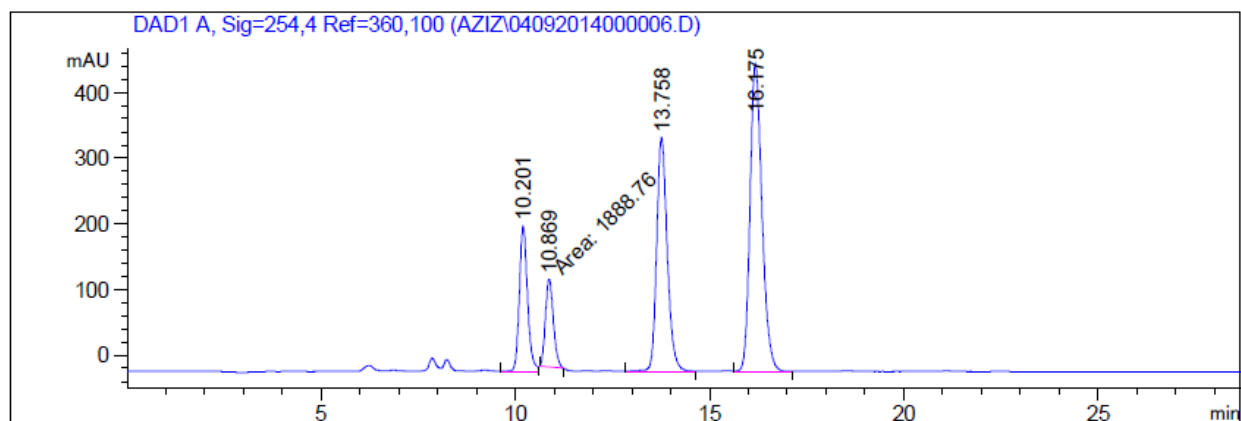

=====  
 Area Percent Report  
 =====

Sorted By : Signal  
 Multiplier : 1.0000  
 Dilution : 1.0000  
 Use Multiplier & Dilution Factor with ISTDs

Signal 1: DAD1 A, Sig=254,4 Ref=360,100

| Peak # | RetTime [min] | Type | Width [min] | Area [mAU*s] | Height [mAU] | Area %  |
|--------|---------------|------|-------------|--------------|--------------|---------|
| 1      | 10.201        | BV   | 0.2242      | 3219.21802   | 220.70094    | 14.7473 |
| 2      | 10.869        | MM   | 0.2365      | 1888.75598   | 133.11102    | 8.6524  |
| 3      | 13.758        | BB   | 0.2909      | 6735.30957   | 355.76675    | 30.8546 |
| 4      | 16.175        | BB   | 0.3287      | 9985.94043   | 468.39224    | 45.7457 |

HPLC Chromatogram of Compound **2n** (catalyst **H**)

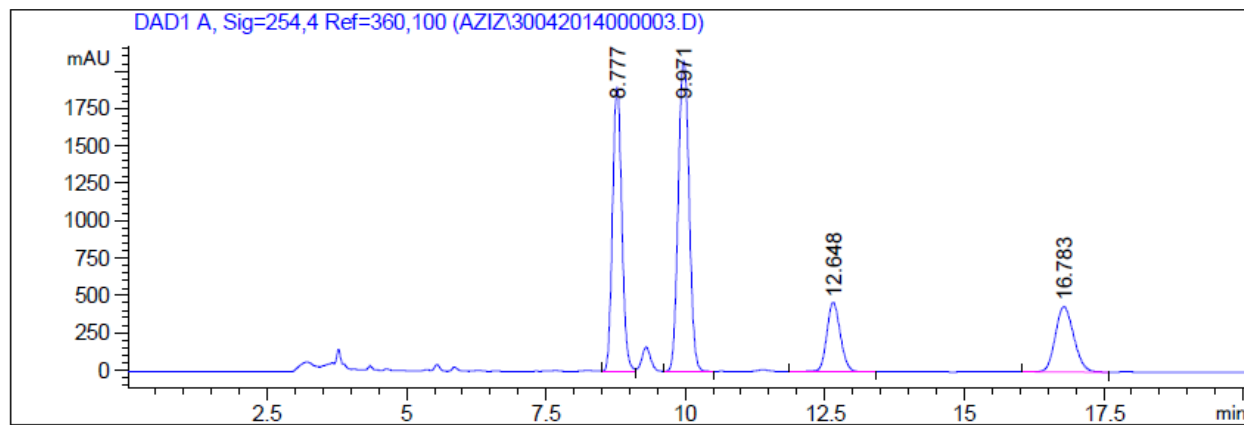

HPLC Chromatogram of Compound **2o** (catalyst **F**)

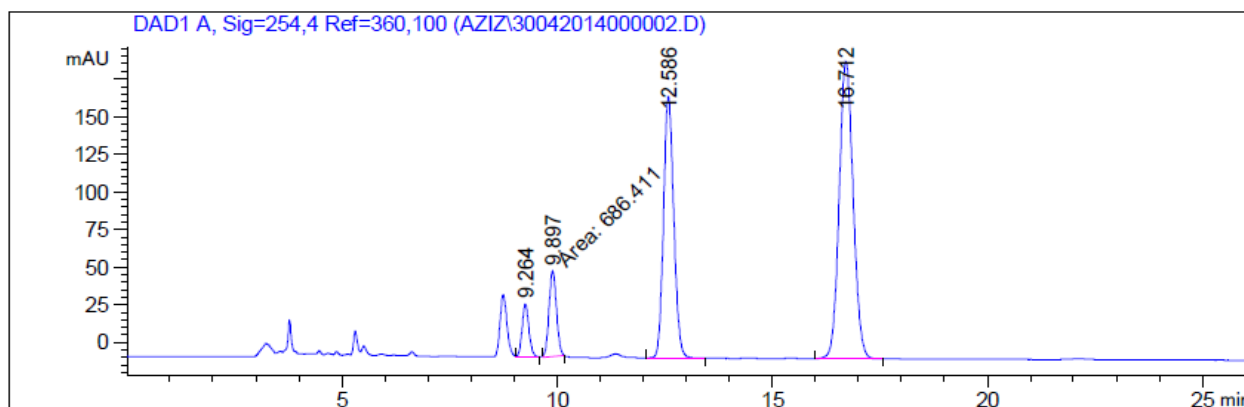

=====  
 Area Percent Report  
 =====

Sorted By : Signal  
 Multiplier : 1.0000  
 Dilution : 1.0000  
 Use Multiplier & Dilution Factor with ISTDs

Signal 1: DAD1 A, Sig=254,4 Ref=360,100

| Peak # | RetTime [min] | Type | Width [min] | Area [mAU*s] | Height [mAU] | Area %  |
|--------|---------------|------|-------------|--------------|--------------|---------|
| 1      | 9.264         | VV   | 0.1726      | 394.29639    | 35.22050     | 4.6862  |
| 2      | 9.897         | MM   | 0.2011      | 686.41125    | 56.90174     | 8.1580  |
| 3      | 12.586        | BB   | 0.2570      | 2870.93481   | 173.50891    | 34.1209 |
| 4      | 16.712        | BB   | 0.3542      | 4462.36670   | 197.05769    | 53.0350 |

HPLC Chromatogram of Compound **2o** (catalyst **H**)

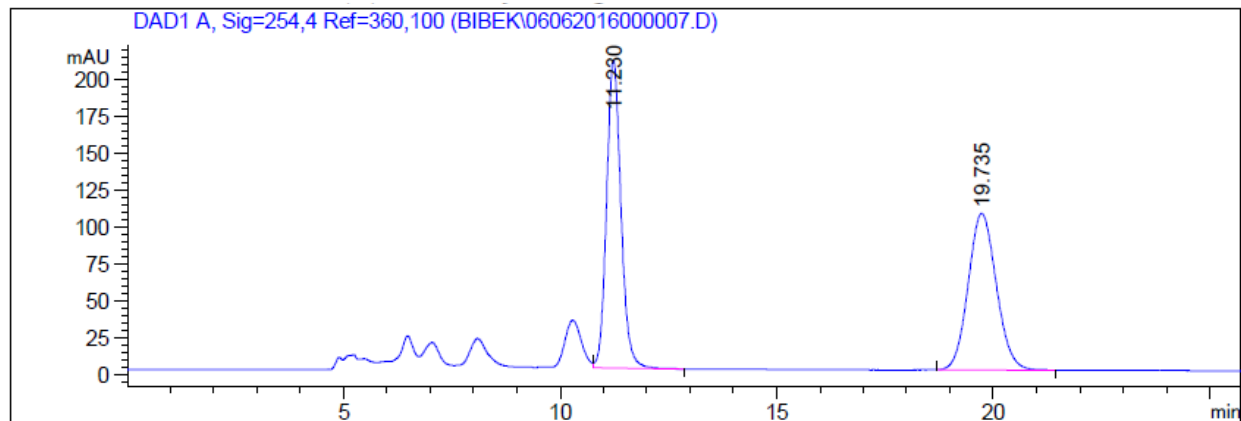

HPLC Chromatogram of Compound (±) **ABT-627**



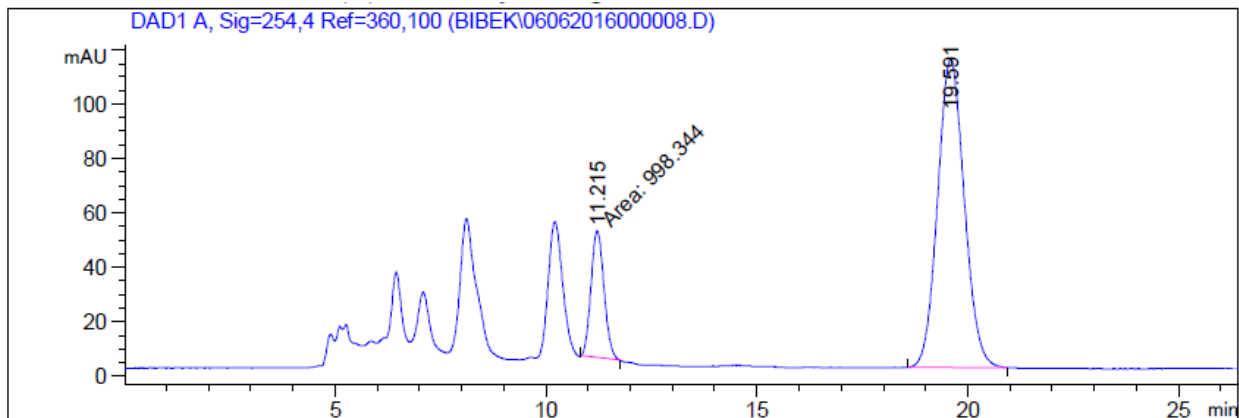

=====  
 Area Percent Report  
 =====

Sorted By : Signal  
 Multiplier : 1.0000  
 Dilution : 1.0000  
 Use Multiplier & Dilution Factor with ISTDs

Signal 1: DAD1 A, Sig=254,4 Ref=360,100

| Peak # | RetTime [min] | Type | Width [min] | Area [mAU*s] | Height [mAU] | Area %  |
|--------|---------------|------|-------------|--------------|--------------|---------|
| 1      | 11.215        | MM   | 0.3573      | 998.34399    | 46.56297     | 16.6861 |
| 2      | 19.591        | BB   | 0.6724      | 4984.74121   | 113.06143    | 83.3139 |

HPLC Chromatogram of Compound **ABT-627**
